# Supplementary material
Source: MDPI journal article supplement (https://www.mdpi.com/2072-4292/10/12/2042)
Supplement: s1 [file s1]

## CORONA photogrammetry triangulation reports

### Sahlan-Hammam canal

The Triangulation Report With LPS

The output image x, y units: pixels

The output angle unit: degrees

The output ground X, Y, Z units: meters

The Input Image Coordinates

image ID = 1

| Point ID | x       | y       |    |         |         |
|----------|---------|---------|----|---------|---------|
| 1        | 414.054 | 211.230 | 20 | 94.206  | 99.409  |
| 3        | 224.243 | 170.064 | 21 | 99.845  | 248.360 |
| 4        | 367.052 | 452.858 | 22 | 79.945  | 341.607 |
| 5        | 26.043  | 435.888 | 23 | 77.901  | 401.903 |
| 6        | 343.347 | 27.085  | 24 | 238.461 | 396.047 |
| 7        | 311.067 | 417.943 | 25 | 173.934 | 413.197 |
| 8        | 265.362 | 353.034 | 26 | 188.815 | 315.025 |
| 9        | 165.282 | 37.852  | 27 | 251.662 | 209.205 |
| 10       | 315.569 | 182.338 | 28 | 187.522 | 75.337  |
| 11       | 392.999 | 127.403 | 29 | 221.088 | 67.975  |
| 12       | 258.089 | 72.081  | 30 | 211.864 | 132.711 |
| 13       | 277.984 | 252.971 | 31 | 314.215 | 106.277 |
| 14       | 323.438 | 323.965 | 32 | 359.033 | 277.592 |
| 15       | 369.918 | 394.774 | 33 | 396.000 | 122.765 |
| 16       | 366.030 | 224.843 | 34 | 337.631 | 149.226 |
| 17       | 368.665 | 63.261  | 35 | 349.623 | 159.979 |
| 18       | 293.466 | 12.171  | 36 | 318.930 | 182.994 |
| 19       | 57.341  | 148.968 | 37 | 394.805 | 232.646 |

Affine coefficients from file (pixels) to film (millimeters)

|         |           |          |         |          |          |  |
|---------|-----------|----------|---------|----------|----------|--|
| A0      | A1        | A2       | B0      | B1       | B2       |  |
| -1.5890 | -0.000000 | 0.007000 | -1.4840 | 0.007000 | 0.000000 |  |

image ID = 2

| Point ID | x       | y       |    |         |         |
|----------|---------|---------|----|---------|---------|
| 1        | 426.881 | 282.205 | 20 | 100.136 | 106.975 |
| 3        | 236.148 | 208.000 | 21 | 120.199 | 264.108 |
| 4        | 409.827 | 525.925 | 22 | 114.174 | 356.960 |
| 5        | 74.801  | 449.891 | 23 | 120.809 | 420.419 |
| 6        | 336.245 | 77.210  | 24 | 279.304 | 445.209 |
| 7        | 352.183 | 479.155 | 25 | 217.915 | 449.686 |
| 8        | 299.985 | 405.277 | 26 | 219.453 | 349.365 |
| 9        | 161.263 | 56.164  | 27 | 265.139 | 253.879 |
| 10       | 327.599 | 234.313 | 28 | 188.093 | 99.588  |
| 11       | 396.150 | 191.394 | 29 | 218.997 | 97.112  |
| 12       | 254.016 | 107.975 | 30 | 221.720 | 169.793 |
| 13       | 297.630 | 299.283 | 31 | 312.994 | 158.037 |
| 14       | 351.559 | 382.716 | 32 | 380.940 | 341.890 |
| 15       | 406.440 | 467.118 | 33 | 398.736 | 186.919 |
| 16       | 382.282 | 286.995 | 34 | 344.898 | 204.068 |
| 17       | 364.245 | 120.295 | 35 | 373.308 | 227.289 |
| 18       | 283.804 | 53.941  | 36 | 330.736 | 235.060 |
| 19       | 69.267  | 153.068 | 37 | 409.997 | 302.076 |

Affine coefficients from file (pixels) to film (millimeters)

|         |          |          |         |          |          |  |
|---------|----------|----------|---------|----------|----------|--|
| A0      | A1       | A2       | B0      | B1       | B2       |  |
| -1.8515 | 0.000000 | 0.007000 | -1.6590 | 0.007000 | 0.000000 |  |

# THE OUTPUT OF SELF-CALIBRATING BUNDLE BLOCK ADJUSTMENT

the no. of iteration =1    the standard error = 1.8861  
the maximal correction of the object points = 0.00000

the no. of iteration =2    the standard error = 1.8861  
the maximal correction of the object points = 0.00000

The exterior orientation parameters

| image ID | Xs          | Ys           | Zs           | OMEGA     | PHI       | KAPPA     |
|----------|-------------|--------------|--------------|-----------|-----------|-----------|
| 1        | 397452.1731 | 4071491.4483 | 150784.0732  | -372.5057 | -394.6698 | -442.1647 |
| 2        | 599534.3642 | 4089909.0019 | -153841.3970 | 198.5702  | -509.5860 | -72.3136  |

The interior orientation parameters of photos

| image ID | f(mm)    | xo(mm) | yo(mm) |
|----------|----------|--------|--------|
| 1        | 609.6020 | 0.0000 | 0.0000 |
| 2        | 609.6020 | 0.0000 | 0.0000 |

The residuals of the control points

| Point ID                             | rX | rY | rZ |
|--------------------------------------|----|----|----|
| All residuals of fixed GCP are zero. |    |    |    |

## The difference of intersected and measured control points

| Point ID | rX       | rY      | rZ      |    |         |         |          |
|----------|----------|---------|---------|----|---------|---------|----------|
| 1        | -3.1533  | -5.4838 | 0.7860  | 20 | -8.9578 | -0.2793 | 10.4156  |
| 3        | 3.2235   | 4.9718  | -9.6947 | 21 | 1.1453  | 0.2344  | 1.4776   |
| 4        | -0.1518  | 0.1848  | 5.0720  | 22 | -6.2930 | -1.5689 | 4.5538   |
| 5        | 12.9581  | -2.0258 | -9.0979 | 23 | -1.1280 | -4.7917 | 0.3282   |
| 6        | -0.7512  | -2.0166 | -0.0819 | 24 | 1.6509  | 2.7550  | -4.6475  |
| 7        | -1.9849  | 0.3937  | 2.9420  | 25 | -0.0886 | -2.3291 | -0.2875  |
| 8        | 1.4933   | 5.0958  | -4.6816 | 26 | 0.6935  | 2.8766  | 5.3408   |
| 9        | -2.0992  | -0.2702 | 3.0583  | 27 | 6.8975  | -1.3628 | -11.3525 |
| 10       | -4.9653  | -3.3135 | 4.0855  | 28 | -3.7461 | 2.7869  | 3.1177   |
| 11       | -1.3827  | -3.9330 | 2.0009  | 29 | -0.4827 | 1.4436  | 6.8583   |
| 12       | -3.6289  | -0.1197 | 3.0769  | 30 | 12.2168 | 1.8916  | -19.6087 |
| 13       | -10.1188 | -0.1759 | 7.4889  | 31 | 9.8716  | 1.5551  | -12.3730 |
| 14       | -3.1035  | 2.0583  | 5.8925  | 32 | -2.4705 | 0.4247  | -2.2383  |
| 15       | -4.7739  | -0.1847 | -1.9817 | 33 | -1.4948 | -0.4971 | 1.1080   |
| 16       | -0.8648  | -0.6031 | 5.2139  | 34 | -1.2230 | -0.2027 | 1.7742   |
| 17       | 3.9999   | -2.9323 | -1.5682 | 35 | 16.1600 | 7.2757  | 2.4685   |
| 18       | -0.9565  | -0.8072 | -4.5649 | 36 | -3.2768 | -0.3132 | 5.2297   |
| 19       | -3.5392  | -0.2034 | 4.1278  | 37 | 0.2830  | -0.5348 | -4.1754  |

|         |         |        |
|---------|---------|--------|
| aX      | aY      | aZ     |
| -0.0012 | -0.0000 | 0.0018 |
| mX      | mY      | mZ     |
| 5.5780  | 2.6244  | 6.2376 |
| CE90    | LE90    |        |
| 8.9260  | 10.3969 |        |

## The image residuals of intersected GCP

| Point | Image | Vx     | Vy     |       |       |        |        |
|-------|-------|--------|--------|-------|-------|--------|--------|
| 1     | 1     | -0.729 | -0.087 | 3     | 1     | 0.223  | 0.029  |
| 1     | 2     | 0.737  | -0.005 | 3     | 2     | -0.226 | -0.001 |
| Point | Image | Vx     | Vy     | Point | Image | Vx     | Vy     |

|   |   |        |        |
|---|---|--------|--------|
| 4 | 1 | -1.049 | -0.126 |
| 4 | 2 | 1.060  | -0.006 |

| Point | Image | Vx     | Vy     |
|-------|-------|--------|--------|
| 5     | 1     | 0.529  | 0.072  |
| 5     | 2     | -0.539 | -0.006 |

| Point | Image | Vx     | Vy    |
|-------|-------|--------|-------|
| 6     | 1     | 0.395  | 0.049 |
| 6     | 2     | -0.400 | 0.001 |

| Point | Image | Vx     | Vy    |
|-------|-------|--------|-------|
| 7     | 1     | 0.000  | 0.000 |
| 7     | 2     | -0.000 | 0.000 |

| Point | Image | Vx     | Vy    |
|-------|-------|--------|-------|
| 8     | 1     | 0.509  | 0.064 |
| 8     | 2     | -0.516 | 0.000 |

| Point | Image | Vx     | Vy     |
|-------|-------|--------|--------|
| 9     | 1     | -0.039 | -0.005 |
| 9     | 2     | 0.039  | 0.000  |

| Point | Image | Vx     | Vy    |
|-------|-------|--------|-------|
| 10    | 1     | 0.140  | 0.017 |
| 10    | 2     | -0.142 | 0.000 |

| Point | Image | Vx     | Vy     |
|-------|-------|--------|--------|
| 11    | 1     | -0.443 | -0.054 |
| 11    | 2     | 0.448  | -0.002 |

| Point | Image | Vx     | Vy     |
|-------|-------|--------|--------|
| 12    | 1     | -1.436 | -0.184 |
| 12    | 2     | 1.456  | 0.003  |

| Point | Image | Vx     | Vy     |
|-------|-------|--------|--------|
| 13    | 1     | -0.672 | -0.084 |
| 13    | 2     | 0.681  | -0.000 |

| Point | Image | Vx     | Vy     |
|-------|-------|--------|--------|
| 14    | 1     | -0.573 | -0.070 |
| 14    | 2     | 0.579  | -0.002 |

| Point | Image | Vx     | Vy     |
|-------|-------|--------|--------|
| 15    | 1     | -0.545 | -0.066 |
| 15    | 2     | 0.551  | -0.003 |

| Point | Image | Vx     | Vy     |
|-------|-------|--------|--------|
| 16    | 1     | -0.104 | -0.013 |
| 16    | 2     | 0.106  | -0.000 |

| Point | Image | Vx     | Vy     |
|-------|-------|--------|--------|
| 17    | 1     | -0.363 | -0.044 |
| 17    | 2     | 0.367  | -0.001 |

| Point | Image | Vx     | Vy     |
|-------|-------|--------|--------|
| 18    | 1     | -0.274 | -0.035 |
| 18    | 2     | 0.277  | 0.000  |

| Point | Image | Vx | Vy |
|-------|-------|----|----|
|-------|-------|----|----|

|    |   |        |        |
|----|---|--------|--------|
| 19 | 1 | 0.076  | 0.010  |
| 19 | 2 | -0.077 | -0.001 |

| Point | Image | Vx     | Vy     |
|-------|-------|--------|--------|
| 20    | 1     | 0.481  | 0.065  |
| 20    | 2     | -0.490 | -0.005 |

| Point | Image | Vx     | Vy     |
|-------|-------|--------|--------|
| 21    | 1     | -1.417 | -0.191 |
| 21    | 2     | 1.441  | 0.012  |

| Point | Image | Vx     | Vy     |
|-------|-------|--------|--------|
| 22    | 1     | -0.427 | -0.058 |
| 22    | 2     | 0.434  | 0.004  |

| Point | Image | Vx     | Vy     |
|-------|-------|--------|--------|
| 23    | 1     | 0.173  | 0.023  |
| 23    | 2     | -0.176 | -0.001 |

| Point | Image | Vx     | Vy     |
|-------|-------|--------|--------|
| 24    | 1     | 0.769  | 0.097  |
| 24    | 2     | -0.780 | -0.001 |

| Point | Image | Vx     | Vy     |
|-------|-------|--------|--------|
| 25    | 1     | 0.809  | 0.105  |
| 25    | 2     | -0.821 | -0.003 |

| Point | Image | Vx     | Vy     |
|-------|-------|--------|--------|
| 26    | 1     | 0.335  | 0.043  |
| 26    | 2     | -0.340 | -0.001 |

| Point | Image | Vx     | Vy     |
|-------|-------|--------|--------|
| 27    | 1     | -1.210 | -0.154 |
| 27    | 2     | 1.227  | 0.002  |

| Point | Image | Vx     | Vy     |
|-------|-------|--------|--------|
| 28    | 1     | 0.127  | 0.017  |
| 28    | 2     | -0.129 | -0.001 |

| Point | Image | Vx     | Vy     |
|-------|-------|--------|--------|
| 29    | 1     | -0.476 | -0.062 |
| 29    | 2     | 0.483  | 0.002  |

| Point | Image | Vx     | Vy     |
|-------|-------|--------|--------|
| 30    | 1     | 1.414  | 0.183  |
| 30    | 2     | -1.436 | -0.005 |

| Point | Image | Vx     | Vy     |
|-------|-------|--------|--------|
| 31    | 1     | -1.753 | -0.219 |
| 31    | 2     | 1.776  | -0.002 |

| Point | Image | Vx     | Vy     |
|-------|-------|--------|--------|
| 32    | 1     | -0.599 | -0.073 |
| 32    | 2     | 0.606  | -0.003 |

| Point | Image | Vx     | Vy     |
|-------|-------|--------|--------|
| 33    | 1     | -0.346 | -0.042 |
| 33    | 2     | 0.350  | -0.002 |

| Point | Image | Vx | Vy |
|-------|-------|----|----|
|-------|-------|----|----|

|    |   |        |        |
|----|---|--------|--------|
| 34 | 1 | -0.049 | -0.006 |
| 34 | 2 | 0.050  | -0.000 |

| Point | Image | Vx     | Vy    |
|-------|-------|--------|-------|
| 35    | 1     | 7.487  | 0.916 |
| 35    | 2     | -7.574 | 0.026 |

| Point | Image | Vx     | Vy    |
|-------|-------|--------|-------|
| 36    | 1     | 0.009  | 0.001 |
| 36    | 2     | -0.009 | 0.000 |

| Point | Image | Vx     | Vy     |
|-------|-------|--------|--------|
| 37    | 1     | -0.974 | -0.117 |
| 37    | 2     | 0.985  | -0.006 |

Mean error of 72 image points: ax=0.000, ay=-0.000

RMSE of 72 image points: mx=1.443, my=0.125

The coordinates of object points

| Point ID | X           | Y            | Z        | Overlap |  |
|----------|-------------|--------------|----------|---------|--|
| 1        | 504559.9080 | 4038218.1330 | 314.0000 | 2       |  |
| 3        | 504049.0130 | 4038238.7580 | 317.0000 | 2       |  |
| 4        | 504600.3520 | 4037670.1510 | 312.0000 | 2       |  |
| 5        | 503716.7480 | 4037606.1200 | 317.0000 | 2       |  |
| 6        | 504252.2610 | 4038595.9630 | 317.0000 | 2       |  |
| 7        | 504436.5930 | 4037730.1590 | 316.0000 | 2       |  |
| 8        | 504278.7000 | 4037852.1190 | 316.0000 | 2       |  |
| 9        | 503802.9130 | 4038517.7900 | 319.0000 | 2       |  |
| 10       | 504291.1900 | 4038249.9370 | 313.0000 | 2       |  |
| 11       | 504448.8600 | 4038393.0380 | 311.0000 | 2       |  |
| 12       | 504061.6560 | 4038470.6640 | 317.0000 | 2       |  |
| 13       | 504241.4880 | 4038082.7990 | 317.0000 | 2       |  |
| 14       | 504402.6250 | 4037937.9850 | 314.0000 | 2       |  |
| 15       | 504577.3050 | 4037797.4380 | 314.0000 | 2       |  |
| 16       | 504442.8250 | 4038170.0240 | 314.0000 | 2       |  |
| 17       | 504338.0290 | 4038524.6110 | 314.0000 | 2       |  |
| 18       | 504116.5900 | 4038611.1200 | 317.0000 | 2       |  |
| 19       | 503606.0370 | 4038242.9530 | 318.0000 | 2       |  |
| 20       | 503669.3910 | 4038363.1050 | 316.0000 | 2       |  |
| 21       | 503775.0430 | 4038037.9060 | 318.0000 | 2       |  |
| 22       | 503795.2070 | 4037831.1270 | 319.0000 | 2       |  |
| 23       | 503829.8520 | 4037701.3260 | 320.0000 | 2       |  |
| 24       | 504239.3440 | 4037752.5990 | 317.0000 | 2       |  |
| 25       | 504083.1940 | 4037702.6120 | 320.0000 | 2       |  |
| 26       | 504050.7710 | 4037916.7650 | 316.0000 | 2       |  |
| 27       | 504140.0690 | 4038167.2670 | 316.0000 | 2       |  |
| 28       | 503888.4960 | 4038439.3330 | 317.0000 | 2       |  |
| 29       | 503962.7850 | 4038467.2630 | 315.0000 | 2       |  |
| 30       | 503993.1300 | 4038317.4600 | 317.0000 | 2       |  |
| 31       | 504226.7930 | 4038407.2940 | 314.0000 | 2       |  |
| 32       | 504464.6260 | 4038050.5620 | 317.0000 | 2       |  |
| 33       | 504453.1950 | 4038400.8030 | 312.6082 | 2       |  |
| 34       | 504321.9614 | 4038325.3614 | 313.2941 | 2       |  |
| 35       | 504383.5747 | 4038291.7099 | 282.8007 | 2       |  |
| 36       | 504296.8190 | 4038246.9363 | 313.7674 | 2       |  |
| 37       | 504524.0074 | 4038159.7274 | 315.2476 | 2       |  |

The total object points = 36

The residuals of image points

| Point | Image | Vx    | Vy     |
|-------|-------|-------|--------|
| 1     | 1     | 0.921 | -2.447 |
| 1     | 2     | 2.078 | -1.980 |

| Point | Image | Vx    | Vy    |
|-------|-------|-------|-------|
| 3     | 1     | 0.759 | 3.362 |

|   |   |       |       |
|---|---|-------|-------|
| 3 | 2 | 0.723 | 1.093 |
|---|---|-------|-------|

| Point | Image | Vx     | Vy     |
|-------|-------|--------|--------|
| 4     | 1     | -2.241 | -0.724 |
| 4     | 2     | -0.189 | 0.469  |

|       |       |        |        |
|-------|-------|--------|--------|
| Point | Image | Vx     | Vy     |
| 5     | 1     | -1.952 | -0.254 |
| 5     | 2     | -2.986 | -3.135 |

|       |       |       |        |
|-------|-------|-------|--------|
| Point | Image | Vx    | Vy     |
| 6     | 1     | 0.939 | -0.791 |
| 6     | 2     | 0.032 | -0.803 |

|       |       |        |        |
|-------|-------|--------|--------|
| Point | Image | Vx     | Vy     |
| 7     | 1     | -0.009 | -0.123 |
| 7     | 2     | -0.022 | 0.631  |

|       |       |        |       |
|-------|-------|--------|-------|
| Point | Image | Vx     | Vy    |
| 8     | 1     | 0.474  | 2.868 |
| 8     | 2     | -0.203 | 1.715 |

|       |       |       |        |
|-------|-------|-------|--------|
| Point | Image | Vx    | Vy     |
| 9     | 1     | 0.049 | -0.424 |
| 9     | 2     | 0.069 | 0.354  |

|       |       |       |        |
|-------|-------|-------|--------|
| Point | Image | Vx    | Vy     |
| 10    | 1     | 1.420 | -1.736 |
| 10    | 2     | 0.907 | -0.560 |

|       |       |       |        |
|-------|-------|-------|--------|
| Point | Image | Vx    | Vy     |
| 11    | 1     | 0.061 | -1.986 |
| 11    | 2     | 0.708 | -1.422 |

|       |       |        |        |
|-------|-------|--------|--------|
| Point | Image | Vx     | Vy     |
| 12    | 1     | -0.793 | -0.459 |
| 12    | 2     | 2.054  | 0.610  |

|       |       |       |        |
|-------|-------|-------|--------|
| Point | Image | Vx    | Vy     |
| 13    | 1     | 1.363 | -0.646 |
| 13    | 2     | 2.620 | 1.695  |

|       |       |        |       |
|-------|-------|--------|-------|
| Point | Image | Vx     | Vy    |
| 14    | 1     | -1.071 | 0.202 |
| 14    | 2     | 0.125  | 1.713 |

|       |       |       |       |
|-------|-------|-------|-------|
| Point | Image | Vx    | Vy    |
| 15    | 1     | 1.758 | 0.367 |
| 15    | 2     | 2.884 | 0.350 |

|       |       |        |        |
|-------|-------|--------|--------|
| Point | Image | Vx     | Vy     |
| 16    | 1     | -0.970 | -0.936 |
| 16    | 2     | -0.860 | 0.219  |

|       |       |        |        |
|-------|-------|--------|--------|
| Point | Image | Vx     | Vy     |
| 17    | 1     | -1.147 | -1.339 |
| 17    | 2     | -0.570 | -1.889 |

|       |       |       |        |
|-------|-------|-------|--------|
| Point | Image | Vx    | Vy     |
| 18    | 1     | 1.291 | 0.271  |
| 18    | 2     | 1.859 | -0.568 |

|       |       |       |        |
|-------|-------|-------|--------|
| Point | Image | Vx    | Vy     |
| 19    | 1     | 0.446 | -0.450 |
| 19    | 2     | 0.218 | 0.635  |

|       |       |       |        |
|-------|-------|-------|--------|
| Point | Image | Vx    | Vy     |
| 20    | 1     | 1.396 | -0.988 |
| 20    | 2     | 0.252 | 1.702  |

|       |       |        |        |
|-------|-------|--------|--------|
| Point | Image | Vx     | Vy     |
| 21    | 1     | -2.236 | -0.346 |
| 21    | 2     | 0.615  | 0.084  |

|       |       |       |        |
|-------|-------|-------|--------|
| Point | Image | Vx    | Vy     |
| 22    | 1     | 1.045 | -1.042 |
| 22    | 2     | 1.748 | 0.410  |

|       |       |       |        |
|-------|-------|-------|--------|
| Point | Image | Vx    | Vy     |
| 23    | 1     | 1.089 | -2.079 |
| 23    | 2     | 0.464 | -1.944 |

|       |       |        |       |
|-------|-------|--------|-------|
| Point | Image | Vx     | Vy    |
| 24    | 1     | 0.943  | 1.857 |
| 24    | 2     | -0.389 | 0.667 |

|       |       |        |        |
|-------|-------|--------|--------|
| Point | Image | Vx     | Vy     |
| 25    | 1     | 1.188  | -0.879 |
| 25    | 2     | -0.569 | -1.036 |

|       |       |        |       |
|-------|-------|--------|-------|
| Point | Image | Vx     | Vy    |
| 26    | 1     | -1.560 | 0.555 |
| 26    | 2     | -2.147 | 1.569 |

|       |       |        |        |
|-------|-------|--------|--------|
| Point | Image | Vx     | Vy     |
| 27    | 1     | -0.911 | 0.414  |
| 27    | 2     | 1.597  | -2.258 |

|       |       |       |       |
|-------|-------|-------|-------|
| Point | Image | Vx    | Vy    |
| 28    | 1     | 0.462 | 1.027 |
| 28    | 2     | 0.321 | 1.902 |

|       |       |        |        |
|-------|-------|--------|--------|
| Point | Image | Vx     | Vy     |
| 29    | 1     | -2.125 | -0.319 |
| 29    | 2     | -1.179 | 1.190  |

|       |       |        |        |
|-------|-------|--------|--------|
| Point | Image | Vx     | Vy     |
| 30    | 1     | 1.309  | 3.017  |
| 30    | 2     | -1.170 | -2.068 |

|       |       |        |        |
|-------|-------|--------|--------|
| Point | Image | Vx     | Vy     |
| 31    | 1     | -2.673 | 1.612  |
| 31    | 2     | 1.092  | -1.405 |

|       |       |       |       |
|-------|-------|-------|-------|
| Point | Image | Vx    | Vy    |
| 32    | 1     | 0.826 | 0.545 |
| 32    | 2     | 2.090 | 0.320 |

|       |       |       |        |
|-------|-------|-------|--------|
| Point | Image | Vx    | Vy     |
| 33    | 1     | 0.009 | -0.332 |
| 33    | 2     | 0.667 | 0.040  |

|       |       |       |        |
|-------|-------|-------|--------|
| Point | Image | Vx    | Vy     |
| 34    | 1     | 0.007 | -0.270 |
| 34    | 2     | 0.074 | 0.187  |

| Point | Image | Vx      | Vy     |       |       |        |        |
|-------|-------|---------|--------|-------|-------|--------|--------|
| 35    | 1     | -0.079  | 2.950  | 36    | 2     | -0.081 | 0.639  |
| 35    | 2     | -14.804 | 1.453  |       |       |        |        |
| Point | Image | Vx      | Vy     | Point | Image | Vx     | Vy     |
| 36    | 1     | 0.018   | -0.670 | 37    | 1     | -0.005 | 0.195  |
|       |       |         |        | 37    | 2     | 1.977  | -0.580 |

Total mean error of 72 image points: ax=0.000, ay=-0.000  
Total RMSE of 72 image points: mx=2.159, my=1.363

The image residuals of the control points

| The image ID = 1 |        |        |  |
|------------------|--------|--------|--|
| Point ID         | Vx     | Vy     |  |
| 1                | 0.921  | -2.447 |  |
| 3                | 0.759  | 3.362  |  |
| 4                | -2.241 | -0.724 |  |
| 5                | -1.952 | -0.254 |  |
| 6                | 0.939  | -0.791 |  |
| 7                | -0.009 | -0.123 |  |
| 8                | 0.474  | 2.868  |  |
| 9                | 0.049  | -0.424 |  |
| 10               | 1.420  | -1.736 |  |
| 11               | 0.061  | -1.986 |  |
| 12               | -0.793 | -0.459 |  |
| 13               | 1.363  | -0.646 |  |
| 14               | -1.071 | 0.202  |  |
| 15               | 1.758  | 0.367  |  |
| 16               | -0.970 | -0.936 |  |
| 17               | -1.147 | -1.339 |  |
| 18               | 1.291  | 0.271  |  |
| 19               | 0.446  | -0.450 |  |
| 20               | 1.396  | -0.988 |  |
| 21               | -2.236 | -0.346 |  |
| 22               | 1.045  | -1.042 |  |
| 23               | 1.089  | -2.079 |  |
| 24               | 0.943  | 1.857  |  |
| 25               | 1.188  | -0.879 |  |
| 26               | -1.560 | 0.555  |  |
| 27               | -0.911 | 0.414  |  |
| 28               | 0.462  | 1.027  |  |
| 29               | -2.125 | -0.319 |  |
| 30               | 1.309  | 3.017  |  |
| 31               | -2.673 | 1.612  |  |
| 32               | 0.826  | 0.545  |  |
| 33               | 0.009  | -0.332 |  |
| 34               | 0.007  | -0.270 |  |
| 35               | -0.079 | 2.950  |  |
| 36               | 0.018  | -0.670 |  |
| 37               | -0.005 | 0.195  |  |

RMSE of 36 points: mx=1.217, my=1.408

| The image ID = 2 |         |        |  |
|------------------|---------|--------|--|
| Point ID         | Vx      | Vy     |  |
| 1                | 2.078   | -1.980 |  |
| 3                | 0.723   | 1.093  |  |
| 4                | -0.189  | 0.469  |  |
| 5                | -2.986  | -3.135 |  |
| 6                | 0.032   | -0.803 |  |
| 7                | -0.022  | 0.631  |  |
| 8                | -0.203  | 1.715  |  |
| 9                | 0.069   | 0.354  |  |
| 10               | 0.907   | -0.560 |  |
| 11               | 0.708   | -1.422 |  |
| 12               | 2.054   | 0.610  |  |
| 13               | 2.620   | 1.695  |  |
| 14               | 0.125   | 1.713  |  |
| 15               | 2.884   | 0.350  |  |
| 16               | -0.860  | 0.219  |  |
| 17               | -0.570  | -1.889 |  |
| 18               | 1.859   | -0.568 |  |
| 19               | 0.218   | 0.635  |  |
| 20               | 0.252   | 1.702  |  |
| 21               | 0.615   | 0.084  |  |
| 22               | 1.748   | 0.410  |  |
| 23               | 0.464   | -1.944 |  |
| 24               | -0.389  | 0.667  |  |
| 25               | -0.569  | -1.036 |  |
| 26               | -2.147  | 1.569  |  |
| 27               | 1.597   | -2.258 |  |
| 28               | 0.321   | 1.902  |  |
| 29               | -1.179  | 1.190  |  |
| 30               | -1.170  | -2.068 |  |
| 31               | 1.092   | -1.405 |  |
| 32               | 2.090   | 0.320  |  |
| 33               | 0.667   | 0.040  |  |
| 34               | 0.074   | 0.187  |  |
| 35               | -14.804 | 1.453  |  |
| 36               | -0.081  | 0.639  |  |
| 37               | 1.977   | -0.580 |  |

RMSE of 36 points: mx=2.801, my=1.317

Total number of all control image points = 72  
Total rmsex = 2.159, rmsey = 1.363

# Area around Tell Hammam et Turkman

The Triangulation Report With LPS

The output image x, y units: pixels

The output angle unit: degrees

The output ground X, Y, Z units: meters

The Input Image Coordinates

image ID = 1

| Point ID | x       | y       |    |         |         |
|----------|---------|---------|----|---------|---------|
| 1        | 48.030  | 285.957 | 45 | 272.934 | 48.181  |
| 2        | 260.017 | 42.045  | 46 | 272.724 | 86.029  |
| 3        | 65.017  | 42.128  | 47 | 287.955 | 92.976  |
| 4        | 39.823  | 215.893 | 48 | 275.710 | 115.009 |
| 5        | 114.040 | 369.069 | 49 | 143.302 | 256.103 |
| 6        | 244.484 | 615.957 | 50 | 138.038 | 273.391 |
| 7        | 66.854  | 500.011 | 51 | 114.566 | 287.018 |
| 8        | 123.619 | 619.875 | 52 | 129.885 | 305.495 |
| 9        | 118.451 | 446.500 | 53 | 141.091 | 316.093 |
| 10       | 69.765  | 339.780 | 54 | 282.418 | 174.666 |
| 11       | 308.179 | 199.886 | 55 | 184.672 | 318.784 |
| 12       | 213.833 | 400.988 | 56 | 325.690 | 420.344 |
| 13       | 205.981 | 470.050 | 57 | 130.634 | 490.783 |
| 14       | 148.105 | 232.597 | 58 | 129.786 | 542.825 |
| 15       | 229.152 | 134.033 | 59 | 131.793 | 560.469 |
| 16       | 271.374 | 30.230  | 60 | 120.486 | 572.412 |
| 17       | 140.873 | 31.013  | 61 | 126.626 | 589.027 |
| 18       | 81.722  | 27.011  | 62 | 254.435 | 568.066 |
| 19       | 99.613  | 107.998 | 63 | 250.336 | 605.139 |
| 20       | 18.629  | 88.475  | 64 | 305.375 | 603.738 |
| 21       | 88.049  | 293.126 | 65 | 244.918 | 637.797 |
| 22       | 110.831 | 265.958 | 66 | 251.968 | 656.010 |
| 23       | 108.151 | 166.125 | 67 | 185.241 | 18.623  |
| 24       | 19.842  | 45.966  | 68 | 189.927 | 36.576  |
| 25       | 272.095 | 94.997  | 69 | 206.441 | 39.851  |
| 26       | 291.732 | 138.781 | 70 | 235.183 | 127.594 |
| 27       | 250.007 | 576.033 | 71 | 294.079 | 129.330 |
| 28       | 324.961 | 674.026 | 72 | 107.108 | 370.651 |
| 30       | 288.263 | 436.797 | 73 | 309.729 | 280.857 |
| 31       | 316.000 | 484.010 | 74 | 115.547 | 446.973 |
| 32       | 253.272 | 210.849 | 75 | 314.098 | 494.599 |
| 33       | 283.172 | 356.983 | 76 | 238.086 | 562.349 |
| 34       | 182.017 | 201.904 | 77 | 186.545 | 592.974 |
| 35       | 172.420 | 132.348 | 78 | 223.706 | 608.007 |
| 36       | 251.183 | 274.783 | 79 | 178.643 | 223.432 |
| 37       | 171.739 | 326.859 | 80 | 165.235 | 644.402 |
| 39       | 84.505  | 26.345  | 81 | 321.319 | 663.960 |
| 40       | 140.990 | 33.412  | 82 | 281.007 | 58.659  |
| 41       | 81.708  | 43.215  | 83 | 298.441 | 222.718 |
| 42       | 172.951 | 168.845 | 84 | 247.294 | 583.311 |
| 43       | 251.078 | 22.998  | 85 | 301.921 | 589.732 |
| 44       | 285.367 | 24.540  | 86 | 321.388 | 606.026 |

Affine coefficients from file (pixels) to film (millimeters)

|         |          |          |         |          |          |
|---------|----------|----------|---------|----------|----------|
| A0      | A1       | A2       | B0      | B1       | B2       |
| -2.3800 | 0.000000 | 0.007000 | -1.2530 | 0.007000 | 0.000000 |

image ID = 2

| Point ID | x       | y       |    |         |         |
|----------|---------|---------|----|---------|---------|
| 1        | 25.873  | 329.915 | 45 | 289.504 | 60.157  |
| 2        | 277.104 | 56.025  | 46 | 284.251 | 96.939  |
| 3        | 72.826  | 89.055  | 47 | 299.714 | 101.184 |
| 4        | 24.529  | 261.669 | 48 | 283.833 | 124.799 |
| 5        | 82.000  | 397.866 | 49 | 128.334 | 283.169 |
| 6        | 188.946 | 615.733 | 50 | 121.067 | 301.017 |
| 7        | 19.765  | 533.967 | 51 | 94.517  | 318.308 |
| 8        | 62.798  | 639.294 | 52 | 108.354 | 333.627 |
| 9        | 78.208  | 474.505 | 53 | 118.501 | 341.949 |
| 10       | 41.407  | 379.468 | 54 | 283.248 | 181.362 |
| 11       | 307.008 | 200.867 | 55 | 163.654 | 337.192 |
| 12       | 182.909 | 419.908 | 56 | 297.586 | 411.762 |
| 13       | 166.080 | 482.941 | 57 | 86.611  | 512.960 |
| 14       | 134.426 | 260.157 | 58 | 80.761  | 569.213 |
| 15       | 234.202 | 150.952 | 59 | 79.252  | 580.617 |
| 16       | 290.137 | 43.010  | 60 | 66.292  | 593.925 |
| 17       | 153.741 | 64.896  | 61 | 70.177  | 609.065 |
| 18       | 92.817  | 70.730  | 62 | 205.744 | 567.060 |
| 19       | 102.343 | 146.927 | 63 | 196.658 | 603.934 |
| 20       | 16.307  | 142.719 | 64 | 254.138 | 592.931 |
| 21       | 66.711  | 329.934 | 65 | 187.091 | 636.153 |
| 22       | 92.075  | 295.983 | 66 | 192.202 | 652.785 |
| 23       | 101.027 | 203.518 | 67 | 201.510 | 45.087  |
| 24       | 25.821  | 101.922 | 68 | 204.370 | 61.787  |
| 25       | 283.196 | 105.980 | 69 | 221.105 | 62.190  |
| 26       | 297.041 | 144.963 | 70 | 240.243 | 143.086 |
| 27       | 197.889 | 576.020 | 71 | 301.127 | 135.501 |
| 28       | 265.753 | 658.547 | 72 | 76.345  | 401.161 |
| 30       | 256.749 | 437.091 | 73 | 298.534 | 279.159 |
| 31       | 279.845 | 475.047 | 74 | 75.489  | 474.553 |
| 32       | 251.034 | 222.811 | 75 | 277.248 | 486.489 |
| 33       | 261.448 | 356.520 | 76 | 189.763 | 563.986 |
| 34       | 174.727 | 225.113 | 77 | 131.877 | 602.472 |
| 35       | 174.040 | 161.694 | 78 | 168.398 | 611.395 |
| 36       | 241.002 | 283.703 | 79 | 169.270 | 245.247 |
| 37       | 148.503 | 346.910 | 80 | 103.217 | 656.262 |
| 39       | 95.711  | 69.605  | 81 | 263.011 | 649.057 |
| 40       | 153.797 | 66.727  | 82 | 296.504 | 69.094  |
| 41       | 90.823  | 86.835  | 83 | 294.171 | 224.318 |
| 42       | 170.512 | 193.459 | 84 | 196.147 | 582.788 |
| 43       | 269.591 | 39.034  | 85 | 252.347 | 579.766 |
| 44       | 305.270 | 34.815  | 86 | 270.560 | 592.240 |

Affine coefficients from file (pixels) to film (millimeters)

| A0      | A1       | A2       | B0      | B1       | B2       |
|---------|----------|----------|---------|----------|----------|
| -2.4080 | 0.000000 | 0.007000 | -1.2250 | 0.007000 | 0.000000 |

#### THE OUTPUT OF SELF-CALIBRATING BUNDLE BLOCK ADJUSTMENT

the no. of iteration =1    the standard error = 1.1530  
the maximal correction of the object points = 0.00000

the no. of iteration =2    the standard error = 1.1530  
the maximal correction of the object points = 0.00000

| The exterior orientation parameters |    |    |    |       |              |
|-------------------------------------|----|----|----|-------|--------------|
| image ID                            | Xs | Ys | Zs | OMEGA | PHI    KAPPA |



1 408742.8180 3986422.9817 154316.5211 558.3953 -149.3423 467.4995  
 2 400367.1537 4072756.3707 154047.2375 -12.8510 -33.5628 -82.0861

The interior orientation parameters of photos

image ID f(mm) xo(mm) yo(mm)

1 609.6020 0.0000 0.0000

2 609.6020 0.0000 0.0000

The residuals of the control points

Point ID rX rY rZ

All residuals of fixed GCP are zero.

The difference of intersected and measured control points

Point ID rX rY rZ

|    |         |         |          |    |         |         |         |
|----|---------|---------|----------|----|---------|---------|---------|
| 1  | -1.1911 | -0.1472 | 0.9960   | 45 | -0.9925 | 0.3457  | 1.5532  |
| 2  | 2.2922  | 1.2160  | -2.9622  | 46 | -0.6616 | 0.2348  | 1.0585  |
| 3  | -0.6217 | -2.3927 | -0.2114  | 47 | -0.6672 | 0.2605  | 1.1745  |
| 4  | 1.9162  | 0.5260  | -2.4775  | 48 | -0.4381 | 0.1645  | 0.7436  |
| 5  | -0.7428 | -2.8913 | 0.7991   | 49 | 0.3532  | -0.1480 | -0.6690 |
| 6  | -0.3669 | 5.0345  | 5.0917   | 50 | 0.3339  | -0.1380 | -0.6162 |
| 7  | 1.0755  | 0.0944  | -0.5317  | 51 | 0.3227  | -0.1139 | -0.5052 |
| 8  | 4.8476  | -2.1632 | -0.9422  | 52 | 0.2687  | -0.1061 | -0.4734 |
| 9  | -1.0322 | -4.8172 | 8.2427   | 53 | 0.2520  | -0.1058 | -0.4784 |
| 10 | -3.1943 | -2.2674 | 3.0674   | 54 | -0.0365 | 0.0372  | 0.1835  |
| 11 | 0.0544  | -0.3683 | -1.8784  | 55 | 0.3192  | -0.1430 | -0.6464 |
| 12 | 0.9797  | 5.5021  | 14.6123  | 56 | 1.2266  | -0.3537 | -1.4958 |
| 13 | 5.7990  | 1.2292  | 0.9915   | 57 | -0.6200 | 0.2136  | 0.9319  |
| 14 | -1.3482 | 5.6486  | 0.8672   | 58 | -1.2416 | 0.4278  | 1.8894  |
| 15 | -0.4469 | -1.4183 | 2.4339   | 59 | -1.1650 | 0.4054  | 1.7589  |
| 16 | -1.7225 | 1.0940  | 7.1142   | 60 | -1.3846 | 0.4930  | 2.1477  |
| 17 | 1.2705  | -2.0146 | -2.0506  | 61 | -1.4759 | 0.5210  | 2.2560  |
| 18 | 0.8431  | -1.6200 | -1.6644  | 62 | 0.2700  | -0.1193 | -0.5318 |
| 19 | 3.4196  | 11.1686 | -10.8796 | 63 | 0.0239  | -0.0421 | -0.1975 |
| 20 | 1.4120  | -2.4580 | 0.6482   | 64 | 0.9077  | -0.3039 | -1.3062 |
| 21 | -5.3473 | -2.9701 | -6.1039  | 65 | -0.2259 | 0.0391  | 0.1491  |
| 22 | 1.0936  | 3.9081  | -13.1910 | 66 | -0.2317 | 0.0410  | 0.1563  |
| 23 | 8.0098  | -4.8687 | -11.2411 | 67 | -0.5507 | 0.1224  | 0.5162  |
| 24 | 1.5290  | 1.7276  | 6.1236   | 68 | -0.4788 | 0.1022  | 0.4288  |
| 25 | -0.5446 | -1.6586 | -1.0070  | 69 | -0.5989 | 0.1503  | 0.6480  |
| 26 | 4.3684  | -8.5731 | -1.0118  | 70 | -0.2072 | 0.0457  | 0.1920  |
| 27 | -5.2509 | -0.6111 | 3.4986   | 71 | -0.3864 | 0.1727  | 0.7941  |
| 28 | -1.5303 | -0.7535 | 1.2235   | 72 | -0.0217 | 0.0225  | 0.1045  |
| 30 | 1.1938  | 2.5153  | -10.0748 | 73 | 0.6125  | -0.1486 | -0.6168 |
| 31 | 1.2859  | -3.9106 | -13.7370 | 74 | -0.4575 | 0.1730  | 0.7575  |
| 32 | -3.4749 | 4.8576  | 12.4370  | 75 | 1.1789  | -0.3617 | -1.5730 |
| 33 | 6.5816  | 0.7969  | -5.5177  | 76 | 0.0934  | -0.0635 | -0.2967 |
| 34 | 1.9156  | 0.0438  | -0.7195  | 77 | -0.7679 | 0.2320  | 0.9837  |
| 35 | -9.1040 | 0.8567  | 11.2909  | 78 | -0.3950 | 0.0954  | 0.3935  |
| 36 | -4.4947 | -1.8855 | 2.4307   | 79 | 0.2946  | -0.1401 | -0.6406 |
| 37 | -2.8607 | -0.3655 | -4.1965  | 80 | -1.5049 | 0.4984  | 2.1313  |
| 39 | 0.5618  | -0.2199 | -0.9912  | 81 | 0.9495  | -0.3162 | -1.3466 |
| 40 | -0.0392 | -0.0490 | -0.2482  | 82 | -0.9416 | 0.3403  | 1.5326  |
| 41 | 0.6369  | -0.2390 | -1.0649  | 83 | 0.2629  | -0.0412 | -0.1533 |
| 42 | 0.2098  | -0.1169 | -0.5388  | 84 | 0.1102  | -0.0703 | -0.3161 |
| 43 | -1.0758 | 0.3442  | 1.5389   | 85 | 0.9027  | -0.3023 | -1.3022 |
| 44 | -1.3175 | 0.4704  | 2.1269   | 86 | 1.1779  | -0.3769 | -1.6135 |

aX aY aZ  
 -0.0000 -0.0000 -0.0000

|        |        |        |
|--------|--------|--------|
| mX     | mY     | mZ     |
| 2.3103 | 2.3402 | 4.3616 |
| CE90   | LE90   |        |
| 5.0199 | 7.2113 |        |

The image residuals of intersected GCP

| Point | Image | Vx     | Vy     |
|-------|-------|--------|--------|
| 1     | 1     | 0.386  | 0.020  |
| 1     | 2     | -0.381 | -0.069 |

| Point | Image | Vx     | Vy     |
|-------|-------|--------|--------|
| 2     | 1     | 0.200  | 0.010  |
| 2     | 2     | -0.198 | -0.036 |

| Point | Image | Vx     | Vy     |
|-------|-------|--------|--------|
| 3     | 1     | -0.115 | -0.006 |
| 3     | 2     | 0.113  | 0.021  |

| Point | Image | Vx     | Vy     |
|-------|-------|--------|--------|
| 4     | 1     | -0.450 | -0.023 |
| 4     | 2     | 0.445  | 0.081  |

| Point | Image | Vx     | Vy     |
|-------|-------|--------|--------|
| 5     | 1     | -0.954 | -0.049 |
| 5     | 2     | 0.943  | 0.171  |

| Point | Image | Vx     | Vy     |
|-------|-------|--------|--------|
| 6     | 1     | -0.127 | -0.007 |
| 6     | 2     | 0.125  | 0.023  |

| Point | Image | Vx     | Vy     |
|-------|-------|--------|--------|
| 7     | 1     | 0.657  | 0.034  |
| 7     | 2     | -0.649 | -0.118 |

| Point | Image | Vx     | Vy     |
|-------|-------|--------|--------|
| 8     | 1     | -0.096 | -0.005 |
| 8     | 2     | 0.095  | 0.017  |

| Point | Image | Vx     | Vy     |
|-------|-------|--------|--------|
| 9     | 1     | -0.177 | -0.009 |
| 9     | 2     | 0.175  | 0.032  |

| Point | Image | Vx     | Vy     |
|-------|-------|--------|--------|
| 10    | 1     | 0.230  | 0.012  |
| 10    | 2     | -0.227 | -0.041 |

| Point | Image | Vx     | Vy     |
|-------|-------|--------|--------|
| 11    | 1     | -0.197 | -0.010 |
| 11    | 2     | 0.194  | 0.035  |

| Point | Image | Vx     | Vy     |
|-------|-------|--------|--------|
| 12    | 1     | 0.163  | 0.008  |
| 12    | 2     | -0.161 | -0.029 |

| Point | Image | Vx     | Vy     |
|-------|-------|--------|--------|
| 13    | 1     | -0.350 | -0.018 |
| 13    | 2     | 0.346  | 0.063  |

| Point | Image | Vx     | Vy     |
|-------|-------|--------|--------|
| 14    | 1     | -0.887 | -0.046 |
| 14    | 2     | 0.876  | 0.159  |

| Point | Image | Vx     | Vy     |
|-------|-------|--------|--------|
| 15    | 1     | 0.601  | 0.031  |
| 15    | 2     | -0.593 | -0.108 |

| Point | Image | Vx     | Vy     |
|-------|-------|--------|--------|
| 16    | 1     | 0.088  | 0.005  |
| 16    | 2     | -0.087 | -0.016 |

| Point | Image | Vx     | Vy     |
|-------|-------|--------|--------|
| 17    | 1     | 0.004  | 0.000  |
| 17    | 2     | -0.004 | -0.001 |

| Point | Image | Vx     | Vy     |
|-------|-------|--------|--------|
| 18    | 1     | 0.150  | 0.008  |
| 18    | 2     | -0.148 | -0.027 |

| Point | Image | Vx     | Vy     |
|-------|-------|--------|--------|
| 19    | 1     | 0.610  | 0.032  |
| 19    | 2     | -0.602 | -0.109 |

| Point | Image | Vx     | Vy     |
|-------|-------|--------|--------|
| 20    | 1     | -1.219 | -0.064 |
| 20    | 2     | 1.203  | 0.218  |

| Point | Image | Vx     | Vy     |
|-------|-------|--------|--------|
| 21    | 1     | 0.367  | 0.019  |
| 21    | 2     | -0.362 | -0.066 |

| Point | Image | Vx     | Vy     |
|-------|-------|--------|--------|
| 22    | 1     | -0.823 | -0.043 |
| 22    | 2     | 0.813  | 0.147  |

| Point | Image | Vx     | Vy     |
|-------|-------|--------|--------|
| 23    | 1     | -0.749 | -0.039 |
| 23    | 2     | 0.739  | 0.134  |

| Point | Image | Vx     | Vy     |
|-------|-------|--------|--------|
| 24    | 1     | 0.328  | 0.017  |
| 24    | 2     | -0.324 | -0.059 |

| Point | Image | Vx     | Vy     |
|-------|-------|--------|--------|
| 25    | 1     | 0.280  | 0.014  |
| 25    | 2     | -0.276 | -0.050 |

| Point | Image | Vx     | Vy     |
|-------|-------|--------|--------|
| 26    | 1     | -0.336 | -0.017 |
| 26    | 2     | 0.332  | 0.060  |

| Point | Image | Vx     | Vy     |
|-------|-------|--------|--------|
| 27    | 1     | -1.000 | -0.052 |
| 27    | 2     | 0.989  | 0.180  |

| Point | Image | Vx     | Vy     |
|-------|-------|--------|--------|
| 28    | 1     | -0.004 | -0.000 |
| 28    | 2     | 0.004  | 0.001  |

| Point | Image | Vx     | Vy     |
|-------|-------|--------|--------|
| 30    | 1     | 0.063  | 0.003  |
| 30    | 2     | -0.062 | -0.011 |

| Point | Image | Vx     | Vy     |
|-------|-------|--------|--------|
| 31    | 1     | -0.189 | -0.010 |
| 31    | 2     | 0.187  | 0.034  |

| Point | Image | Vx     | Vy     |
|-------|-------|--------|--------|
| 32    | 1     | 1.307  | 0.067  |
| 32    | 2     | -1.290 | -0.234 |

| Point | Image | Vx     | Vy     |
|-------|-------|--------|--------|
| 33    | 1     | -0.253 | -0.013 |
| 33    | 2     | 0.250  | 0.046  |

| Point | Image | Vx     | Vy     |
|-------|-------|--------|--------|
| 34    | 1     | -0.292 | -0.015 |
| 34    | 2     | 0.288  | 0.052  |

| Point | Image | Vx     | Vy     |
|-------|-------|--------|--------|
| 35    | 1     | 0.283  | 0.015  |
| 35    | 2     | -0.279 | -0.051 |

| Point | Image | Vx     | Vy     |
|-------|-------|--------|--------|
| 36    | 1     | 1.214  | 0.062  |
| 36    | 2     | -1.199 | -0.218 |

| Point | Image | Vx     | Vy     |
|-------|-------|--------|--------|
| 37    | 1     | -0.420 | -0.022 |
| 37    | 2     | 0.415  | 0.075  |

| Point | Image | Vx     | Vy     |
|-------|-------|--------|--------|
| 39    | 1     | 0.103  | 0.005  |
| 39    | 2     | -0.102 | -0.018 |

| Point | Image | Vx     | Vy     |
|-------|-------|--------|--------|
| 40    | 1     | 0.075  | 0.004  |
| 40    | 2     | -0.074 | -0.013 |

| Point | Image | Vx     | Vy     |
|-------|-------|--------|--------|
| 41    | 1     | 0.191  | 0.010  |
| 41    | 2     | -0.189 | -0.034 |

| Point | Image | Vx     | Vy     |
|-------|-------|--------|--------|
| 42    | 1     | 0.177  | 0.009  |
| 42    | 2     | -0.175 | -0.032 |

| Point | Image | Vx     | Vy     |
|-------|-------|--------|--------|
| 43    | 1     | -0.066 | -0.003 |
| 43    | 2     | 0.065  | 0.012  |

| Point | Image | Vx     | Vy     |
|-------|-------|--------|--------|
| 44    | 1     | -0.033 | -0.002 |
| 44    | 2     | 0.033  | 0.006  |

| Point | Image | Vx     | Vy     |
|-------|-------|--------|--------|
| 45    | 1     | 0.070  | 0.004  |
| 45    | 2     | -0.070 | -0.013 |

| Point | Image | Vx     | Vy     |
|-------|-------|--------|--------|
| 46    | 1     | -0.092 | -0.005 |
| 46    | 2     | 0.091  | 0.017  |

| Point | Image | Vx     | Vy     |
|-------|-------|--------|--------|
| 47    | 1     | 0.121  | 0.006  |
| 47    | 2     | -0.120 | -0.022 |

| Point | Image | Vx     | Vy     |
|-------|-------|--------|--------|
| 48    | 1     | -0.040 | -0.002 |
| 48    | 2     | 0.039  | 0.007  |

| Point | Image | Vx     | Vy     |
|-------|-------|--------|--------|
| 49    | 1     | -0.046 | -0.002 |
| 49    | 2     | 0.046  | 0.008  |

| Point | Image | Vx     | Vy     |
|-------|-------|--------|--------|
| 50    | 1     | 0.147  | 0.008  |
| 50    | 2     | -0.145 | -0.026 |

| Point | Image | Vx     | Vy     |
|-------|-------|--------|--------|
| 51    | 1     | -0.036 | -0.002 |
| 51    | 2     | 0.035  | 0.006  |

| Point | Image | Vx     | Vy     |
|-------|-------|--------|--------|
| 52    | 1     | 0.033  | 0.002  |
| 52    | 2     | -0.032 | -0.006 |

| Point | Image | Vx     | Vy     |
|-------|-------|--------|--------|
| 53    | 1     | -0.085 | -0.004 |
| 53    | 2     | 0.084  | 0.015  |

| Point | Image | Vx     | Vy     |
|-------|-------|--------|--------|
| 54    | 1     | -0.145 | -0.007 |
| 54    | 2     | 0.143  | 0.026  |

| Point | Image | Vx     | Vy     |
|-------|-------|--------|--------|
| 55    | 1     | -0.066 | -0.003 |
| 55    | 2     | 0.065  | 0.012  |

| Point | Image | Vx     | Vy     |
|-------|-------|--------|--------|
| 56    | 1     | -0.321 | -0.016 |
| 56    | 2     | 0.317  | 0.058  |

| Point | Image | Vx     | Vy     |
|-------|-------|--------|--------|
| 57    | 1     | 0.184  | 0.010  |
| 57    | 2     | -0.182 | -0.033 |

| Point | Image | Vx     | Vy     |
|-------|-------|--------|--------|
| 58    | 1     | 1.404  | 0.073  |
| 58    | 2     | -1.389 | -0.252 |

| Point | Image | Vx     | Vy     |
|-------|-------|--------|--------|
| 59    | 1     | 0.229  | 0.012  |
| 59    | 2     | -0.226 | -0.041 |

| Point | Image | Vx     | Vy     |
|-------|-------|--------|--------|
| 60    | 1     | 0.355  | 0.018  |
| 60    | 2     | -0.351 | -0.064 |

| Point | Image | Vx     | Vy     |
|-------|-------|--------|--------|
| 61    | 1     | 0.136  | 0.007  |
| 61    | 2     | -0.135 | -0.024 |

| Point | Image | Vx     | Vy     |
|-------|-------|--------|--------|
| 62    | 1     | 0.063  | 0.003  |
| 62    | 2     | -0.063 | -0.011 |

| Point | Image | Vx     | Vy     |
|-------|-------|--------|--------|
| 63    | 1     | -0.020 | -0.001 |
| 63    | 2     | 0.020  | 0.004  |

| Point | Image | Vx     | Vy     |
|-------|-------|--------|--------|
| 64    | 1     | -0.059 | -0.003 |
| 64    | 2     | 0.059  | 0.011  |

| Point | Image | Vx     | Vy     |
|-------|-------|--------|--------|
| 65    | 1     | 0.011  | 0.001  |
| 65    | 2     | -0.011 | -0.002 |

| Point | Image | Vx     | Vy     |
|-------|-------|--------|--------|
| 66    | 1     | 0.042  | 0.002  |
| 66    | 2     | -0.041 | -0.008 |

| Point | Image | Vx     | Vy     |
|-------|-------|--------|--------|
| 67    | 1     | -0.069 | -0.004 |
| 67    | 2     | 0.069  | 0.012  |

| Point | Image | Vx     | Vy     |
|-------|-------|--------|--------|
| 68    | 1     | 0.028  | 0.001  |
| 68    | 2     | -0.028 | -0.005 |

| Point | Image | Vx     | Vy     |
|-------|-------|--------|--------|
| 69    | 1     | -0.022 | -0.001 |
| 69    | 2     | 0.022  | 0.004  |

| Point | Image | Vx     | Vy     |
|-------|-------|--------|--------|
| 70    | 1     | 0.030  | 0.002  |
| 70    | 2     | -0.029 | -0.005 |

| Point | Image | Vx     | Vy     |
|-------|-------|--------|--------|
| 71    | 1     | -0.100 | -0.005 |
| 71    | 2     | 0.099  | 0.018  |

| Point | Image | Vx     | Vy     |
|-------|-------|--------|--------|
| 72    | 1     | -0.034 | -0.002 |
| 72    | 2     | 0.033  | 0.006  |

| Point | Image | Vx     | Vy     |
|-------|-------|--------|--------|
| 73    | 1     | -0.206 | -0.011 |
| 73    | 2     | 0.204  | 0.037  |

| Point | Image | Vx     | Vy     |
|-------|-------|--------|--------|
| 74    | 1     | -0.079 | -0.004 |
| 74    | 2     | 0.078  | 0.014  |

| Point | Image | Vx     | Vy     |
|-------|-------|--------|--------|
| 75    | 1     | 0.232  | 0.012  |
| 75    | 2     | -0.230 | -0.042 |

| Point | Image | Vx     | Vy     |
|-------|-------|--------|--------|
| 76    | 1     | 0.204  | 0.010  |
| 76    | 2     | -0.202 | -0.037 |

| Point | Image | Vx     | Vy     |
|-------|-------|--------|--------|
| 77    | 1     | 0.009  | 0.000  |
| 77    | 2     | -0.009 | -0.002 |

| Point | Image | Vx     | Vy     |
|-------|-------|--------|--------|
| 78    | 1     | -0.089 | -0.005 |
| 78    | 2     | 0.088  | 0.016  |

| Point | Image | Vx     | Vy     |
|-------|-------|--------|--------|
| 79    | 1     | -0.054 | -0.003 |
| 79    | 2     | 0.053  | 0.010  |

| Point | Image | Vx     | Vy     |
|-------|-------|--------|--------|
| 80    | 1     | -0.014 | -0.001 |
| 80    | 2     | 0.014  | 0.003  |

| Point | Image | Vx     | Vy     |
|-------|-------|--------|--------|
| 81    | 1     | -0.135 | -0.007 |
| 81    | 2     | 0.133  | 0.024  |

| Point | Image | Vx     | Vy     |
|-------|-------|--------|--------|
| 82    | 1     | 0.018  | 0.001  |
| 82    | 2     | -0.018 | -0.003 |

| Point | Image | Vx     | Vy     |
|-------|-------|--------|--------|
| 83    | 1     | -0.146 | -0.008 |
| 83    | 2     | 0.144  | 0.026  |

| Point | Image | Vx     | Vy     |
|-------|-------|--------|--------|
| 84    | 1     | -0.091 | -0.005 |
| 84    | 2     | 0.090  | 0.016  |

| Point | Image | Vx     | Vy     |
|-------|-------|--------|--------|
| 85    | 1     | -0.043 | -0.002 |
| 85    | 2     | 0.042  | 0.008  |

| Point | Image | Vx     | Vy     |
|-------|-------|--------|--------|
| 86    | 1     | -0.064 | -0.003 |
| 86    | 2     | 0.063  | 0.012  |

Mean error of 168 image points:  $a_x=0.000$ ,  $a_y=-0.000$   
 RMSE of 168 image points:  $m_x=0.407$ ,  $m_y=0.054$

| The coordinates of object points |             |              |          |         |
|----------------------------------|-------------|--------------|----------|---------|
| Point ID                         | X           | Y            | Z        | Overlap |
| 1                                | 504601.3250 | 4037669.0860 | 306.0000 | 2       |
| 2                                | 505052.5800 | 4038347.5600 | 303.0000 | 2       |
| 3                                | 504560.1430 | 4038215.2890 | 302.0000 | 2       |
| 4                                | 504554.8350 | 4037816.9070 | 303.0000 | 2       |
| 5                                | 504797.2240 | 4037537.5470 | 300.0000 | 2       |
| 6                                | 505213.9090 | 4037081.2640 | 298.0000 | 2       |
| 7                                | 504722.5890 | 4037216.5340 | 307.0000 | 2       |
| 8                                | 504905.0130 | 4036997.9320 | 303.0000 | 2       |
| 9                                | 504831.8560 | 4037371.3390 | 302.0000 | 2       |
| 10                               | 504674.1500 | 4037567.5760 | 308.0000 | 2       |
| 11                               | 505232.3640 | 4038038.5190 | 300.0000 | 2       |
| 12                               | 505042.7030 | 4037518.5000 | 317.0000 | 2       |
| 13                               | 505053.7480 | 4037373.5860 | 310.0000 | 2       |
| 14                               | 504835.6790 | 4037849.1950 | 301.0000 | 2       |
| 15                               | 505009.4760 | 4038127.9510 | 299.0000 | 2       |
| 16                               | 505080.0051 | 4038380.7582 | 294.4476 | 2       |
| 17                               | 504748.2140 | 4038292.6020 | 301.0000 | 2       |
| 18                               | 504598.4150 | 4038260.3100 | 300.0000 | 2       |
| 19                               | 504669.5260 | 4038083.1060 | 311.0000 | 2       |
| 20                               | 504451.9930 | 4038080.4800 | 305.0000 | 2       |
| 21                               | 504709.7260 | 4037684.1300 | 312.0000 | 2       |
| 22                               | 504757.7240 | 4037756.3810 | 304.0000 | 2       |
| 23                               | 504699.2990 | 4037975.4160 | 318.0000 | 2       |
| 24                               | 504442.4200 | 4038169.7400 | 302.0000 | 2       |
| 25                               | 505103.5540 | 4038242.6550 | 303.0000 | 2       |
| 26                               | 505162.8080 | 4038167.6160 | 302.0000 | 2       |
| 27                               | 505216.9730 | 4037177.2680 | 299.0000 | 2       |
| 28                               | 505439.4980 | 4037015.5730 | 302.0000 | 2       |
| 30                               | 505256.2210 | 4037501.3480 | 321.0000 | 2       |
| 31                               | 505350.2370 | 4037427.9810 | 312.0000 | 2       |
| 32                               | 505099.1760 | 4037969.5730 | 294.0000 | 2       |
| 33                               | 505219.5190 | 4037678.7680 | 300.0000 | 2       |
| 34                               | 504908.1050 | 4037944.8880 | 304.0000 | 2       |
| 35                               | 504865.6920 | 4038086.0060 | 302.0000 | 2       |
| 36                               | 505120.7970 | 4037837.4620 | 298.0000 | 2       |
| 37                               | 504933.0930 | 4037667.4600 | 303.0000 | 2       |
| 39                               | 504605.4025 | 4038262.2718 | 299.2867 | 2       |
| 40                               | 504752.0607 | 4038286.1871 | 297.2395 | 2       |
| 41                               | 504603.5045 | 4038223.1687 | 300.7966 | 2       |
| 42                               | 504879.2514 | 4038012.5907 | 299.3855 | 2       |
| 43                               | 505025.7937 | 4038383.5631 | 298.7355 | 2       |
| 44                               | 505113.5749 | 4038403.8646 | 298.1568 | 2       |
| 45                               | 505089.5964 | 4038343.4715 | 299.8086 | 2       |
| 46                               | 505101.6684 | 4038260.8131 | 300.1463 | 2       |
| 47                               | 505143.2169 | 4038256.2719 | 300.1092 | 2       |
| 48                               | 505118.8175 | 4038199.4984 | 301.2222 | 2       |
| 49                               | 504833.8258 | 4037801.8444 | 299.9373 | 2       |
| 50                               | 504826.5944 | 4037760.4199 | 300.6578 | 2       |
| 51                               | 504771.1009 | 4037714.2482 | 301.2898 | 2       |
| 52                               | 504816.6639 | 4037684.6455 | 301.0486 | 2       |
| 53                               | 504848.6301 | 4037669.3086 | 300.7279 | 2       |
| 54                               | 505156.7022 | 4038074.4295 | 300.7174 | 2       |
| 55                               | 504960.1152 | 4037693.5902 | 300.4121 | 2       |
| 56                               | 505352.3288 | 4037569.7610 | 299.6881 | 2       |
| 57                               | 504884.7077 | 4037281.7180 | 299.6191 | 2       |
| 58                               | 504890.1439 | 4037160.8493 | 321.6576 | 2       |
| 59                               | 504911.5521 | 4037130.1840 | 300.5934 | 2       |
| 60                               | 504887.9938 | 4037096.6496 | 299.7169 | 2       |

|    |             |              |          |   |
|----|-------------|--------------|----------|---|
| 61 | 504908.5792 | 4037064.4077 | 300.0598 | 2 |
| 62 | 505224.0898 | 4037198.5350 | 300.6460 | 2 |
| 63 | 505225.7911 | 4037114.4425 | 301.7552 | 2 |
| 64 | 505365.0923 | 4037156.0039 | 300.7544 | 2 |
| 65 | 505224.4243 | 4037039.9356 | 300.4280 | 2 |
| 66 | 505248.2131 | 4037004.8579 | 301.2382 | 2 |
| 67 | 504858.6752 | 4038348.6288 | 297.0171 | 2 |
| 68 | 504876.9666 | 4038312.7757 | 297.1706 | 2 |
| 69 | 504919.9784 | 4038317.0213 | 296.8586 | 2 |
| 70 | 505022.2382 | 4038145.1364 | 298.9467 | 2 |
| 71 | 505170.5677 | 4038181.1192 | 300.5805 | 2 |
| 72 | 504780.4872 | 4037526.2284 | 302.9233 | 2 |
| 73 | 505264.1162 | 4037862.8067 | 298.6099 | 2 |
| 74 | 504826.6195 | 4037364.5908 | 305.8615 | 2 |
| 75 | 505348.1421 | 4037399.1621 | 303.2744 | 2 |
| 76 | 505181.8953 | 4037200.1896 | 299.3366 | 2 |
| 77 | 505061.6379 | 4037097.5084 | 299.4449 | 2 |
| 78 | 505158.9032 | 4037089.4838 | 302.2926 | 2 |
| 79 | 504912.6988 | 4037897.7812 | 298.5349 | 2 |
| 80 | 505024.9614 | 4036970.1090 | 300.5764 | 2 |
| 81 | 505424.8493 | 4037034.9706 | 303.1135 | 2 |
| 82 | 505113.2957 | 4038326.0415 | 300.2325 | 2 |
| 83 | 505216.4365 | 4037982.1552 | 296.9063 | 2 |
| 84 | 505211.5717 | 4037160.5858 | 299.6756 | 2 |
| 85 | 505351.9953 | 4037184.4129 | 299.9478 | 2 |
| 86 | 505406.8337 | 4037162.3599 | 300.0606 | 2 |

The total object points = 84

The residuals of image points

|       |       |        |        |       |       |        |        |
|-------|-------|--------|--------|-------|-------|--------|--------|
| Point | Image | Vx     | Vy     | 8     | 1     | -1.560 | -1.601 |
| 1     | 1     | 0.592  | 0.170  | 8     | 2     | -1.275 | -1.049 |
| 1     | 2     | -0.141 | -0.205 |       |       |        |        |
| Point | Image | Vx     | Vy     | Point | Image | Vx     | Vy     |
| 2     | 1     | 0.021  | 0.053  | 9     | 1     | -1.608 | -1.420 |
| 2     | 2     | -0.524 | 0.771  | 9     | 2     | -0.771 | -3.139 |
| Point | Image | Vx     | Vy     | Point | Image | Vx     | Vy     |
| 3     | 1     | 0.321  | -0.999 | 10    | 1     | 0.793  | -0.385 |
| 3     | 2     | 0.681  | -0.965 | 10    | 2     | 0.546  | -1.280 |
| Point | Image | Vx     | Vy     | Point | Image | Vx     | Vy     |
| 4     | 1     | -0.574 | -0.201 | 11    | 1     | 0.288  | -0.314 |
| 4     | 2     | 0.226  | 0.544  | 11    | 2     | 0.653  | 0.125  |
| Point | Image | Vx     | Vy     | Point | Image | Vx     | Vy     |
| 5     | 1     | -0.701 | -1.177 | 12    | 1     | -4.297 | 3.358  |
| 5     | 2     | 1.381  | -1.161 | 12    | 2     | -4.565 | 0.336  |
| Point | Image | Vx     | Vy     | Point | Image | Vx     | Vy     |
| 6     | 1     | -1.603 | 2.614  | 13    | 1     | -2.876 | -0.097 |
| 6     | 2     | -1.506 | 1.541  | 13    | 2     | -2.229 | 0.161  |
| Point | Image | Vx     | Vy     | Point | Image | Vx     | Vy     |
| 7     | 1     | 0.379  | -0.090 | 14    | 1     | -0.943 | 2.663  |
| 7     | 2     | -0.947 | -0.060 | 14    | 2     | 0.522  | 2.581  |
| Point | Image | Vx     | Vy     | Point | Image | Vx     | Vy     |
|       |       |        |        | 15    | 1     | 0.231  | -0.362 |

|       |       |        |        |
|-------|-------|--------|--------|
| 15    | 2     | -0.820 | -1.031 |
| Point | Image | Vx     | Vy     |
| 16    | 1     | -1.155 | 1.211  |
| 16    | 2     | -1.214 | -0.400 |
| Point | Image | Vx     | Vy     |
| 17    | 1     | 0.172  | -1.188 |
| 17    | 2     | 0.226  | -0.674 |
| Point | Image | Vx     | Vy     |
| 18    | 1     | 0.356  | -0.927 |
| 18    | 2     | 0.108  | -0.557 |
| Point | Image | Vx     | Vy     |
| 19    | 1     | 1.424  | 3.741  |
| 19    | 2     | -0.701 | 6.060  |
| Point | Image | Vx     | Vy     |
| 20    | 1     | -1.770 | -1.268 |
| 20    | 2     | 0.805  | -1.021 |
| Point | Image | Vx     | Vy     |
| 21    | 1     | 4.141  | -1.089 |
| 21    | 2     | 3.434  | -0.253 |
| Point | Image | Vx     | Vy     |
| 22    | 1     | 1.909  | 0.595  |
| 22    | 2     | 2.989  | 3.583  |
| Point | Image | Vx     | Vy     |
| 23    | 1     | -0.603 | -3.956 |
| 23    | 2     | 0.868  | -0.903 |
| Point | Image | Vx     | Vy     |
| 24    | 1     | -1.927 | 1.041  |
| 24    | 2     | -2.527 | -0.210 |
| Point | Image | Vx     | Vy     |
| 25    | 1     | 0.845  | -0.722 |
| 25    | 2     | 0.360  | -0.610 |
| Point | Image | Vx     | Vy     |
| 26    | 1     | -1.207 | -4.379 |
| 26    | 2     | -0.080 | -3.781 |
| Point | Image | Vx     | Vy     |
| 27    | 1     | 0.125  | 0.550  |
| 27    | 2     | 2.243  | -0.290 |
| Point | Image | Vx     | Vy     |
| 28    | 1     | 0.305  | -0.065 |
| 28    | 2     | 0.389  | -0.415 |
| Point | Image | Vx     | Vy     |
| 30    | 1     | 2.050  | 0.249  |
| 30    | 2     | 1.523  | 2.391  |
| Point | Image | Vx     | Vy     |
| 31    | 1     | 3.095  | -2.859 |

|       |       |        |        |
|-------|-------|--------|--------|
| 31    | 2     | 3.344  | 0.129  |
| Point | Image | Vx     | Vy     |
| 32    | 1     | -0.869 | 3.516  |
| 32    | 2     | -3.428 | 0.393  |
| Point | Image | Vx     | Vy     |
| 33    | 1     | -1.372 | -0.843 |
| 33    | 2     | -1.061 | 0.794  |
| Point | Image | Vx     | Vy     |
| 34    | 1     | -0.835 | -0.277 |
| 34    | 2     | -0.278 | 0.067  |
| Point | Image | Vx     | Vy     |
| 35    | 1     | 0.779  | 2.303  |
| 35    | 2     | 0.463  | -0.713 |
| Point | Image | Vx     | Vy     |
| 36    | 1     | 2.404  | -0.054 |
| 36    | 2     | 0.166  | -1.131 |
| Point | Image | Vx     | Vy     |
| 37    | 1     | 1.763  | -0.142 |
| 37    | 2     | 2.516  | 0.636  |
| Point | Image | Vx     | Vy     |
| 39    | 1     | 0.158  | -0.231 |
| 39    | 2     | -0.060 | -0.011 |
| Point | Image | Vx     | Vy     |
| 40    | 1     | 0.156  | -0.031 |
| 40    | 2     | 0.005  | 0.001  |
| Point | Image | Vx     | Vy     |
| 41    | 1     | 0.237  | -0.249 |
| 41    | 2     | -0.156 | -0.030 |
| Point | Image | Vx     | Vy     |
| 42    | 1     | 0.243  | -0.106 |
| 42    | 2     | -0.116 | -0.021 |
| Point | Image | Vx     | Vy     |
| 43    | 1     | -0.075 | 0.389  |
| 43    | 2     | 0.075  | 0.013  |
| Point | Image | Vx     | Vy     |
| 44    | 1     | -0.110 | 0.518  |
| 44    | 2     | -0.017 | -0.003 |
| Point | Image | Vx     | Vy     |
| 45    | 1     | 0.026  | 0.388  |
| 45    | 2     | -0.094 | -0.017 |
| Point | Image | Vx     | Vy     |
| 46    | 1     | -0.129 | 0.255  |
| 46    | 2     | 0.069  | 0.012  |
| Point | Image | Vx     | Vy     |
| 47    | 1     | 0.056  | 0.286  |

|       |       |        |        |
|-------|-------|--------|--------|
| 47    | 2     | -0.170 | -0.030 |
| Point | Image | Vx     | Vy     |
| 48    | 1     | -0.075 | 0.177  |
| 48    | 2     | 0.014  | 0.002  |
| Point | Image | Vx     | Vy     |
| 49    | 1     | 0.000  | -0.158 |
| 49    | 2     | 0.084  | 0.015  |
| Point | Image | Vx     | Vy     |
| 50    | 1     | 0.187  | -0.137 |
| 50    | 2     | -0.113 | -0.021 |
| Point | Image | Vx     | Vy     |
| 51    | 1     | -0.021 | -0.127 |
| 51    | 2     | 0.043  | 0.008  |
| Point | Image | Vx     | Vy     |
| 52    | 1     | 0.059  | -0.111 |
| 52    | 2     | -0.013 | -0.002 |
| Point | Image | Vx     | Vy     |
| 53    | 1     | -0.052 | -0.115 |
| 53    | 2     | 0.112  | 0.021  |
| Point | Image | Vx     | Vy     |
| 54    | 1     | -0.181 | 0.027  |
| 54    | 2     | 0.110  | 0.019  |
| Point | Image | Vx     | Vy     |
| 55    | 1     | -0.012 | -0.151 |
| 55    | 2     | 0.110  | 0.020  |
| Point | Image | Vx     | Vy     |
| 56    | 1     | -0.379 | -0.425 |
| 56    | 2     | 0.241  | 0.042  |
| Point | Image | Vx     | Vy     |
| 57    | 1     | 0.167  | 0.244  |
| 57    | 2     | -0.187 | -0.034 |
| Point | Image | Vx     | Vy     |
| 58    | 1     | 1.364  | 0.543  |
| 58    | 2     | -1.405 | -0.258 |
| Point | Image | Vx     | Vy     |
| 59    | 1     | 0.194  | 0.454  |
| 59    | 2     | -0.238 | -0.044 |
| Point | Image | Vx     | Vy     |
| 60    | 1     | 0.298  | 0.552  |
| 60    | 2     | -0.379 | -0.070 |
| Point | Image | Vx     | Vy     |
| 61    | 1     | 0.085  | 0.572  |
| 61    | 2     | -0.157 | -0.029 |
| Point | Image | Vx     | Vy     |
| 62    | 1     | 0.105  | -0.119 |

|       |       |        |        |
|-------|-------|--------|--------|
| 62    | 2     | -0.028 | -0.005 |
| Point | Image | Vx     | Vy     |
| 63    | 1     | 0.024  | -0.036 |
| 63    | 2     | 0.062  | 0.011  |
| Point | Image | Vx     | Vy     |
| 64    | 1     | -0.048 | -0.337 |
| 64    | 2     | 0.053  | 0.009  |
| Point | Image | Vx     | Vy     |
| 65    | 1     | 0.056  | 0.055  |
| 65    | 2     | 0.036  | 0.006  |
| Point | Image | Vx     | Vy     |
| 66    | 1     | 0.087  | 0.059  |
| 66    | 2     | 0.006  | 0.001  |
| Point | Image | Vx     | Vy     |
| 67    | 1     | -0.001 | 0.154  |
| 67    | 2     | 0.144  | 0.026  |
| Point | Image | Vx     | Vy     |
| 68    | 1     | 0.093  | 0.135  |
| 68    | 2     | 0.043  | 0.008  |
| Point | Image | Vx     | Vy     |
| 69    | 1     | 0.029  | 0.184  |
| 69    | 2     | 0.082  | 0.015  |
| Point | Image | Vx     | Vy     |
| 70    | 1     | 0.056  | 0.060  |
| 70    | 2     | -0.000 | -0.000 |
| Point | Image | Vx     | Vy     |
| 71    | 1     | -0.169 | 0.175  |
| 71    | 2     | 0.041  | 0.007  |
| Point | Image | Vx     | Vy     |
| 72    | 1     | -0.053 | 0.018  |
| 72    | 2     | 0.015  | 0.003  |
| Point | Image | Vx     | Vy     |
| 73    | 1     | -0.270 | -0.193 |
| 73    | 2     | 0.132  | 0.023  |
| Point | Image | Vx     | Vy     |
| 74    | 1     | -0.110 | 0.181  |
| 74    | 2     | 0.056  | 0.011  |
| Point | Image | Vx     | Vy     |
| 75    | 1     | 0.213  | -0.399 |
| 75    | 2     | -0.270 | -0.047 |
| Point | Image | Vx     | Vy     |
| 76    | 1     | 0.249  | -0.050 |
| 76    | 2     | -0.161 | -0.029 |
| Point | Image | Vx     | Vy     |
| 77    | 1     | 0.033  | 0.263  |



|       |       |        |        |
|-------|-------|--------|--------|
| 77    | 2     | 0.028  | 0.005  |
| Point | Image | Vx     | Vy     |
| 78    | 1     | -0.046 | 0.112  |
| 78    | 2     | 0.136  | 0.024  |
| Point | Image | Vx     | Vy     |
| 79    | 1     | 0.008  | -0.146 |
| 79    | 2     | 0.106  | 0.019  |
| Point | Image | Vx     | Vy     |
| 80    | 1     | -0.022 | 0.548  |
| 80    | 2     | 0.034  | 0.006  |
| Point | Image | Vx     | Vy     |
| 81    | 1     | -0.128 | -0.353 |
| 81    | 2     | 0.123  | 0.021  |
| Point | Image | Vx     | Vy     |

|       |       |        |        |
|-------|-------|--------|--------|
| 82    | 1     | -0.040 | 0.375  |
| 82    | 2     | -0.056 | -0.010 |
| Point | Image | Vx     | Vy     |
| 83    | 1     | -0.204 | -0.068 |
| 83    | 2     | 0.085  | 0.015  |
| Point | Image | Vx     | Vy     |
| 84    | 1     | -0.047 | -0.071 |
| 84    | 2     | 0.129  | 0.023  |
| Point | Image | Vx     | Vy     |
| 85    | 1     | -0.031 | -0.334 |
| 85    | 2     | 0.037  | 0.007  |
| Point | Image | Vx     | Vy     |
| 86    | 1     | -0.071 | -0.423 |
| 86    | 2     | 0.035  | 0.006  |

Total mean error of 168 image points: ax=0.000, ay=-0.000  
 Total RMSE of 168 image points: mx=1.112, my=1.152

The image residuals of the control points

| The image ID = 1 |        |        |  |
|------------------|--------|--------|--|
| Point ID         | Vx     | Vy     |  |
| 1                | 0.592  | 0.170  |  |
| 2                | 0.021  | 0.053  |  |
| 3                | 0.321  | -0.999 |  |
| 4                | -0.574 | -0.201 |  |
| 5                | -0.701 | -1.177 |  |
| 6                | -1.603 | 2.614  |  |
| 7                | 0.379  | -0.090 |  |
| 8                | -1.560 | -1.601 |  |
| 9                | -1.608 | -1.420 |  |
| 10               | 0.793  | -0.385 |  |
| 11               | 0.288  | -0.314 |  |
| 12               | -4.297 | 3.358  |  |
| 13               | -2.876 | -0.097 |  |
| 14               | -0.943 | 2.663  |  |
| 15               | 0.231  | -0.362 |  |
| 16               | -1.155 | 1.211  |  |
| 17               | 0.172  | -1.188 |  |
| 18               | 0.356  | -0.927 |  |
| 19               | 1.424  | 3.741  |  |
| 20               | -1.770 | -1.268 |  |
| 21               | 4.141  | -1.089 |  |
| 22               | 1.909  | 0.595  |  |
| 23               | -0.603 | -3.956 |  |
| 24               | -1.927 | 1.041  |  |
| 25               | 0.845  | -0.722 |  |
| 26               | -1.207 | -4.379 |  |
| 27               | 0.125  | 0.550  |  |
| 28               | 0.305  | -0.065 |  |
| 30               | 2.050  | 0.249  |  |
| 31               | 3.095  | -2.859 |  |
| 32               | -0.869 | 3.516  |  |

|    |        |        |
|----|--------|--------|
| 33 | -1.372 | -0.843 |
| 34 | -0.835 | -0.277 |
| 35 | 0.779  | 2.303  |
| 36 | 2.404  | -0.054 |
| 37 | 1.763  | -0.142 |
| 39 | 0.158  | -0.231 |
| 40 | 0.156  | -0.031 |
| 41 | 0.237  | -0.249 |
| 42 | 0.243  | -0.106 |
| 43 | -0.075 | 0.389  |
| 44 | -0.110 | 0.518  |
| 45 | 0.026  | 0.388  |
| 46 | -0.129 | 0.255  |
| 47 | 0.056  | 0.286  |
| 48 | -0.075 | 0.177  |
| 49 | 0.000  | -0.158 |
| 50 | 0.187  | -0.137 |
| 51 | -0.021 | -0.127 |
| 52 | 0.059  | -0.111 |
| 53 | -0.052 | -0.115 |
| 54 | -0.181 | 0.027  |
| 55 | -0.012 | -0.151 |
| 56 | -0.379 | -0.425 |
| 57 | 0.167  | 0.244  |
| 58 | 1.364  | 0.543  |
| 59 | 0.194  | 0.454  |
| 60 | 0.298  | 0.552  |
| 61 | 0.085  | 0.572  |
| 62 | 0.105  | -0.119 |
| 63 | 0.024  | -0.036 |
| 64 | -0.048 | -0.337 |

|    |        |        |
|----|--------|--------|
| 65 | 0.056  | 0.055  |
| 66 | 0.087  | 0.059  |
| 67 | -0.001 | 0.154  |
| 68 | 0.093  | 0.135  |
| 69 | 0.029  | 0.184  |
| 70 | 0.056  | 0.060  |
| 71 | -0.169 | 0.175  |
| 72 | -0.053 | 0.018  |
| 73 | -0.270 | -0.193 |
| 74 | -0.110 | 0.181  |
| 75 | 0.213  | -0.399 |

|    |        |        |
|----|--------|--------|
| 76 | 0.249  | -0.050 |
| 77 | 0.033  | 0.263  |
| 78 | -0.046 | 0.112  |
| 79 | 0.008  | -0.146 |
| 80 | -0.022 | 0.548  |
| 81 | -0.128 | -0.353 |
| 82 | -0.040 | 0.375  |
| 83 | -0.204 | -0.068 |
| 84 | -0.047 | -0.071 |
| 85 | -0.031 | -0.334 |
| 86 | -0.071 | -0.423 |

RMSE of 84 points: mx=1.094, my=1.199

The image ID = 2

| Point ID | Vx     | Vy     |
|----------|--------|--------|
| 1        | -0.141 | -0.205 |
| 2        | -0.524 | 0.771  |
| 3        | 0.681  | -0.965 |
| 4        | 0.226  | 0.544  |
| 5        | 1.381  | -1.161 |
| 6        | -1.506 | 1.541  |
| 7        | -0.947 | -0.060 |
| 8        | -1.275 | -1.049 |
| 9        | -0.771 | -3.139 |
| 10       | 0.546  | -1.280 |
| 11       | 0.653  | 0.125  |
| 12       | -4.565 | 0.336  |
| 13       | -2.229 | 0.161  |
| 14       | 0.522  | 2.581  |
| 15       | -0.820 | -1.031 |
| 16       | -1.214 | -0.400 |
| 17       | 0.226  | -0.674 |
| 18       | 0.108  | -0.557 |
| 19       | -0.701 | 6.060  |
| 20       | 0.805  | -1.021 |
| 21       | 3.434  | -0.253 |
| 22       | 2.989  | 3.583  |
| 23       | 0.868  | -0.903 |
| 24       | -2.527 | -0.210 |
| 25       | 0.360  | -0.610 |
| 26       | -0.080 | -3.781 |
| 27       | 2.243  | -0.290 |
| 28       | 0.389  | -0.415 |
| 30       | 1.523  | 2.391  |
| 31       | 3.344  | 0.129  |
| 32       | -3.428 | 0.393  |
| 33       | -1.061 | 0.794  |
| 34       | -0.278 | 0.067  |
| 35       | 0.463  | -0.713 |
| 36       | 0.166  | -1.131 |
| 37       | 2.516  | 0.636  |
| 39       | -0.060 | -0.011 |
| 40       | 0.005  | 0.001  |
| 41       | -0.156 | -0.030 |
| 42       | -0.116 | -0.021 |
| 43       | 0.075  | 0.013  |
| 44       | -0.017 | -0.003 |

|    |        |        |
|----|--------|--------|
| 45 | -0.094 | -0.017 |
| 46 | 0.069  | 0.012  |
| 47 | -0.170 | -0.030 |
| 48 | 0.014  | 0.002  |
| 49 | 0.084  | 0.015  |
| 50 | -0.113 | -0.021 |
| 51 | 0.043  | 0.008  |
| 52 | -0.013 | -0.002 |
| 53 | 0.112  | 0.021  |
| 54 | 0.110  | 0.019  |
| 55 | 0.110  | 0.020  |
| 56 | 0.241  | 0.042  |
| 57 | -0.187 | -0.034 |
| 58 | -1.405 | -0.258 |
| 59 | -0.238 | -0.044 |
| 60 | -0.379 | -0.070 |
| 61 | -0.157 | -0.029 |
| 62 | -0.028 | -0.005 |
| 63 | 0.062  | 0.011  |
| 64 | 0.053  | 0.009  |
| 65 | 0.036  | 0.006  |
| 66 | 0.006  | 0.001  |
| 67 | 0.144  | 0.026  |
| 68 | 0.043  | 0.008  |
| 69 | 0.082  | 0.015  |
| 70 | -0.000 | -0.000 |
| 71 | 0.041  | 0.007  |
| 72 | 0.015  | 0.003  |
| 73 | 0.132  | 0.023  |
| 74 | 0.056  | 0.011  |
| 75 | -0.270 | -0.047 |
| 76 | -0.161 | -0.029 |
| 77 | 0.028  | 0.005  |
| 78 | 0.136  | 0.024  |
| 79 | 0.106  | 0.019  |
| 80 | 0.034  | 0.006  |
| 81 | 0.123  | 0.021  |
| 82 | -0.056 | -0.010 |
| 83 | 0.085  | 0.015  |
| 84 | 0.129  | 0.023  |
| 85 | 0.037  | 0.007  |
| 86 | 0.035  | 0.006  |

RMSE of 84 points: mx=1.129, my=1.103

Total number of all control image points = 168

Total rmsex = 1.112, rmsey = 1.152

### Nahr al Abbara

The Triangulation Report With LPS

The output image x, y units: pixels

The output angle unit: degrees

The output ground X, Y, Z units: meters

The Input Image Coordinates

image ID = 1

| Point ID | x        | y        |    |          |         |
|----------|----------|----------|----|----------|---------|
| 1        | 707.176  | 725.056  | 47 | 790.078  | 963.987 |
| 2        | 727.881  | 728.089  | 48 | 576.827  | 947.912 |
| 3        | 665.938  | 803.136  | 49 | 729.979  | 320.762 |
| 4        | 584.196  | 664.962  | 50 | 846.841  | 133.778 |
| 5        | 549.959  | 635.070  | 51 | 228.275  | 653.036 |
| 6        | 441.194  | 659.948  | 52 | 421.458  | 578.096 |
| 7        | 151.172  | 568.086  | 53 | 1022.992 | 131.678 |
| 8        | 432.039  | 894.974  | 54 | 891.203  | 354.296 |
| 9        | 418.920  | 791.902  | 55 | 1709.913 | 696.754 |
| 10       | 613.056  | 1036.847 | 56 | 1238.177 | 354.996 |
| 11       | 259.109  | 941.112  | 57 | 433.974  | 32.190  |
| 12       | 120.996  | 985.730  | 58 | 462.820  | 38.579  |
| 13       | 163.179  | 798.921  | 59 | 400.647  | 90.383  |
| 14       | 262.136  | 742.986  | 60 | 562.956  | 20.015  |
| 15       | 105.184  | 506.919  | 61 | 606.591  | 45.998  |
| 16       | 298.258  | 424.665  | 62 | 594.810  | 65.468  |
| 17       | 597.093  | 393.839  | 63 | 675.494  | 49.361  |
| 18       | 349.158  | 220.006  | 64 | 1373.655 | 52.525  |
| 19       | 241.625  | 322.625  | 65 | 1440.668 | 93.971  |
| 20       | 189.142  | 42.022   | 66 | 1429.183 | 105.064 |
| 21       | 143.313  | 149.094  | 67 | 1610.657 | 94.252  |
| 22       | 425.035  | 72.937   | 68 | 1566.474 | 114.181 |
| 23       | 603.008  | 49.826   | 69 | 479.364  | 160.325 |
| 24       | 492.289  | 153.998  | 70 | 583.593  | 141.475 |
| 25       | 514.801  | 260.127  | 71 | 616.663  | 194.594 |
| 26       | 499.002  | 364.007  | 72 | 713.733  | 130.973 |
| 27       | 646.066  | 511.094  | 73 | 685.139  | 135.885 |
| 28       | 830.974  | 505.126  | 74 | 696.677  | 171.485 |
| 29       | 801.024  | 360.853  | 75 | 661.154  | 215.165 |
| 30       | 1386.211 | 45.886   | 76 | 647.802  | 236.935 |
| 31       | 1455.894 | 1138.895 | 77 | 714.421  | 236.120 |
| 32       | 1402.230 | 768.073  | 78 | 797.589  | 191.641 |
| 33       | 1479.288 | 383.928  | 79 | 1404.409 | 150.818 |
| 34       | 1792.127 | 420.903  | 80 | 1404.203 | 186.786 |
| 35       | 1656.954 | 416.785  | 81 | 1454.003 | 135.329 |
| 36       | 1592.853 | 305.927  | 82 | 1441.216 | 157.139 |
| 37       | 1610.064 | 125.070  | 83 | 1420.128 | 200.197 |
| 38       | 1648.720 | 983.954  | 84 | 1543.660 | 128.554 |
| 39       | 1143.189 | 30.874   | 85 | 1770.617 | 132.643 |
| 40       | 1171.983 | 205.950  | 86 | 1722.862 | 226.970 |
| 41       | 1078.262 | 387.245  | 87 | 501.723  | 284.797 |
| 42       | 1056.296 | 614.075  | 88 | 579.000  | 304.765 |
| 43       | 1095.759 | 730.018  | 89 | 526.222  | 312.369 |
| 44       | 1110.061 | 891.057  | 90 | 520.631  | 331.226 |
| 45       | 1198.875 | 1101.337 | 91 | 609.182  | 382.970 |
| 46       | 756.255  | 1117.000 | 92 | 662.990  | 276.613 |

|     |          |         |     |          |          |
|-----|----------|---------|-----|----------|----------|
| 93  | 754.828  | 281.967 | 153 | 787.820  | 960.852  |
| 94  | 793.671  | 343.858 | 154 | 1377.210 | 968.007  |
| 95  | 813.215  | 365.226 | 155 | 1358.402 | 981.041  |
| 96  | 812.643  | 381.411 | 156 | 1368.729 | 983.078  |
| 97  | 1381.796 | 338.497 | 157 | 267.394  | 1025.878 |
| 98  | 1467.188 | 314.648 | 158 | 278.680  | 1147.042 |
| 99  | 1440.453 | 373.981 | 159 | 683.787  | 1056.213 |
| 100 | 494.028  | 391.669 | 160 | 770.820  | 1108.168 |
| 101 | 618.598  | 405.849 | 161 | 1358.041 | 1038.070 |
| 102 | 669.449  | 411.135 | 162 | 1403.288 | 1091.368 |
| 103 | 809.094  | 401.970 | 163 | 1423.666 | 1099.750 |
| 104 | 784.923  | 460.700 | 164 | 1455.299 | 1129.124 |
| 105 | 1402.431 | 404.908 | 165 | 540.670  | 42.168   |
| 106 | 1391.252 | 481.420 | 166 | 674.244  | 101.471  |
| 107 | 1420.343 | 423.161 | 167 | 1366.434 | 617.966  |
| 108 | 1631.722 | 490.627 | 168 | 1397.338 | 723.519  |
| 109 | 1664.463 | 430.398 | 169 | 513.847  | 55.946   |
| 110 | 533.904  | 636.329 | 170 | 648.552  | 114.186  |
| 111 | 631.627  | 637.707 | 171 | 1441.663 | 103.717  |
| 112 | 783.715  | 523.314 | 172 | 779.856  | 179.485  |
| 113 | 819.349  | 530.241 | 173 | 738.376  | 326.448  |
| 114 | 1379.205 | 521.484 | 174 | 710.838  | 377.354  |
| 115 | 1378.830 | 529.354 | 175 | 694.963  | 497.914  |
| 116 | 1390.735 | 534.408 | 176 | 807.926  | 486.960  |
| 117 | 1573.768 | 557.402 | 177 | 820.548  | 487.111  |
| 118 | 1588.747 | 563.350 | 178 | 1104.724 | 441.108  |
| 119 | 1569.587 | 590.972 | 179 | 1399.574 | 454.198  |
| 120 | 566.004  | 677.854 | 180 | 1438.970 | 419.453  |
| 121 | 600.626  | 706.254 | 181 | 1386.354 | 600.436  |
| 122 | 683.639  | 640.977 | 182 | 1603.936 | 582.142  |
| 123 | 822.298  | 716.467 | 183 | 1487.477 | 651.945  |
| 124 | 1369.943 | 667.647 | 184 | 671.737  | 802.389  |
| 125 | 1391.669 | 675.015 | 185 | 778.061  | 883.801  |
| 126 | 1365.132 | 690.455 | 186 | 1387.837 | 766.821  |
| 127 | 1377.844 | 693.007 | 187 | 1381.048 | 856.609  |
| 128 | 1477.268 | 729.148 | 188 | 1357.077 | 899.018  |
| 129 | 1466.274 | 756.947 | 189 | 1351.687 | 959.703  |
| 130 | 413.552  | 802.914 | 190 | 698.442  | 1055.882 |
| 131 | 615.518  | 773.092 | 191 | 731.866  | 1073.655 |
| 132 | 611.917  | 818.982 | 192 | 647.852  | 343.547  |
| 133 | 627.996  | 819.101 | 193 | 702.519  | 787.522  |
| 134 | 590.176  | 894.856 | 194 | 826.118  | 869.585  |
| 135 | 802.566  | 778.899 | 195 | 1378.269 | 489.666  |
| 136 | 800.407  | 792.373 | 196 | 630.117  | 839.487  |
| 137 | 787.629  | 819.315 | 197 | 1369.089 | 884.114  |
| 138 | 777.317  | 821.620 | 198 | 399.147  | 111.379  |
| 139 | 775.949  | 884.483 | 199 | 603.593  | 144.821  |
| 140 | 1386.210 | 780.472 | 200 | 657.083  | 108.332  |
| 141 | 1418.177 | 783.535 | 201 | 1433.960 | 175.151  |
| 142 | 1399.274 | 813.305 | 202 | 1418.396 | 182.068  |
| 143 | 1368.238 | 820.983 | 203 | 746.503  | 413.707  |
| 144 | 1409.252 | 783.848 | 204 | 763.701  | 448.364  |
| 145 | 218.639  | 972.940 | 205 | 755.211  | 456.765  |
| 146 | 428.472  | 912.366 | 206 | 622.986  | 752.703  |
| 147 | 618.061  | 918.842 | 207 | 672.565  | 641.715  |
| 148 | 720.061  | 908.122 | 208 | 772.021  | 697.697  |
| 149 | 711.203  | 940.988 | 209 | 754.481  | 718.625  |
| 150 | 779.369  | 897.243 | 210 | 604.202  | 872.759  |
| 151 | 794.097  | 896.654 | 211 | 720.529  | 885.216  |
| 152 | 774.825  | 923.142 | 212 | 1117.073 | 871.653  |

|     |          |          |     |          |          |
|-----|----------|----------|-----|----------|----------|
| 213 | 727.347  | 1113.165 | 243 | 1452.002 | 735.486  |
| 214 | 1131.804 | 1130.615 | 244 | 267.264  | 1026.881 |
| 215 | 731.712  | 729.157  | 245 | 1406.714 | 82.399   |
| 216 | 1401.856 | 776.081  | 246 | 795.848  | 182.806  |
| 217 | 1458.864 | 745.882  | 247 | 1484.723 | 276.844  |
| 218 | 1446.297 | 119.921  | 248 | 579.871  | 707.028  |
| 219 | 745.603  | 1073.527 | 249 | 1393.289 | 687.875  |
| 220 | 1383.058 | 993.003  | 250 | 629.623  | 1002.024 |
| 221 | 1650.348 | 39.819   | 251 | 787.352  | 954.291  |
| 222 | 1398.199 | 203.339  | 252 | 1364.634 | 928.359  |
| 223 | 1460.446 | 313.476  | 253 | 202.891  | 1071.604 |
| 224 | 808.863  | 685.157  | 254 | 1447.136 | 1111.056 |
| 225 | 1391.234 | 718.337  | 255 | 1559.475 | 158.585  |
| 226 | 731.661  | 872.008  | 256 | 1073.999 | 634.381  |
| 227 | 1143.189 | 1115.917 | 257 | 775.348  | 821.331  |
| 228 | 819.073  | 1128.095 | 258 | 212.581  | 1156.719 |
| 229 | 1173.361 | 216.400  | 259 | 1364.396 | 584.473  |
| 230 | 1604.199 | 310.285  | 260 | 827.364  | 763.990  |
| 231 | 1605.387 | 119.786  | 261 | 860.440  | 17.347   |
| 232 | 550.260  | 182.648  | 262 | 1173.619 | 187.977  |
| 233 | 1413.653 | 418.757  | 263 | 1527.633 | 221.795  |
| 234 | 727.901  | 633.569  | 264 | 802.363  | 270.918  |
| 235 | 651.085  | 668.447  | 265 | 226.437  | 1059.155 |
| 236 | 770.097  | 717.963  | 266 | 725.963  | 364.302  |
| 237 | 1439.422 | 729.432  | 267 | 1382.596 | 322.853  |
| 238 | 1379.205 | 746.737  | 268 | 1069.567 | 617.426  |
| 239 | 1439.094 | 737.836  | 269 | 714.286  | 869.566  |
| 240 | 1467.086 | 1152.426 | 270 | 564.994  | 689.503  |
| 241 | 640.538  | 425.386  | 271 | 750.607  | 1098.642 |
| 242 | 1496.655 | 616.676  |     |          |          |

Affine coefficients from file (pixels) to film (millimeters)

| A0      | A1       | A2       | B0      | B1       | B2        |
|---------|----------|----------|---------|----------|-----------|
| -4.5045 | 0.000000 | 0.007000 | -6.2825 | 0.007000 | -0.000000 |

image ID = 2

| Point ID | x       | y        |    |          |          |
|----------|---------|----------|----|----------|----------|
| 1        | 907.037 | 788.952  | 24 | 520.064  | 219.083  |
| 2        | 929.085 | 790.959  | 25 | 574.963  | 326.001  |
| 3        | 891.242 | 873.969  | 26 | 591.050  | 429.979  |
| 4        | 767.913 | 735.901  | 27 | 781.107  | 579.145  |
| 5        | 723.028 | 703.990  | 28 | 964.932  | 574.037  |
| 6        | 624.054 | 729.326  | 29 | 889.841  | 427.056  |
| 7        | 306.043 | 635.035  | 30 | 1370.899 | 110.835  |
| 8        | 686.103 | 967.996  | 31 | 1781.314 | 1214.972 |
| 9        | 642.588 | 863.237  | 32 | 1613.135 | 839.246  |
| 10       | 909.342 | 1113.005 | 33 | 1572.795 | 457.100  |
| 11       | 525.854 | 1013.157 | 34 | 1893.142 | 486.043  |
| 12       | 401.706 | 1059.117 | 35 | 1757.262 | 485.818  |
| 13       | 389.185 | 868.945  | 36 | 1659.067 | 371.999  |
| 14       | 471.205 | 811.997  | 37 | 1620.910 | 191.930  |
| 15       | 242.135 | 572.090  | 38 | 1926.315 | 1058.353 |
| 16       | 400.013 | 475.162  | 39 | 1126.776 | 94.093   |
| 17       | 697.346 | 461.007  | 40 | 1211.138 | 270.963  |
| 18       | 397.033 | 284.824  | 41 | 1172.086 | 454.069  |
| 19       | 322.458 | 394.808  | 42 | 1221.046 | 683.823  |
| 20       | 184.045 | 104.930  | 43 | 1296.822 | 800.046  |
| 21       | 172.185 | 211.919  | 44 | 1362.062 | 966.208  |
| 22       | 428.024 | 136.010  | 45 | 1511.968 | 1177.565 |
| 23       | 597.167 | 113.959  | 46 | 1077.729 | 1195.028 |

|     |          |          |     |          |          |
|-----|----------|----------|-----|----------|----------|
| 47  | 1064.150 | 1038.844 | 107 | 1524.809 | 491.113  |
| 48  | 847.125  | 1022.794 | 108 | 1756.521 | 558.787  |
| 49  | 807.100  | 385.928  | 109 | 1770.497 | 497.720  |
| 50  | 865.997  | 200.053  | 110 | 708.957  | 706.026  |
| 51  | 408.953  | 722.107  | 111 | 806.646  | 708.357  |
| 52  | 579.024  | 646.910  | 112 | 921.675  | 592.006  |
| 53  | 1031.439 | 197.704  | 113 | 960.353  | 599.134  |
| 54  | 984.535  | 423.659  | 114 | 1514.338 | 590.414  |
| 55  | 1869.916 | 727.540  | 115 | 1516.568 | 598.117  |
| 56  | 1320.170 | 422.964  | 116 | 1529.932 | 603.460  |
| 57  | 424.803  | 95.907   | 117 | 1719.700 | 626.816  |
| 58  | 455.721  | 102.173  | 118 | 1736.531 | 632.723  |
| 59  | 409.457  | 154.231  | 119 | 1725.806 | 660.918  |
| 60  | 549.438  | 84.770   | 120 | 753.501  | 748.669  |
| 61  | 600.676  | 110.741  | 121 | 796.509  | 777.448  |
| 62  | 595.064  | 130.307  | 122 | 859.263  | 711.447  |
| 63  | 670.435  | 114.104  | 123 | 1020.586 | 787.697  |
| 64  | 1363.391 | 117.277  | 124 | 1550.878 | 738.434  |
| 65  | 1443.024 | 159.061  | 125 | 1574.708 | 745.020  |
| 66  | 1434.869 | 170.109  | 126 | 1553.453 | 762.206  |
| 67  | 1611.912 | 158.801  | 127 | 1566.518 | 763.922  |
| 68  | 1573.920 | 179.662  | 128 | 1676.490 | 800.644  |
| 69  | 509.188  | 225.161  | 129 | 1673.202 | 828.847  |
| 70  | 606.850  | 207.105  | 130 | 639.655  | 874.658  |
| 71  | 655.834  | 259.352  | 131 | 832.291  | 845.867  |
| 72  | 732.890  | 196.096  | 132 | 841.702  | 892.372  |
| 73  | 706.647  | 201.221  | 133 | 857.707  | 892.333  |
| 74  | 728.458  | 236.933  | 134 | 843.174  | 969.381  |
| 75  | 706.419  | 281.352  | 135 | 1020.138 | 850.392  |
| 76  | 700.368  | 303.409  | 136 | 1020.633 | 864.271  |
| 77  | 765.756  | 301.751  | 137 | 1016.958 | 891.427  |
| 78  | 834.516  | 255.501  | 138 | 1007.199 | 893.789  |
| 79  | 1424.295 | 216.343  | 139 | 1025.521 | 958.790  |
| 80  | 1435.177 | 252.560  | 140 | 1600.942 | 852.937  |
| 81  | 1468.992 | 200.643  | 141 | 1634.214 | 856.184  |
| 82  | 1462.926 | 222.551  | 142 | 1624.413 | 886.191  |
| 83  | 1455.426 | 265.901  | 143 | 1596.024 | 894.276  |
| 84  | 1556.034 | 193.417  | 144 | 1625.269 | 856.581  |
| 85  | 1782.700 | 197.371  | 145 | 496.091  | 1046.346 |
| 86  | 1764.506 | 292.520  | 146 | 686.872  | 987.114  |
| 87  | 569.275  | 351.164  | 147 | 878.638  | 993.310  |
| 88  | 652.527  | 371.557  | 148 | 977.158  | 982.691  |
| 89  | 602.370  | 378.996  | 149 | 978.379  | 1016.114 |
| 90  | 602.340  | 398.240  | 150 | 1032.913 | 971.635  |
| 91  | 706.212  | 450.349  | 151 | 1047.408 | 971.327  |
| 92  | 727.355  | 343.268  | 152 | 1036.177 | 997.872  |
| 93  | 819.358  | 347.817  | 153 | 1061.268 | 1036.112 |
| 94  | 877.708  | 409.739  | 154 | 1650.855 | 1043.714 |
| 95  | 903.365  | 430.957  | 155 | 1636.360 | 1057.067 |
| 96  | 907.582  | 447.235  | 156 | 1647.438 | 1059.224 |
| 97  | 1460.127 | 405.478  | 157 | 561.388  | 1100.460 |
| 98  | 1537.654 | 381.252  | 158 | 609.971  | 1223.846 |
| 99  | 1529.783 | 441.307  | 159 | 986.562  | 1133.577 |
| 100 | 593.980  | 457.642  | 160 | 1090.089 | 1186.586 |
| 101 | 722.592  | 473.722  | 161 | 1653.599 | 1115.247 |
| 102 | 774.812  | 478.888  | 162 | 1715.485 | 1169.528 |
| 103 | 910.450  | 468.111  | 163 | 1738.566 | 1177.852 |
| 104 | 904.909  | 528.404  | 164 | 1779.377 | 1207.706 |
| 105 | 1501.551 | 472.270  | 165 | 534.006  | 106.872  |
| 106 | 1514.169 | 549.679  | 166 | 684.600  | 166.247  |

|     |          |          |     |          |          |
|-----|----------|----------|-----|----------|----------|
| 167 | 1531.914 | 688.494  | 220 | 1664.464 | 1069.271 |
| 168 | 1595.518 | 795.123  | 221 | 1634.453 | 104.307  |
| 169 | 511.672  | 120.569  | 222 | 1434.350 | 269.902  |
| 170 | 663.393  | 179.489  | 223 | 1530.524 | 380.342  |
| 171 | 1447.032 | 168.841  | 224 | 993.457  | 749.684  |
| 172 | 813.034  | 244.615  | 225 | 1587.818 | 790.103  |
| 173 | 817.340  | 393.185  | 226 | 976.993  | 945.794  |
| 174 | 805.167  | 444.338  | 227 | 1462.798 | 1191.585 |
| 175 | 826.232  | 566.351  | 228 | 1143.554 | 1206.425 |
| 176 | 935.541  | 554.192  | 229 | 1214.321 | 279.632  |
| 177 | 948.236  | 554.161  | 230 | 1673.008 | 378.138  |
| 178 | 1215.777 | 508.075  | 231 | 1614.591 | 184.862  |
| 179 | 1513.793 | 522.099  | 232 | 586.358  | 248.180  |
| 180 | 1541.553 | 487.238  | 233 | 1516.845 | 486.520  |
| 181 | 1546.446 | 670.268  | 234 | 900.998  | 703.695  |
| 182 | 1757.309 | 651.530  | 235 | 835.746  | 739.408  |
| 183 | 1663.341 | 722.285  | 236 | 968.083  | 782.102  |
| 184 | 896.077  | 873.654  | 237 | 1639.170 | 801.395  |
| 185 | 1027.350 | 958.114  | 238 | 1583.900 | 819.086  |
| 186 | 1598.420 | 839.126  | 239 | 1640.918 | 809.943  |
| 187 | 1619.967 | 930.423  | 240 | 1798.349 | 1231.266 |
| 188 | 1609.315 | 973.435  | 241 | 749.839  | 493.007  |
| 189 | 1622.923 | 1035.385 | 242 | 1660.869 | 687.400  |
| 190 | 1001.015 | 1133.035 | 243 | 1649.479 | 809.282  |
| 191 | 1039.755 | 1151.268 | 244 | 561.580  | 1101.531 |
| 192 | 732.132  | 410.588  | 245 | 1405.815 | 147.682  |
| 193 | 922.754  | 856.180  | 246 | 830.028  | 246.551  |
| 194 | 1070.999 | 943.076  | 247 | 1543.585 | 343.002  |
| 195 | 1503.630 | 557.755  | 248 | 775.870  | 778.063  |
| 196 | 866.416  | 912.930  | 249 | 1574.068 | 762.791  |
| 197 | 1616.417 | 958.303  | 250 | 890.666  | 1070.243 |
| 198 | 414.071  | 175.883  | 251 | 1058.569 | 1029.177 |
| 199 | 627.858  | 210.446  | 252 | 1625.875 | 1003.324 |
| 200 | 670.470  | 173.718  | 253 | 510.223  | 1146.227 |
| 201 | 1461.404 | 240.608  | 254 | 1765.760 | 1189.617 |
| 202 | 1448.042 | 247.755  | 255 | 1580.628 | 223.618  |
| 203 | 851.825  | 481.184  | 256 | 1244.458 | 703.758  |
| 204 | 879.678  | 515.845  | 257 | 1007.299 | 892.691  |
| 205 | 873.982  | 524.581  | 258 | 546.113  | 1233.604 |
| 206 | 833.470  | 824.554  | 259 | 1519.130 | 653.927  |
| 207 | 848.295  | 712.533  | 260 | 1040.154 | 818.079  |
| 208 | 965.142  | 765.843  | 261 | 839.825  | 71.746   |
| 209 | 952.544  | 781.084  | 262 | 1208.173 | 260.986  |
| 210 | 850.475  | 946.576  | 263 | 1573.343 | 272.734  |
| 211 | 970.664  | 959.562  | 264 | 864.409  | 336.781  |
| 212 | 1360.512 | 944.304  | 265 | 554.453  | 1141.120 |
| 213 | 1047.777 | 1191.053 | 266 | 816.795  | 431.386  |
| 214 | 1455.989 | 1207.478 | 267 | 1455.999 | 389.520  |
| 215 | 932.458  | 791.811  | 268 | 1234.402 | 687.197  |
| 216 | 1615.556 | 848.674  | 269 | 959.286  | 943.742  |
| 217 | 1662.796 | 817.816  | 270 | 766.930  | 774.976  |
| 218 | 1456.495 | 185.068  | 271 | 1066.405 | 1169.438 |
| 219 | 1053.828 | 1151.279 |     |          |          |

Affine coefficients from file (pixels) to film (millimeters)

| A0      | A1       | A2       | B0      | B1       | B2       |
|---------|----------|----------|---------|----------|----------|
| -4.3715 | 0.000000 | 0.007000 | -7.0525 | 0.007000 | 0.000000 |

# THE OUTPUT OF SELF-CALIBRATING BUNDLE BLOCK ADJUSTMENT

the no. of iteration =1    the standard error = 2.6039  
the maximal correction of the object points = 0.00000

the no. of iteration =2    the standard error = 2.6039  
the maximal correction of the object points = 0.00000

The exterior orientation parameters

| image ID | Xs          | Ys           | Zs          | OMEGA    | PHI      | KAPPA    |
|----------|-------------|--------------|-------------|----------|----------|----------|
| 1        | 610890.8760 | 4002770.1317 | 153248.5928 | 12.8839  | 33.8929  | -82.2626 |
| 2        | 408869.8469 | 3985914.9215 | 154321.9328 | 378.6637 | -30.6871 | 277.5169 |

The interior orientation parameters of photos

| image ID | f(mm)    | xo(mm) | yo(mm) |
|----------|----------|--------|--------|
| 1        | 609.6020 | 0.0000 | 0.0000 |
| 2        | 609.6020 | 0.0000 | 0.0000 |

The residuals of the control points

| Point ID | rX | rY | rZ |
|----------|----|----|----|
|----------|----|----|----|

All residuals of fixed GCP are zero.

The difference of intersected and measured control points

| Point ID | rX | rY | rZ |
|----------|----|----|----|
|----------|----|----|----|

|    |          |          |          |    |          |          |          |
|----|----------|----------|----------|----|----------|----------|----------|
| 1  | 22.5149  | 6.6374   | -20.5718 | 36 | -1.8180  | 7.2045   | 5.1552   |
| 2  | 26.2892  | 7.5607   | -19.4998 | 37 | -5.2284  | -1.4087  | 2.2909   |
| 3  | 9.1905   | -2.0625  | -7.1800  | 38 | -16.8145 | 3.2596   | 21.0916  |
| 4  | 1.4148   | -5.2946  | 3.6203   | 39 | 4.4699   | -1.5768  | -7.3173  |
| 5  | 2.5057   | -1.6284  | 2.4747   | 40 | 9.6151   | -16.2112 | -4.7127  |
| 6  | 5.7139   | -3.0673  | 4.7684   | 41 | 6.1459   | 1.3432   | -6.0566  |
| 7  | -2.9593  | -2.7035  | 9.7339   | 42 | -10.7442 | -15.7645 | -2.5328  |
| 8  | 4.2497   | -2.1002  | 0.8783   | 43 | -1.7274  | -0.7936  | -1.7367  |
| 9  | 3.7374   | 13.0874  | 5.9997   | 44 | -5.5540  | 1.2154   | 2.3519   |
| 10 | 9.1323   | -3.0738  | -3.6078  | 45 | -6.9747  | 1.8668   | -0.6274  |
| 11 | 6.0804   | -4.2531  | 2.0669   | 46 | 4.4795   | 17.9685  | 4.8129   |
| 12 | 2.8359   | -7.8765  | 3.6183   | 47 | 3.3700   | -3.1015  | 1.5631   |
| 13 | 3.5246   | -3.7236  | 10.1006  | 48 | 1.6473   | -4.6656  | 4.2500   |
| 14 | 5.0043   | -5.7020  | 9.4188   | 49 | 7.8558   | 2.1517   | 4.4303   |
| 15 | -4.3186  | -3.8829  | 13.6543  | 50 | 2.6368   | -6.3406  | -1.0516  |
| 16 | -1.6527  | -9.5825  | -5.7101  | 51 | 0.2622   | -1.8631  | 9.0968   |
| 17 | 1.3935   | -2.4625  | 3.0240   | 52 | 3.1452   | 5.6152   | 3.0357   |
| 18 | 6.2655   | 5.8017   | 4.9092   | 53 | 23.9634  | 0.8857   | -22.2938 |
| 19 | 0.3841   | 5.8049   | 9.5393   | 54 | -13.9490 | -9.0609  | 11.5800  |
| 20 | 0.3663   | 5.7682   | 17.1765  | 55 | 22.8921  | 9.1151   | -28.3897 |
| 21 | -21.6776 | 3.5304   | 19.3344  | 56 | -6.3976  | -10.9834 | -8.5935  |
| 22 | 0.8448   | 8.7363   | 5.5600   | 57 | 2.5572   | -4.1417  | 2.2594   |
| 23 | -21.7592 | 2.0951   | 7.0249   | 58 | 1.8915   | -3.6911  | 1.4118   |
| 24 | 1.8724   | 1.2000   | 2.4009   | 59 | 3.3564   | -4.3449  | 3.4470   |
| 25 | 3.8660   | 2.6967   | 4.2806   | 60 | -0.1659  | -2.3315  | -1.2886  |
| 26 | -1.4372  | -2.2962  | 5.2940   | 61 | -0.9159  | -1.7101  | -2.1969  |
| 27 | 19.2341  | -13.9840 | 2.1363   | 62 | -0.7019  | -1.8251  | -1.9000  |
| 28 | 2.4905   | -5.3672  | 1.5390   | 63 | -1.9646  | -0.8683  | -3.5000  |
| 29 | 6.0681   | 0.2033   | -1.9138  | 64 | -2.1000  | 4.2863   | -1.5846  |
| 30 | 19.8995  | 3.1890   | -7.3397  | 65 | -0.9326  | 3.9570   | 0.1629   |
| 31 | -14.3761 | 9.1905   | 13.7724  | 66 | -1.0665  | 3.8101   | -0.1103  |
| 32 | -5.3051  | 1.4989   | 6.5648   | 67 | 2.3289   | 4.0242   | 5.4833   |
| 33 | 10.2307  | -1.9827  | 6.9246   | 68 | 1.4779   | 3.7697   | 3.9782   |
| 34 | -16.9006 | 0.7828   | 14.2445  | 69 | 1.5346   | -2.9474  | 1.1832   |
| 35 | -22.5507 | -2.7000  | 7.9457   | 70 | -0.4657  | -1.7840  | -1.4962  |



|     |         |         |         |     |         |         |         |
|-----|---------|---------|---------|-----|---------|---------|---------|
| 71  | -0.9861 | -1.3021 | -2.0860 | 131 | -1.1644 | 1.1706  | -1.3574 |
| 72  | -2.3705 | -0.4214 | -3.9327 | 132 | -1.1727 | 1.4552  | -1.2512 |
| 73  | -2.0035 | -0.7083 | -3.4719 | 133 | -1.3741 | 1.4476  | -1.5752 |
| 74  | -2.1203 | -0.5620 | -3.5880 | 134 | -0.9998 | 1.9959  | -0.7468 |
| 75  | -1.6210 | -0.8312 | -2.9101 | 135 | -2.8906 | 1.0431  | -4.1702 |
| 76  | -1.4213 | -0.9107 | -2.6257 | 136 | -2.8819 | 1.0837  | -4.1368 |
| 77  | -2.2779 | -0.3451 | -3.7361 | 137 | -2.8219 | 1.2074  | -3.9916 |
| 78  | -3.1572 | 0.3081  | -4.8431 | 138 | -2.7595 | 1.2398  | -3.8781 |
| 79  | -1.2473 | 3.2634  | -0.6283 | 139 | -2.7986 | 1.4889  | -3.8097 |
| 80  | -1.1023 | 2.8746  | -0.5542 | 140 | 0.4489  | -2.0742 | -0.1429 |
| 81  | -0.5303 | 3.4803  | 0.6184  | 141 | 1.0130  | -2.3790 | 0.6413  |
| 82  | -0.6467 | 3.2192  | 0.3245  | 142 | 0.7409  | -2.3980 | 0.1948  |
| 83  | -0.8017 | 2.7322  | -0.1257 | 143 | 0.2318  | -2.1572 | -0.5191 |
| 84  | 1.0824  | 3.5780  | 3.2747  | 144 | 0.8539  | -2.3006 | 0.4186  |
| 85  | 6.6066  | 3.1068  | 12.0768 | 145 | 6.4790  | 2.8523  | 11.2359 |
| 86  | 5.8025  | 1.7624  | 10.1910 | 146 | 1.6464  | 2.2594  | 3.5175  |
| 87  | 1.0524  | -2.1088 | 0.7810  | 147 | -1.3951 | 2.1196  | -1.3251 |
| 88  | -0.3515 | -1.3109 | -1.0960 | 148 | -2.4211 | 1.7828  | -3.0850 |
| 89  | 0.5747  | -1.7447 | 0.1834  | 149 | -2.3866 | 1.9892  | -2.9377 |
| 90  | 0.6734  | -1.7029 | 0.3541  | 150 | -2.8294 | 1.5308  | -3.8419 |
| 91  | -0.8311 | -0.7829 | -1.6314 | 151 | -2.9129 | 1.4725  | -3.9935 |
| 92  | -1.6116 | -0.6960 | -2.8324 | 152 | -2.8244 | 1.6587  | -3.7777 |
| 93  | -2.6675 | -0.0029 | -4.2101 | 153 | -2.9355 | 1.7719  | -3.9019 |
| 94  | -2.9511 | 0.2634  | -4.5476 | 154 | 0.6248  | -3.0326 | -0.2156 |
| 95  | -3.0778 | 0.3695  | -4.7056 | 155 | 0.3240  | -2.8767 | -0.6280 |
| 96  | -3.0597 | 0.3719  | -4.6774 | 156 | 0.4996  | -3.0056 | -0.3961 |
| 97  | -0.8603 | 1.3758  | -0.7897 | 157 | 4.9797  | 3.6123  | 9.2344  |
| 98  | 0.4496  | 1.4420  | 1.3513  | 158 | 4.2521  | 5.2650  | 8.8139  |
| 99  | 0.2073  | 0.8982  | 0.7276  | 159 | -2.3227 | 2.8149  | -2.4523 |
| 100 | 1.1500  | -1.6055 | 1.1513  | 160 | -3.0356 | 2.6110  | -3.6417 |
| 101 | -0.9715 | -0.6343 | -1.7932 | 161 | 0.3857  | -3.1220 | -0.6023 |
| 102 | -1.6562 | -0.3093 | -2.7400 | 162 | 1.2464  | -3.9444 | 0.4725  |
| 103 | -3.0174 | 0.3655  | -4.6156 | 163 | 1.6454  | -4.2649 | 0.9818  |
| 104 | -2.8002 | 0.3270  | -4.2947 | 164 | 2.3158  | -4.8675 | 1.8317  |
| 105 | -0.3135 | 0.7170  | -0.1875 | 165 | 0.2680  | -2.5813 | -0.6959 |
| 106 | -0.2426 | 0.0877  | -0.3441 | 166 | -1.8952 | -0.8485 | -3.3602 |
| 107 | 0.0393  | 0.4924  | 0.2823  | 167 | -0.2449 | -0.8435 | -0.7448 |
| 108 | 4.6735  | -1.3521 | 7.0111  | 168 | 0.5129  | -1.7910 | 0.0763  |
| 109 | 5.2479  | -0.8207 | 8.1790  | 169 | 0.8073  | -2.9043 | 0.0215  |
| 110 | 0.2091  | 0.1466  | 0.3734  | 170 | -1.5148 | -1.1150 | -2.8787 |
| 111 | -1.2435 | 0.4383  | -1.7885 | 171 | -0.8738 | 3.8445  | 0.2109  |
| 112 | -2.7659 | 0.4200  | -4.2085 | 172 | -3.0135 | 0.1780  | -4.6941 |
| 113 | -3.0008 | 0.5087  | -4.5471 | 173 | -2.4668 | -0.0706 | -3.9248 |
| 114 | -0.3116 | -0.1867 | -0.5739 | 174 | -2.1504 | -0.1542 | -3.4565 |
| 115 | -0.2942 | -0.2473 | -0.5716 | 175 | -1.9511 | 0.0739  | -3.0537 |
| 116 | -0.0920 | -0.3444 | -0.2875 | 176 | -2.9514 | 0.4320  | -4.4953 |
| 117 | 3.5465  | -1.6916 | 5.0296  | 177 | -3.0318 | 0.4664  | -4.6095 |
| 118 | 3.9158  | -1.8698 | 5.5540  | 178 | -3.2916 | 0.9213  | -4.8605 |
| 119 | 3.5683  | -2.0144 | 4.9273  | 179 | -0.1978 | 0.2887  | -0.1849 |
| 120 | -0.3538 | 0.5103  | -0.3598 | 180 | 0.3386  | 0.4631  | 0.7535  |
| 121 | -0.8887 | 0.7537  | -1.1036 | 181 | 0.0238  | -0.8334 | -0.3091 |
| 122 | -1.8621 | 0.5584  | -2.7196 | 182 | 4.3444  | -2.1969 | 6.1131  |
| 123 | -2.9820 | 0.8412  | -4.3914 | 183 | 1.9989  | -1.9487 | 2.4084  |
| 124 | -0.0671 | -1.2090 | -0.6154 | 184 | -1.8502 | 1.3233  | -2.4077 |
| 125 | 0.3025  | -1.4093 | -0.1113 | 185 | -2.8106 | 1.4776  | -3.8335 |
| 126 | -0.0890 | -1.3288 | -0.6950 | 186 | 0.4473  | -2.0024 | -0.1144 |
| 127 | 0.1190  | -1.4353 | -0.4128 | 187 | 0.5110  | -2.4835 | -0.1994 |
| 128 | 2.0067  | -2.5099 | 2.1841  | 188 | 0.1859  | -2.4705 | -0.7101 |
| 129 | 1.8574  | -2.6300 | 1.8931  | 189 | 0.1862  | -2.7056 | -0.7848 |
| 130 | 2.1997  | 1.1732  | 3.9040  | 190 | -2.4483 | 2.7354  | -2.6908 |

|     |         |         |         |     |         |         |         |
|-----|---------|---------|---------|-----|---------|---------|---------|
| 191 | -2.7356 | 2.6560  | -3.1682 | 232 | 0.1373  | -2.0272 | -0.6402 |
| 192 | -1.3867 | -0.6410 | -2.4513 | 233 | -0.0869 | 0.5583  | 0.1073  |
| 193 | -2.1412 | 1.2296  | -2.9423 | 234 | -2.3001 | 0.5951  | -3.3996 |
| 194 | -3.0463 | 1.2575  | -4.3156 | 235 | -1.5074 | 0.6270  | -2.1269 |
| 195 | -0.4209 | 0.0728  | -0.6369 | 236 | -2.6557 | 0.9022  | -3.9195 |
| 196 | -1.4266 | 1.5737  | -1.6057 | 237 | 1.2760  | -2.1827 | 1.1478  |
| 197 | 0.3585  | -2.5165 | -0.4544 | 238 | 0.2599  | -1.8032 | -0.3291 |
| 198 | 3.3890  | -4.2442 | 3.5306  | 239 | 1.2894  | -2.2433 | 1.1445  |
| 199 | -0.7979 | -1.5503 | -1.9248 | 240 | 2.5913  | -5.1703 | 2.1646  |
| 200 | -1.6420 | -1.0284 | -3.0485 | 241 | -1.2808 | -0.4279 | -2.1976 |
| 201 | -0.6881 | 3.0143  | 0.1735  | 242 | 2.0757  | -1.7050 | 2.6404  |
| 202 | -0.9048 | 2.9334  | -0.2125 | 243 | 1.5164  | -2.3483 | 1.4849  |
| 203 | -2.4966 | 0.1004  | -3.9039 | 244 | 4.9794  | 3.6147  | 9.2492  |
| 204 | -2.6348 | 0.2308  | -4.0708 | 245 | -1.5025 | 4.0413  | -0.7371 |
| 205 | -2.5570 | 0.2114  | -3.9562 | 246 | -3.1523 | 0.3068  | -4.8469 |
| 206 | -1.2353 | 1.0513  | -1.5273 | 247 | 0.6173  | 1.8265  | 1.7822  |
| 207 | -1.7399 | 0.5403  | -2.5309 | 248 | -0.5944 | 0.7182  | -0.6485 |
| 208 | -2.6709 | 0.8321  | -3.9241 | 249 | 0.3386  | -1.5274 | -0.0632 |
| 209 | -2.5389 | 0.9168  | -3.7457 | 250 | -1.5515 | 2.5319  | -1.5663 |
| 210 | -1.1482 | 1.8195  | -1.0626 | 251 | -2.9286 | 1.7371  | -3.9009 |
| 211 | -2.4002 | 1.6607  | -3.1019 | 252 | 0.3521  | -2.6995 | -0.5260 |
| 212 | -2.6312 | -0.3077 | -4.3462 | 253 | 6.5538  | 4.2489  | 11.9485 |
| 213 | -2.7686 | 2.9312  | -3.1001 | 254 | 2.1222  | -4.6608 | 1.6067  |
| 214 | -2.4358 | -0.6297 | -4.0996 | 255 | 1.5461  | 3.1785  | 3.8543  |
| 215 | -2.3569 | 0.9629  | -3.4426 | 256 | -3.1144 | 0.3474  | -4.8346 |
| 216 | 0.7071  | -2.1851 | 0.2316  | 257 | -2.7506 | 1.2492  | -3.8644 |
| 217 | 1.6850  | -2.4786 | 1.6820  | 258 | 5.9372  | 5.5117  | 11.5582 |
| 218 | -0.7288 | 3.6619  | 0.3713  | 259 | -0.0012 | -0.0012 | 0.0009  |
| 219 | -2.8305 | 2.5697  | -3.3463 | 260 | 0.0027  | 0.0067  | -0.0081 |
| 220 | 0.7612  | -3.2284 | -0.0620 | 261 | -0.0044 | -0.0030 | 0.0004  |
| 221 | 2.9464  | 4.8390  | 6.8133  | 262 | -0.0039 | -0.0033 | 0.0012  |
| 222 | -1.1244 | 2.7046  | -0.6740 | 263 | -0.0023 | -0.0037 | 0.0025  |
| 223 | 0.3240  | 1.4746  | 1.1579  | 264 | -0.0025 | -0.0009 | 0.0002  |
| 224 | -2.9000 | 0.7801  | -4.3409 | 265 | 0.0049  | 0.0074  | -0.0001 |
| 225 | 0.3978  | -1.7096 | -0.0714 | 266 | -0.0017 | 0.0001  | -0.0002 |
| 226 | -2.4750 | 1.5610  | -3.2678 | 267 | -0.0023 | -0.0032 | 0.0015  |
| 227 | -2.3315 | -0.7517 | -4.0184 | 268 | 0.0005  | -0.0006 | -0.0000 |
| 228 | -3.2704 | 2.3474  | -4.1238 | 269 | 0.0029  | 0.0021  | -0.0014 |
| 229 | -3.4820 | 2.2345  | -4.5850 | 270 | -0.0000 | 0.0000  | 0.0000  |
| 230 | 3.2443  | 1.0653  | 5.7050  | 271 | -0.0000 | -0.0000 | -0.0000 |
| 231 | 2.3437  | 3.6669  | 5.3484  |     |         |         |         |

aX      aY      aZ  
-0.0001 -0.0000 -0.0001  
mX      mY      mZ  
5.3141   3.5408   5.3759  
CE90      LE90  
9.5189    8.8516

The image residuals of intersected GCP

|       |       |        |        |
|-------|-------|--------|--------|
| Point | Image | Vx     | Vy     |
| 1     | 1     | 0.159  | -3.893 |
| 1     | 2     | -0.149 | 3.883  |

|       |       |        |        |
|-------|-------|--------|--------|
| Point | Image | Vx     | Vy     |
| 2     | 1     | 0.180  | -4.408 |
| 2     | 2     | -0.169 | 4.398  |

|       |       |    |    |
|-------|-------|----|----|
| Point | Image | Vx | Vy |
|-------|-------|----|----|

|   |   |        |        |
|---|---|--------|--------|
| 3 | 1 | 0.044  | -1.069 |
| 3 | 2 | -0.040 | 1.066  |

|       |       |        |        |
|-------|-------|--------|--------|
| Point | Image | Vx     | Vy     |
| 4     | 1     | 0.004  | -0.103 |
| 4     | 2     | -0.004 | 0.103  |

|       |       |       |        |
|-------|-------|-------|--------|
| Point | Image | Vx    | Vy     |
| 5     | 1     | 0.035 | -0.865 |

|       |       |        |        |
|-------|-------|--------|--------|
| 5     | 2     | -0.034 | 0.861  |
| Point | Image | Vx     | Vy     |
| 6     | 1     | 0.040  | -0.985 |
| 6     | 2     | -0.038 | 0.979  |
| Point | Image | Vx     | Vy     |
| 7     | 1     | 0.058  | -1.463 |
| 7     | 2     | -0.057 | 1.447  |
| Point | Image | Vx     | Vy     |
| 8     | 1     | 0.052  | -1.228 |
| 8     | 2     | -0.045 | 1.221  |
| Point | Image | Vx     | Vy     |
| 9     | 1     | 0.051  | -1.229 |
| 9     | 2     | -0.046 | 1.222  |
| Point | Image | Vx     | Vy     |
| 10    | 1     | 0.007  | -0.156 |
| 10    | 2     | -0.006 | 0.156  |
| Point | Image | Vx     | Vy     |
| 11    | 1     | 0.111  | -2.605 |
| 11    | 2     | -0.095 | 2.584  |
| Point | Image | Vx     | Vy     |
| 12    | 1     | 0.122  | -2.846 |
| 12    | 2     | -0.103 | 2.818  |
| Point | Image | Vx     | Vy     |
| 13    | 1     | 0.103  | -2.474 |
| 13    | 2     | -0.093 | 2.450  |
| Point | Image | Vx     | Vy     |
| 14    | 1     | 0.091  | -2.214 |
| 14    | 2     | -0.084 | 2.195  |
| Point | Image | Vx     | Vy     |
| 15    | 1     | 0.066  | -1.663 |
| 15    | 2     | -0.066 | 1.644  |
| Point | Image | Vx     | Vy     |
| 16    | 1     | 0.306  | -7.914 |
| 16    | 2     | -0.318 | 7.843  |
| Point | Image | Vx     | Vy     |
| 17    | 1     | -0.011 | 0.285  |
| 17    | 2     | 0.012  | -0.284 |
| Point | Image | Vx     | Vy     |
| 18    | 1     | -0.045 | 1.207  |
| 18    | 2     | 0.050  | -1.196 |
| Point | Image | Vx     | Vy     |
| 19    | 1     | -0.149 | 3.894  |
| 19    | 2     | 0.159  | -3.854 |
| Point | Image | Vx     | Vy     |
| 20    | 1     | -0.100 | 2.769  |

|       |       |        |        |
|-------|-------|--------|--------|
| 20    | 2     | 0.119  | -2.736 |
| Point | Image | Vx     | Vy     |
| 21    | 1     | -0.055 | 1.486  |
| 21    | 2     | 0.063  | -1.468 |
| Point | Image | Vx     | Vy     |
| 22    | 1     | -0.063 | 1.726  |
| 22    | 2     | 0.074  | -1.712 |
| Point | Image | Vx     | Vy     |
| 23    | 1     | -0.069 | 1.917  |
| 23    | 2     | 0.083  | -1.906 |
| Point | Image | Vx     | Vy     |
| 24    | 1     | -0.062 | 1.679  |
| 24    | 2     | 0.071  | -1.667 |
| Point | Image | Vx     | Vy     |
| 25    | 1     | -0.037 | 0.973  |
| 25    | 2     | 0.040  | -0.967 |
| Point | Image | Vx     | Vy     |
| 26    | 1     | -0.002 | 0.052  |
| 26    | 2     | 0.002  | -0.052 |
| Point | Image | Vx     | Vy     |
| 27    | 1     | 0.010  | -0.262 |
| 27    | 2     | -0.010 | 0.261  |
| Point | Image | Vx     | Vy     |
| 28    | 1     | -0.005 | 0.137  |
| 28    | 2     | 0.005  | -0.137 |
| Point | Image | Vx     | Vy     |
| 29    | 1     | 0.006  | -0.160 |
| 29    | 2     | -0.007 | 0.160  |
| Point | Image | Vx     | Vy     |
| 30    | 1     | 0.016  | -0.436 |
| 30    | 2     | -0.019 | 0.439  |
| Point | Image | Vx     | Vy     |
| 31    | 1     | -0.113 | 2.576  |
| 31    | 2     | 0.093  | -2.602 |
| Point | Image | Vx     | Vy     |
| 32    | 1     | -0.018 | 0.435  |
| 32    | 2     | 0.017  | -0.439 |
| Point | Image | Vx     | Vy     |
| 33    | 1     | -0.085 | 2.219  |
| 33    | 2     | 0.092  | -2.236 |
| Point | Image | Vx     | Vy     |
| 34    | 1     | 0.086  | -2.253 |
| 34    | 2     | -0.094 | 2.282  |
| Point | Image | Vx     | Vy     |
| 35    | 1     | 0.004  | -0.114 |

|       |       |        |        |
|-------|-------|--------|--------|
| 35    | 2     | -0.005 | 0.115  |
| Point | Image | Vx     | Vy     |
| 36    | 1     | 0.049  | -1.314 |
| 36    | 2     | -0.055 | 1.326  |
| Point | Image | Vx     | Vy     |
| 37    | 1     | 0.022  | -0.615 |
| 37    | 2     | -0.027 | 0.620  |
| Point | Image | Vx     | Vy     |
| 38    | 1     | -0.100 | 2.348  |
| 38    | 2     | 0.088  | -2.378 |
| Point | Image | Vx     | Vy     |
| 39    | 1     | 0.012  | -0.332 |
| 39    | 2     | -0.015 | 0.332  |
| Point | Image | Vx     | Vy     |
| 40    | 1     | 0.019  | -0.523 |
| 40    | 2     | -0.022 | 0.525  |
| Point | Image | Vx     | Vy     |
| 41    | 1     | 0.013  | -0.342 |
| 41    | 2     | -0.014 | 0.342  |
| Point | Image | Vx     | Vy     |
| 42    | 1     | 0.001  | -0.033 |
| 42    | 2     | -0.001 | 0.033  |
| Point | Image | Vx     | Vy     |
| 43    | 1     | 0.016  | -0.399 |
| 43    | 2     | -0.015 | 0.401  |
| Point | Image | Vx     | Vy     |
| 44    | 1     | -0.064 | 1.528  |
| 44    | 2     | 0.057  | -1.535 |
| Point | Image | Vx     | Vy     |
| 45    | 1     | -0.077 | 1.761  |
| 45    | 2     | 0.064  | -1.772 |
| Point | Image | Vx     | Vy     |
| 46    | 1     | -0.036 | 0.822  |
| 46    | 2     | 0.029  | -0.822 |
| Point | Image | Vx     | Vy     |
| 47    | 1     | -0.010 | 0.223  |
| 47    | 2     | 0.008  | -0.223 |
| Point | Image | Vx     | Vy     |
| 48    | 1     | 0.013  | -0.310 |
| 48    | 2     | -0.011 | 0.309  |
| Point | Image | Vx     | Vy     |
| 49    | 1     | 0.010  | -0.275 |
| 49    | 2     | -0.011 | 0.274  |
| Point | Image | Vx     | Vy     |
| 50    | 1     | -0.054 | 1.468  |

|       |       |        |         |
|-------|-------|--------|---------|
| 50    | 2     | 0.063  | -1.464  |
| Point | Image | Vx     | Vy      |
| 51    | 1     | 0.052  | -1.280  |
| 51    | 2     | -0.049 | 1.268   |
| Point | Image | Vx     | Vy      |
| 52    | 1     | 0.021  | -0.518  |
| 52    | 2     | -0.020 | 0.515   |
| Point | Image | Vx     | Vy      |
| 53    | 1     | -0.037 | 1.020   |
| 53    | 2     | 0.044  | -1.020  |
| Point | Image | Vx     | Vy      |
| 54    | 1     | -0.046 | 1.196   |
| 54    | 2     | 0.049  | -1.195  |
| Point | Image | Vx     | Vy      |
| 55    | 1     | 0.754  | -18.851 |
| 55    | 2     | -0.740 | 19.075  |
| Point | Image | Vx     | Vy      |
| 56    | 1     | -0.007 | 0.174   |
| 56    | 2     | 0.007  | -0.175  |
| Point | Image | Vx     | Vy      |
| 57    | 1     | -0.088 | 2.453   |
| 57    | 2     | 0.106  | -2.432  |
| Point | Image | Vx     | Vy      |
| 58    | 1     | -0.080 | 2.216   |
| 58    | 2     | 0.096  | -2.198  |
| Point | Image | Vx     | Vy      |
| 59    | 1     | -0.073 | 1.992   |
| 59    | 2     | 0.085  | -1.975  |
| Point | Image | Vx     | Vy      |
| 60    | 1     | -0.095 | 2.635   |
| 60    | 2     | 0.114  | -2.618  |
| Point | Image | Vx     | Vy      |
| 61    | 1     | -0.080 | 2.222   |
| 61    | 2     | 0.096  | -2.209  |
| Point | Image | Vx     | Vy      |
| 62    | 1     | -0.077 | 2.120   |
| 62    | 2     | 0.091  | -2.108  |
| Point | Image | Vx     | Vy      |
| 63    | 1     | -0.070 | 1.946   |
| 63    | 2     | 0.084  | -1.937  |
| Point | Image | Vx     | Vy      |
| 64    | 1     | 0.021  | -0.578  |
| 64    | 2     | -0.025 | 0.581   |
| Point | Image | Vx     | Vy      |
| 65    | 1     | 0.030  | -0.819  |

|       |       |        |        |
|-------|-------|--------|--------|
| 65    | 2     | -0.036 | 0.824  |
| Point | Image | Vx     | Vy     |
| 66    | 1     | 0.030  | -0.837 |
| 66    | 2     | -0.036 | 0.842  |
| Point | Image | Vx     | Vy     |
| 67    | 1     | 0.061  | -1.699 |
| 67    | 2     | -0.074 | 1.714  |
| Point | Image | Vx     | Vy     |
| 68    | 1     | 0.041  | -1.120 |
| 68    | 2     | -0.049 | 1.129  |
| Point | Image | Vx     | Vy     |
| 69    | 1     | -0.056 | 1.523  |
| 69    | 2     | 0.064  | -1.512 |
| Point | Image | Vx     | Vy     |
| 70    | 1     | -0.067 | 1.830  |
| 70    | 2     | 0.078  | -1.819 |
| Point | Image | Vx     | Vy     |
| 71    | 1     | -0.030 | 0.819  |
| 71    | 2     | 0.035  | -0.815 |
| Point | Image | Vx     | Vy     |
| 72    | 1     | -0.048 | 1.305  |
| 72    | 2     | 0.056  | -1.299 |
| Point | Image | Vx     | Vy     |
| 73    | 1     | -0.053 | 1.437  |
| 73    | 2     | 0.061  | -1.430 |
| Point | Image | Vx     | Vy     |
| 74    | 1     | -0.043 | 1.164  |
| 74    | 2     | 0.049  | -1.160 |
| Point | Image | Vx     | Vy     |
| 75    | 1     | -0.046 | 1.244  |
| 75    | 2     | 0.052  | -1.238 |
| Point | Image | Vx     | Vy     |
| 76    | 1     | -0.046 | 1.215  |
| 76    | 2     | 0.051  | -1.210 |
| Point | Image | Vx     | Vy     |
| 77    | 1     | -0.025 | 0.671  |
| 77    | 2     | 0.028  | -0.669 |
| Point | Image | Vx     | Vy     |
| 78    | 1     | 0.002  | -0.043 |
| 78    | 2     | -0.002 | 0.043  |
| Point | Image | Vx     | Vy     |
| 79    | 1     | 0.025  | -0.678 |
| 79    | 2     | -0.029 | 0.682  |
| Point | Image | Vx     | Vy     |
| 80    | 1     | 0.025  | -0.681 |

|       |       |        |        |
|-------|-------|--------|--------|
| 80    | 2     | -0.029 | 0.685  |
| Point | Image | Vx     | Vy     |
| 81    | 1     | 0.033  | -0.892 |
| 81    | 2     | -0.039 | 0.898  |
| Point | Image | Vx     | Vy     |
| 82    | 1     | 0.032  | -0.873 |
| 82    | 2     | -0.038 | 0.879  |
| Point | Image | Vx     | Vy     |
| 83    | 1     | 0.030  | -0.813 |
| 83    | 2     | -0.035 | 0.818  |
| Point | Image | Vx     | Vy     |
| 84    | 1     | 0.051  | -1.395 |
| 84    | 2     | -0.061 | 1.406  |
| Point | Image | Vx     | Vy     |
| 85    | 1     | 0.081  | -2.241 |
| 85    | 2     | -0.098 | 2.266  |
| Point | Image | Vx     | Vy     |
| 86    | 1     | 0.066  | -1.788 |
| 86    | 2     | -0.077 | 1.807  |
| Point | Image | Vx     | Vy     |
| 87    | 1     | -0.038 | 1.009  |
| 87    | 2     | 0.042  | -1.002 |
| Point | Image | Vx     | Vy     |
| 88    | 1     | -0.034 | 0.901  |
| 88    | 2     | 0.037  | -0.897 |
| Point | Image | Vx     | Vy     |
| 89    | 1     | -0.032 | 0.831  |
| 89    | 2     | 0.034  | -0.825 |
| Point | Image | Vx     | Vy     |
| 90    | 1     | -0.033 | 0.859  |
| 90    | 2     | 0.035  | -0.854 |
| Point | Image | Vx     | Vy     |
| 91    | 1     | -0.018 | 0.469  |
| 91    | 2     | 0.019  | -0.467 |
| Point | Image | Vx     | Vy     |
| 92    | 1     | -0.035 | 0.938  |
| 92    | 2     | 0.039  | -0.934 |
| Point | Image | Vx     | Vy     |
| 93    | 1     | -0.013 | 0.343  |
| 93    | 2     | 0.014  | -0.342 |
| Point | Image | Vx     | Vy     |
| 94    | 1     | 0.007  | -0.194 |
| 94    | 2     | -0.008 | 0.193  |
| Point | Image | Vx     | Vy     |
| 95    | 1     | 0.017  | -0.444 |

|       |       |        |        |
|-------|-------|--------|--------|
| 95    | 2     | -0.018 | 0.444  |
| Point | Image | Vx     | Vy     |
| 96    | 1     | 0.020  | -0.510 |
| 96    | 2     | -0.021 | 0.509  |
| Point | Image | Vx     | Vy     |
| 97    | 1     | 0.021  | -0.546 |
| 97    | 2     | -0.023 | 0.550  |
| Point | Image | Vx     | Vy     |
| 98    | 1     | 0.031  | -0.825 |
| 98    | 2     | -0.035 | 0.832  |
| Point | Image | Vx     | Vy     |
| 99    | 1     | 0.022  | -0.586 |
| 99    | 2     | -0.024 | 0.590  |
| Point | Image | Vx     | Vy     |
| 100   | 1     | 0.007  | -0.191 |
| 100   | 2     | -0.008 | 0.190  |
| Point | Image | Vx     | Vy     |
| 101   | 1     | -0.020 | 0.510  |
| 101   | 2     | 0.021  | -0.508 |
| Point | Image | Vx     | Vy     |
| 102   | 1     | -0.014 | 0.361  |
| 102   | 2     | 0.015  | -0.360 |
| Point | Image | Vx     | Vy     |
| 103   | 1     | 0.019  | -0.497 |
| 103   | 2     | -0.020 | 0.496  |
| Point | Image | Vx     | Vy     |
| 104   | 1     | 0.005  | -0.127 |
| 104   | 2     | -0.005 | 0.127  |
| Point | Image | Vx     | Vy     |
| 105   | 1     | 0.023  | -0.601 |
| 105   | 2     | -0.025 | 0.605  |
| Point | Image | Vx     | Vy     |
| 106   | 1     | 0.014  | -0.361 |
| 106   | 2     | -0.015 | 0.364  |
| Point | Image | Vx     | Vy     |
| 107   | 1     | 0.015  | -0.377 |
| 107   | 2     | -0.016 | 0.380  |
| Point | Image | Vx     | Vy     |
| 108   | 1     | 0.025  | -0.630 |
| 108   | 2     | -0.026 | 0.637  |
| Point | Image | Vx     | Vy     |
| 109   | 1     | 0.039  | -1.023 |
| 109   | 2     | -0.042 | 1.034  |
| Point | Image | Vx     | Vy     |
| 110   | 1     | 0.021  | -0.530 |

|       |       |        |        |
|-------|-------|--------|--------|
| 110   | 2     | -0.021 | 0.527  |
| Point | Image | Vx     | Vy     |
| 111   | 1     | -0.000 | 0.012  |
| 111   | 2     | 0.000  | -0.012 |
| Point | Image | Vx     | Vy     |
| 112   | 1     | 0.002  | -0.051 |
| 112   | 2     | -0.002 | 0.050  |
| Point | Image | Vx     | Vy     |
| 113   | 1     | 0.001  | -0.024 |
| 113   | 2     | -0.001 | 0.024  |
| Point | Image | Vx     | Vy     |
| 114   | 1     | 0.005  | -0.125 |
| 114   | 2     | -0.005 | 0.126  |
| Point | Image | Vx     | Vy     |
| 115   | 1     | 0.009  | -0.233 |
| 115   | 2     | -0.009 | 0.235  |
| Point | Image | Vx     | Vy     |
| 116   | 1     | 0.004  | -0.107 |
| 116   | 2     | -0.004 | 0.107  |
| Point | Image | Vx     | Vy     |
| 117   | 1     | 0.002  | -0.051 |
| 117   | 2     | -0.002 | 0.051  |
| Point | Image | Vx     | Vy     |
| 118   | 1     | 0.003  | -0.085 |
| 118   | 2     | -0.003 | 0.086  |
| Point | Image | Vx     | Vy     |
| 119   | 1     | -0.007 | 0.176  |
| 119   | 2     | 0.007  | -0.178 |
| Point | Image | Vx     | Vy     |
| 120   | 1     | 0.011  | -0.283 |
| 120   | 2     | -0.011 | 0.282  |
| Point | Image | Vx     | Vy     |
| 121   | 1     | 0.011  | -0.275 |
| 121   | 2     | -0.011 | 0.274  |
| Point | Image | Vx     | Vy     |
| 122   | 1     | 0.002  | -0.060 |
| 122   | 2     | -0.002 | 0.060  |
| Point | Image | Vx     | Vy     |
| 123   | 1     | 0.002  | -0.057 |
| 123   | 2     | -0.002 | 0.057  |
| Point | Image | Vx     | Vy     |
| 124   | 1     | -0.017 | 0.412  |
| 124   | 2     | 0.016  | -0.415 |
| Point | Image | Vx     | Vy     |
| 125   | 1     | -0.001 | 0.019  |

|       |       |        |        |
|-------|-------|--------|--------|
| 125   | 2     | 0.001  | -0.019 |
| Point | Image | Vx     | Vy     |
| 126   | 1     | -0.034 | 0.830  |
| 126   | 2     | 0.033  | -0.836 |
| Point | Image | Vx     | Vy     |
| 127   | 1     | -0.017 | 0.423  |
| 127   | 2     | 0.017  | -0.426 |
| Point | Image | Vx     | Vy     |
| 128   | 1     | -0.030 | 0.730  |
| 128   | 2     | 0.029  | -0.737 |
| Point | Image | Vx     | Vy     |
| 129   | 1     | -0.037 | 0.897  |
| 129   | 2     | 0.035  | -0.906 |
| Point | Image | Vx     | Vy     |
| 130   | 1     | 0.046  | -1.116 |
| 130   | 2     | -0.042 | 1.109  |
| Point | Image | Vx     | Vy     |
| 131   | 1     | -0.001 | 0.017  |
| 131   | 2     | 0.001  | -0.017 |
| Point | Image | Vx     | Vy     |
| 132   | 1     | 0.000  | -0.004 |
| 132   | 2     | -0.000 | 0.004  |
| Point | Image | Vx     | Vy     |
| 133   | 1     | 0.002  | -0.049 |
| 133   | 2     | -0.002 | 0.049  |
| Point | Image | Vx     | Vy     |
| 134   | 1     | 0.002  | -0.045 |
| 134   | 2     | -0.002 | 0.044  |
| Point | Image | Vx     | Vy     |
| 135   | 1     | 0.014  | -0.339 |
| 135   | 2     | -0.013 | 0.338  |
| Point | Image | Vx     | Vy     |
| 136   | 1     | 0.008  | -0.194 |
| 136   | 2     | -0.007 | 0.194  |
| Point | Image | Vx     | Vy     |
| 137   | 1     | 0.012  | -0.291 |
| 137   | 2     | -0.011 | 0.291  |
| Point | Image | Vx     | Vy     |
| 138   | 1     | 0.012  | -0.293 |
| 138   | 2     | -0.011 | 0.293  |
| Point | Image | Vx     | Vy     |
| 139   | 1     | -0.016 | 0.380  |
| 139   | 2     | 0.014  | -0.379 |
| Point | Image | Vx     | Vy     |
| 140   | 1     | -0.043 | 1.037  |

|       |       |        |        |
|-------|-------|--------|--------|
| 140   | 2     | 0.040  | -1.045 |
| Point | Image | Vx     | Vy     |
| 141   | 1     | -0.048 | 1.156  |
| 141   | 2     | 0.045  | -1.166 |
| Point | Image | Vx     | Vy     |
| 142   | 1     | -0.050 | 1.198  |
| 142   | 2     | 0.046  | -1.208 |
| Point | Image | Vx     | Vy     |
| 143   | 1     | -0.055 | 1.334  |
| 143   | 2     | 0.051  | -1.344 |
| Point | Image | Vx     | Vy     |
| 144   | 1     | -0.049 | 1.189  |
| 144   | 2     | 0.046  | -1.199 |
| Point | Image | Vx     | Vy     |
| 145   | 1     | 0.102  | -2.383 |
| 145   | 2     | -0.086 | 2.363  |
| Point | Image | Vx     | Vy     |
| 146   | 1     | 0.021  | -0.505 |
| 146   | 2     | -0.019 | 0.503  |
| Point | Image | Vx     | Vy     |
| 147   | 1     | 0.007  | -0.176 |
| 147   | 2     | -0.007 | 0.176  |
| Point | Image | Vx     | Vy     |
| 148   | 1     | -0.009 | 0.220  |
| 148   | 2     | 0.008  | -0.220 |
| Point | Image | Vx     | Vy     |
| 149   | 1     | -0.011 | 0.266  |
| 149   | 2     | 0.010  | -0.265 |
| Point | Image | Vx     | Vy     |
| 150   | 1     | -0.015 | 0.352  |
| 150   | 2     | 0.013  | -0.352 |
| Point | Image | Vx     | Vy     |
| 151   | 1     | -0.023 | 0.533  |
| 151   | 2     | 0.020  | -0.533 |
| Point | Image | Vx     | Vy     |
| 152   | 1     | -0.015 | 0.358  |
| 152   | 2     | 0.013  | -0.358 |
| Point | Image | Vx     | Vy     |
| 153   | 1     | -0.018 | 0.429  |
| 153   | 2     | 0.016  | -0.429 |
| Point | Image | Vx     | Vy     |
| 154   | 1     | -0.098 | 2.291  |
| 154   | 2     | 0.085  | -2.311 |
| Point | Image | Vx     | Vy     |
| 155   | 1     | -0.101 | 2.375  |

|       |       |        |        |
|-------|-------|--------|--------|
| 155   | 2     | 0.088  | -2.395 |
| Point | Image | Vx     | Vy     |
| 156   | 1     | -0.105 | 2.458  |
| 156   | 2     | 0.091  | -2.479 |
| Point | Image | Vx     | Vy     |
| 157   | 1     | 0.092  | -2.134 |
| 157   | 2     | -0.077 | 2.118  |
| Point | Image | Vx     | Vy     |
| 158   | 1     | 0.092  | -2.083 |
| 158   | 2     | -0.073 | 2.068  |
| Point | Image | Vx     | Vy     |
| 159   | 1     | -0.025 | 0.567  |
| 159   | 2     | 0.020  | -0.566 |
| Point | Image | Vx     | Vy     |
| 160   | 1     | -0.049 | 1.114  |
| 160   | 2     | 0.040  | -1.114 |
| Point | Image | Vx     | Vy     |
| 161   | 1     | -0.123 | 2.862  |
| 161   | 2     | 0.105  | -2.886 |
| Point | Image | Vx     | Vy     |
| 162   | 1     | -0.149 | 3.433  |
| 162   | 2     | 0.125  | -3.465 |
| Point | Image | Vx     | Vy     |
| 163   | 1     | -0.151 | 3.466  |
| 163   | 2     | 0.126  | -3.499 |
| Point | Image | Vx     | Vy     |
| 164   | 1     | -0.166 | 3.799  |
| 164   | 2     | 0.138  | -3.837 |
| Point | Image | Vx     | Vy     |
| 165   | 1     | -0.089 | 2.468  |
| 165   | 2     | 0.107  | -2.451 |
| Point | Image | Vx     | Vy     |
| 166   | 1     | -0.055 | 1.509  |
| 166   | 2     | 0.065  | -1.502 |
| Point | Image | Vx     | Vy     |
| 167   | 1     | -0.016 | 0.408  |
| 167   | 2     | 0.016  | -0.411 |
| Point | Image | Vx     | Vy     |
| 168   | 1     | -0.029 | 0.714  |
| 168   | 2     | 0.028  | -0.720 |
| Point | Image | Vx     | Vy     |
| 169   | 1     | -0.086 | 2.377  |
| 169   | 2     | 0.102  | -2.360 |
| Point | Image | Vx     | Vy     |
| 170   | 1     | -0.063 | 1.726  |

|       |       |        |        |
|-------|-------|--------|--------|
| 170   | 2     | 0.074  | -1.718 |
| Point | Image | Vx     | Vy     |
| 171   | 1     | 0.030  | -0.840 |
| 171   | 2     | -0.037 | 0.845  |
| Point | Image | Vx     | Vy     |
| 172   | 1     | -0.027 | 0.734  |
| 172   | 2     | 0.031  | -0.732 |
| Point | Image | Vx     | Vy     |
| 173   | 1     | -0.017 | 0.449  |
| 173   | 2     | 0.019  | -0.448 |
| Point | Image | Vx     | Vy     |
| 174   | 1     | -0.008 | 0.216  |
| 174   | 2     | 0.009  | -0.215 |
| Point | Image | Vx     | Vy     |
| 175   | 1     | -0.001 | 0.014  |
| 175   | 2     | 0.001  | -0.014 |
| Point | Image | Vx     | Vy     |
| 176   | 1     | 0.022  | -0.552 |
| 176   | 2     | -0.022 | 0.552  |
| Point | Image | Vx     | Vy     |
| 177   | 1     | 0.025  | -0.651 |
| 177   | 2     | -0.026 | 0.650  |
| Point | Image | Vx     | Vy     |
| 178   | 1     | 0.023  | -0.590 |
| 178   | 2     | -0.024 | 0.592  |
| Point | Image | Vx     | Vy     |
| 179   | 1     | 0.018  | -0.467 |
| 179   | 2     | -0.019 | 0.470  |
| Point | Image | Vx     | Vy     |
| 180   | 1     | 0.018  | -0.460 |
| 180   | 2     | -0.019 | 0.464  |
| Point | Image | Vx     | Vy     |
| 181   | 1     | -0.004 | 0.105  |
| 181   | 2     | 0.004  | -0.105 |
| Point | Image | Vx     | Vy     |
| 182   | 1     | 0.004  | -0.098 |
| 182   | 2     | -0.004 | 0.099  |
| Point | Image | Vx     | Vy     |
| 183   | 1     | -0.011 | 0.268  |
| 183   | 2     | 0.011  | -0.271 |
| Point | Image | Vx     | Vy     |
| 184   | 1     | 0.034  | -0.824 |
| 184   | 2     | -0.031 | 0.822  |
| Point | Image | Vx     | Vy     |
| 185   | 1     | -0.017 | 0.392  |



|       |       |        |        |
|-------|-------|--------|--------|
| 185   | 2     | 0.015  | -0.392 |
| Point | Image | Vx     | Vy     |
| 186   | 1     | -0.040 | 0.985  |
| 186   | 2     | 0.038  | -0.992 |
| Point | Image | Vx     | Vy     |
| 187   | 1     | -0.065 | 1.546  |
| 187   | 2     | 0.059  | -1.558 |
| Point | Image | Vx     | Vy     |
| 188   | 1     | -0.072 | 1.718  |
| 188   | 2     | 0.065  | -1.731 |
| Point | Image | Vx     | Vy     |
| 189   | 1     | -0.095 | 2.224  |
| 189   | 2     | 0.083  | -2.242 |
| Point | Image | Vx     | Vy     |
| 190   | 1     | -0.023 | 0.519  |
| 190   | 2     | 0.019  | -0.518 |
| Point | Image | Vx     | Vy     |
| 191   | 1     | -0.033 | 0.769  |
| 191   | 2     | 0.028  | -0.769 |
| Point | Image | Vx     | Vy     |
| 192   | 1     | -0.023 | 0.600  |
| 192   | 2     | 0.025  | -0.598 |
| Point | Image | Vx     | Vy     |
| 193   | 1     | 0.082  | -1.976 |
| 193   | 2     | -0.075 | 1.972  |
| Point | Image | Vx     | Vy     |
| 194   | 1     | -0.007 | 0.177  |
| 194   | 2     | 0.007  | -0.177 |
| Point | Image | Vx     | Vy     |
| 195   | 1     | 0.018  | -0.456 |
| 195   | 2     | -0.019 | 0.459  |
| Point | Image | Vx     | Vy     |
| 196   | 1     | 0.004  | -0.094 |
| 196   | 2     | -0.004 | 0.093  |
| Point | Image | Vx     | Vy     |
| 197   | 1     | -0.070 | 1.662  |
| 197   | 2     | 0.063  | -1.675 |
| Point | Image | Vx     | Vy     |
| 198   | 1     | -0.077 | 2.101  |
| 198   | 2     | 0.089  | -2.083 |
| Point | Image | Vx     | Vy     |
| 199   | 1     | -0.064 | 1.739  |
| 199   | 2     | 0.074  | -1.729 |
| Point | Image | Vx     | Vy     |
| 200   | 1     | -0.065 | 1.787  |

|       |       |        |        |
|-------|-------|--------|--------|
| 200   | 2     | 0.077  | -1.778 |
| Point | Image | Vx     | Vy     |
| 201   | 1     | 0.033  | -0.892 |
| 201   | 2     | -0.038 | 0.897  |
| Point | Image | Vx     | Vy     |
| 202   | 1     | 0.028  | -0.753 |
| 202   | 2     | -0.032 | 0.758  |
| Point | Image | Vx     | Vy     |
| 203   | 1     | -0.006 | 0.143  |
| 203   | 2     | 0.006  | -0.143 |
| Point | Image | Vx     | Vy     |
| 204   | 1     | 0.005  | -0.128 |
| 204   | 2     | -0.005 | 0.128  |
| Point | Image | Vx     | Vy     |
| 205   | 1     | 0.001  | -0.022 |
| 205   | 2     | -0.001 | 0.022  |
| Point | Image | Vx     | Vy     |
| 206   | 1     | 0.011  | -0.279 |
| 206   | 2     | -0.011 | 0.278  |
| Point | Image | Vx     | Vy     |
| 207   | 1     | -0.004 | 0.103  |
| 207   | 2     | 0.004  | -0.103 |
| Point | Image | Vx     | Vy     |
| 208   | 1     | 0.063  | -1.542 |
| 208   | 2     | -0.060 | 1.540  |
| Point | Image | Vx     | Vy     |
| 209   | 1     | 0.184  | -4.511 |
| 209   | 2     | -0.174 | 4.504  |
| Point | Image | Vx     | Vy     |
| 210   | 1     | 0.009  | -0.202 |
| 210   | 2     | -0.008 | 0.202  |
| Point | Image | Vx     | Vy     |
| 211   | 1     | -0.011 | 0.255  |
| 211   | 2     | 0.010  | -0.255 |
| Point | Image | Vx     | Vy     |
| 212   | 1     | -0.017 | 0.414  |
| 212   | 2     | 0.016  | -0.416 |
| Point | Image | Vx     | Vy     |
| 213   | 1     | -0.029 | 0.653  |
| 213   | 2     | 0.023  | -0.653 |
| Point | Image | Vx     | Vy     |
| 214   | 1     | -0.075 | 1.710  |
| 214   | 2     | 0.061  | -1.719 |
| Point | Image | Vx     | Vy     |
| 215   | 1     | 0.184  | -4.502 |

|       |       |        |        |
|-------|-------|--------|--------|
| 215   | 2     | -0.173 | 4.494  |
| Point | Image | Vx     | Vy     |
| 216   | 1     | -0.046 | 1.122  |
| 216   | 2     | 0.043  | -1.131 |
| Point | Image | Vx     | Vy     |
| 217   | 1     | -0.037 | 0.916  |
| 217   | 2     | 0.036  | -0.924 |
| Point | Image | Vx     | Vy     |
| 218   | 1     | 0.033  | -0.896 |
| 218   | 2     | -0.039 | 0.902  |
| Point | Image | Vx     | Vy     |
| 219   | 1     | -0.038 | 0.885  |
| 219   | 2     | 0.032  | -0.884 |
| Point | Image | Vx     | Vy     |
| 220   | 1     | -0.109 | 2.550  |
| 220   | 2     | 0.095  | -2.572 |
| Point | Image | Vx     | Vy     |
| 221   | 1     | 0.063  | -1.759 |
| 221   | 2     | -0.078 | 1.775  |
| Point | Image | Vx     | Vy     |
| 222   | 1     | 0.012  | -0.329 |
| 222   | 2     | -0.014 | 0.331  |
| Point | Image | Vx     | Vy     |
| 223   | 1     | 0.026  | -0.676 |
| 223   | 2     | -0.028 | 0.681  |
| Point | Image | Vx     | Vy     |
| 224   | 1     | 0.127  | -3.142 |
| 224   | 2     | -0.122 | 3.139  |
| Point | Image | Vx     | Vy     |
| 225   | 1     | -0.033 | 0.800  |
| 225   | 2     | 0.031  | -0.806 |
| Point | Image | Vx     | Vy     |
| 226   | 1     | -0.004 | 0.101  |
| 226   | 2     | 0.004  | -0.100 |
| Point | Image | Vx     | Vy     |
| 227   | 1     | -0.052 | 1.199  |
| 227   | 2     | 0.043  | -1.206 |
| Point | Image | Vx     | Vy     |
| 228   | 1     | -0.052 | 1.178  |
| 228   | 2     | 0.042  | -1.179 |
| Point | Image | Vx     | Vy     |
| 229   | 1     | 0.053  | -1.439 |
| 229   | 2     | -0.061 | 1.444  |
| Point | Image | Vx     | Vy     |
| 230   | 1     | 0.018  | -0.484 |

|       |       |        |        |
|-------|-------|--------|--------|
| 230   | 2     | -0.020 | 0.488  |
| Point | Image | Vx     | Vy     |
| 231   | 1     | 0.054  | -1.476 |
| 231   | 2     | -0.064 | 1.489  |
| Point | Image | Vx     | Vy     |
| 232   | 1     | -0.055 | 1.474  |
| 232   | 2     | 0.062  | -1.465 |
| Point | Image | Vx     | Vy     |
| 233   | 1     | 0.017  | -0.452 |
| 233   | 2     | -0.019 | 0.455  |
| Point | Image | Vx     | Vy     |
| 234   | 1     | 0.006  | -0.145 |
| 234   | 2     | -0.006 | 0.145  |
| Point | Image | Vx     | Vy     |
| 235   | 1     | 0.002  | -0.057 |
| 235   | 2     | -0.002 | 0.057  |
| Point | Image | Vx     | Vy     |
| 236   | 1     | 0.149  | -3.652 |
| 236   | 2     | -0.141 | 3.647  |
| Point | Image | Vx     | Vy     |
| 237   | 1     | -0.038 | 0.922  |
| 237   | 2     | 0.036  | -0.930 |
| Point | Image | Vx     | Vy     |
| 238   | 1     | -0.042 | 1.032  |
| 238   | 2     | 0.040  | -1.040 |
| Point | Image | Vx     | Vy     |
| 239   | 1     | -0.040 | 0.990  |
| 239   | 2     | 0.039  | -0.998 |
| Point | Image | Vx     | Vy     |
| 240   | 1     | -0.174 | 3.962  |
| 240   | 2     | 0.143  | -4.003 |
| Point | Image | Vx     | Vy     |
| 241   | 1     | -0.008 | 0.214  |
| 241   | 2     | 0.009  | -0.213 |
| Point | Image | Vx     | Vy     |
| 242   | 1     | -0.021 | 0.534  |
| 242   | 2     | 0.021  | -0.539 |
| Point | Image | Vx     | Vy     |
| 243   | 1     | -0.078 | 1.918  |
| 243   | 2     | 0.075  | -1.935 |
| Point | Image | Vx     | Vy     |
| 244   | 1     | 0.091  | -2.111 |
| 244   | 2     | -0.076 | 2.095  |
| Point | Image | Vx     | Vy     |
| 245   | 1     | 0.020  | -0.561 |

245 2 -0.024 0.564

| Point | Image | Vx     | Vy     |
|-------|-------|--------|--------|
| 246   | 1     | 0.001  | -0.027 |
| 246   | 2     | -0.001 | 0.027  |

| Point | Image | Vx     | Vy     |
|-------|-------|--------|--------|
| 247   | 1     | 0.037  | -0.987 |
| 247   | 2     | -0.042 | 0.995  |

| Point | Image | Vx     | Vy     |
|-------|-------|--------|--------|
| 248   | 1     | 0.016  | -0.383 |
| 248   | 2     | -0.015 | 0.381  |

| Point | Image | Vx     | Vy     |
|-------|-------|--------|--------|
| 249   | 1     | -0.104 | 2.564  |
| 249   | 2     | 0.101  | -2.583 |

| Point | Image | Vx     | Vy     |
|-------|-------|--------|--------|
| 250   | 1     | 0.145  | -3.380 |
| 250   | 2     | -0.123 | 3.371  |

| Point | Image | Vx     | Vy     |
|-------|-------|--------|--------|
| 251   | 1     | -0.012 | 0.283  |
| 251   | 2     | 0.010  | -0.283 |

| Point | Image | Vx     | Vy     |
|-------|-------|--------|--------|
| 252   | 1     | -0.083 | 1.957  |
| 252   | 2     | 0.074  | -1.973 |

| Point | Image | Vx     | Vy     |
|-------|-------|--------|--------|
| 253   | 1     | 0.121  | -2.787 |
| 253   | 2     | -0.099 | 2.764  |

| Point | Image | Vx     | Vy     |
|-------|-------|--------|--------|
| 254   | 1     | -0.164 | 3.766  |
| 254   | 2     | 0.137  | -3.804 |

| Point | Image | Vx     | Vy     |
|-------|-------|--------|--------|
| 255   | 1     | 0.052  | -1.431 |
| 255   | 2     | -0.062 | 1.443  |

| Point | Image | Vx     | Vy     |
|-------|-------|--------|--------|
| 256   | 1     | 0.012  | -0.298 |
| 256   | 2     | -0.012 | 0.298  |

| Point | Image | Vx     | Vy     |
|-------|-------|--------|--------|
| 257   | 1     | 0.031  | -0.740 |
| 257   | 2     | -0.028 | 0.740  |

| Point | Image | Vx     | Vy     |
|-------|-------|--------|--------|
| 258   | 1     | 0.107  | -2.425 |
| 258   | 2     | -0.085 | 2.405  |

Mean error of 542 image points: ax=-0.000, ay=-0.000

RMSE of 542 image points: mx=0.083, my=2.104

The coordinates of object points

| Point ID | X           | Y            | Z        | Overlap |
|----------|-------------|--------------|----------|---------|
| 1        | 505042.8910 | 4037516.5530 | 334.0000 | 2       |
| 2        | 505094.4580 | 4037516.0800 | 334.0000 | 2       |

| Point | Image | Vx     | Vy     |
|-------|-------|--------|--------|
| 259   | 1     | 0.001  | -0.033 |
| 259   | 2     | -0.001 | 0.033  |

| Point | Image | Vx     | Vy     |
|-------|-------|--------|--------|
| 260   | 1     | 0.365  | -8.894 |
| 260   | 2     | -0.339 | 8.892  |

| Point | Image | Vx     | Vy     |
|-------|-------|--------|--------|
| 261   | 1     | 0.126  | -3.520 |
| 261   | 2     | -0.153 | 3.512  |

| Point | Image | Vx     | Vy     |
|-------|-------|--------|--------|
| 262   | 1     | -0.131 | 3.536  |
| 262   | 2     | 0.151  | -3.546 |

| Point | Image | Vx     | Vy     |
|-------|-------|--------|--------|
| 263   | 1     | 0.318  | -8.634 |
| 263   | 2     | -0.368 | 8.704  |

| Point | Image | Vx     | Vy     |
|-------|-------|--------|--------|
| 264   | 1     | -0.012 | 0.319  |
| 264   | 2     | 0.013  | -0.318 |

| Point | Image | Vx     | Vy     |
|-------|-------|--------|--------|
| 265   | 1     | -0.028 | 0.653  |
| 265   | 2     | 0.023  | -0.648 |

| Point | Image | Vx     | Vy     |
|-------|-------|--------|--------|
| 266   | 1     | -0.013 | 0.338  |
| 266   | 2     | 0.014  | -0.337 |

| Point | Image | Vx     | Vy     |
|-------|-------|--------|--------|
| 267   | 1     | 0.025  | -0.652 |
| 267   | 2     | -0.027 | 0.656  |

| Point | Image | Vx     | Vy     |
|-------|-------|--------|--------|
| 268   | 1     | 0.001  | -0.015 |
| 268   | 2     | -0.001 | 0.015  |

| Point | Image | Vx     | Vy     |
|-------|-------|--------|--------|
| 269   | 1     | -0.011 | 0.263  |
| 269   | 2     | 0.010  | -0.263 |

| Point | Image | Vx     | Vy     |
|-------|-------|--------|--------|
| 270   | 1     | -0.275 | 6.729  |
| 270   | 2     | 0.260  | -6.701 |

| Point | Image | Vx     | Vy     |
|-------|-------|--------|--------|
| 271   | 1     | 0.118  | -2.709 |
| 271   | 2     | -0.097 | 2.708  |

|    |             |              |          |   |
|----|-------------|--------------|----------|---|
| 3  | 505007.0820 | 4037333.8840 | 322.0000 | 2 |
| 4  | 504713.0510 | 4037614.9930 | 313.0000 | 2 |
| 5  | 504601.8990 | 4037669.2790 | 312.0000 | 2 |
| 6  | 504340.9410 | 4037581.9580 | 315.0000 | 2 |
| 7  | 503546.4500 | 4037696.7940 | 318.0000 | 2 |
| 8  | 504478.7140 | 4037059.9280 | 316.0000 | 2 |
| 9  | 504376.8300 | 4037267.7550 | 314.0000 | 2 |
| 10 | 505031.1530 | 4036802.0190 | 316.0000 | 2 |
| 11 | 504065.0060 | 4036910.2330 | 315.0000 | 2 |
| 12 | 503746.9370 | 4036772.5050 | 317.0000 | 2 |
| 13 | 503729.2680 | 4037192.5400 | 316.0000 | 2 |
| 14 | 503942.2510 | 4037348.2760 | 315.0000 | 2 |
| 15 | 503389.4730 | 4037819.3980 | 318.0000 | 2 |
| 16 | 503808.0140 | 4038084.4600 | 316.0000 | 2 |
| 17 | 504560.0830 | 4038214.9560 | 314.0000 | 2 |
| 18 | 503804.0810 | 4038515.1330 | 319.0000 | 2 |
| 19 | 503608.5600 | 4038248.3830 | 318.0000 | 2 |
| 20 | 503281.3510 | 4038858.2580 | 316.0000 | 2 |
| 21 | 503261.1760 | 4038610.6980 | 317.0000 | 2 |
| 22 | 503902.7970 | 4038860.3510 | 318.0000 | 2 |
| 23 | 504362.1760 | 4038971.5810 | 310.0000 | 2 |
| 24 | 504129.2060 | 4038708.1280 | 319.0000 | 2 |
| 25 | 504257.1420 | 4038479.5220 | 316.0000 | 2 |
| 26 | 504293.1000 | 4038251.4910 | 315.0000 | 2 |
| 27 | 504745.8870 | 4037983.4050 | 312.0000 | 2 |
| 28 | 505231.9530 | 4038041.9560 | 314.0000 | 2 |
| 29 | 505051.9480 | 4038347.4890 | 316.0000 | 2 |
| 30 | 506309.0260 | 4039214.0090 | 316.0000 | 2 |
| 31 | 507272.1840 | 4036813.5980 | 315.0000 | 2 |
| 32 | 506873.0320 | 4037624.2000 | 316.0000 | 2 |
| 33 | 506794.4240 | 4038491.2990 | 316.0000 | 2 |
| 34 | 507639.9260 | 4038506.3540 | 319.0000 | 2 |
| 35 | 507298.6220 | 4038476.2790 | 318.0000 | 2 |
| 36 | 507038.2880 | 4038695.1040 | 317.0000 | 2 |
| 37 | 506963.1070 | 4039105.8870 | 319.0000 | 2 |
| 38 | 507661.3230 | 4037215.6830 | 316.0000 | 2 |
| 39 | 505697.2910 | 4039181.2020 | 317.0000 | 2 |
| 40 | 505887.7620 | 4038816.2940 | 319.0000 | 2 |
| 41 | 505774.1650 | 4038371.0970 | 317.0000 | 2 |
| 42 | 505891.5230 | 4037879.9820 | 316.0000 | 2 |
| 43 | 506063.1880 | 4037621.5870 | 318.0000 | 2 |
| 44 | 506215.7290 | 4037264.6540 | 317.0000 | 2 |
| 45 | 506582.2600 | 4036829.4190 | 317.0000 | 2 |
| 46 | 505456.8260 | 4036646.0290 | 309.0000 | 2 |
| 47 | 505439.1030 | 4037015.5450 | 312.0000 | 2 |
| 48 | 504887.1530 | 4036988.2390 | 311.0000 | 2 |
| 49 | 504841.9650 | 4038413.2080 | 311.0000 | 2 |
| 50 | 505017.5520 | 4038866.7640 | 315.0000 | 2 |
| 51 | 503798.0520 | 4037531.3530 | 315.0000 | 2 |
| 52 | 504236.9120 | 4037747.3880 | 317.0000 | 2 |
| 53 | 505431.5500 | 4038920.9460 | 318.0000 | 2 |
| 54 | 505307.0470 | 4038392.0040 | 315.0000 | 2 |
| 55 | 507538.4570 | 4037915.1830 | 317.0000 | 2 |
| 56 | 506170.9790 | 4038500.7010 | 319.0000 | 2 |
| 57 | 503896.5982 | 4038964.7259 | 321.7708 | 2 |
| 58 | 503975.4732 | 4038959.1282 | 322.2420 | 2 |
| 59 | 503850.6524 | 4038826.6041 | 321.3275 | 2 |
| 60 | 504219.9102 | 4039028.1599 | 321.6138 | 2 |
| 61 | 504349.4360 | 4038983.7908 | 321.1873 | 2 |
| 62 | 504332.6992 | 4038937.3326 | 321.3574 | 2 |

|     |             |              |          |   |
|-----|-------------|--------------|----------|---|
| 63  | 504528.6350 | 4038996.4607 | 321.4757 | 2 |
| 64  | 506307.4179 | 4039193.5892 | 315.8467 | 2 |
| 65  | 506505.7114 | 4039121.7306 | 316.3972 | 2 |
| 66  | 506483.9245 | 4039094.2069 | 316.2101 | 2 |
| 67  | 506935.6149 | 4039170.9978 | 315.7817 | 2 |
| 68  | 506837.2788 | 4039113.6835 | 315.4551 | 2 |
| 69  | 504100.9572 | 4038694.6551 | 320.6899 | 2 |
| 70  | 504355.4353 | 4038766.0624 | 320.1699 | 2 |
| 71  | 504476.1070 | 4038659.9088 | 319.7792 | 2 |
| 72  | 504681.4624 | 4038827.9786 | 319.9402 | 2 |
| 73  | 504612.5398 | 4038808.2822 | 321.2268 | 2 |
| 74  | 504665.6013 | 4038733.4878 | 319.9729 | 2 |
| 75  | 504604.3792 | 4038626.2275 | 319.4817 | 2 |
| 76  | 504585.8066 | 4038573.8820 | 320.4213 | 2 |
| 77  | 504754.8856 | 4038596.4529 | 319.4510 | 2 |
| 78  | 504936.6487 | 4038720.6982 | 319.3316 | 2 |
| 79  | 506452.1786 | 4038986.2734 | 316.4122 | 2 |
| 80  | 506476.0784 | 4038907.1442 | 316.6421 | 2 |
| 81  | 506567.4917 | 4039034.7741 | 316.5862 | 2 |
| 82  | 506549.8028 | 4038983.2104 | 316.6139 | 2 |
| 83  | 506525.8766 | 4038882.3604 | 317.3055 | 2 |
| 84  | 506789.7153 | 4039076.1077 | 316.4685 | 2 |
| 85  | 507365.1661 | 4039133.1058 | 315.7058 | 2 |
| 86  | 507308.8519 | 4038912.0484 | 317.0937 | 2 |
| 87  | 504243.2358 | 4038425.7213 | 319.1813 | 2 |
| 88  | 504455.5377 | 4038404.0923 | 319.6502 | 2 |
| 89  | 504325.3521 | 4038371.9055 | 319.5820 | 2 |
| 90  | 504323.6088 | 4038328.4414 | 318.9269 | 2 |
| 91  | 504585.9439 | 4038240.5173 | 318.7377 | 2 |
| 92  | 504651.4179 | 4038491.0217 | 319.7337 | 2 |
| 93  | 504888.6753 | 4038507.6036 | 318.1052 | 2 |
| 94  | 505031.1239 | 4038382.7315 | 319.5177 | 2 |
| 95  | 505095.1440 | 4038341.8573 | 318.9228 | 2 |
| 96  | 505104.4794 | 4038306.1063 | 318.5506 | 2 |
| 97  | 506522.9779 | 4038566.7777 | 318.5406 | 2 |
| 98  | 506722.9198 | 4038644.4245 | 318.4241 | 2 |
| 99  | 506696.1338 | 4038505.7433 | 319.6222 | 2 |
| 100 | 504295.9251 | 4038188.8026 | 318.0236 | 2 |
| 101 | 504625.7490 | 4038192.4754 | 318.5936 | 2 |
| 102 | 504759.5743 | 4038196.0742 | 318.7843 | 2 |
| 103 | 505109.5823 | 4038259.5196 | 318.6448 | 2 |
| 104 | 505088.7031 | 4038121.4838 | 319.1636 | 2 |
| 105 | 506620.9101 | 4038426.8018 | 319.9186 | 2 |
| 106 | 506644.8194 | 4038254.9595 | 320.6923 | 2 |
| 107 | 506678.4798 | 4038391.5498 | 319.6421 | 2 |
| 108 | 507259.3311 | 4038305.5606 | 322.2235 | 2 |
| 109 | 507301.0629 | 4038447.7564 | 321.7307 | 2 |
| 110 | 504566.3082 | 4037658.4403 | 317.1732 | 2 |
| 111 | 504817.7349 | 4037683.7095 | 317.5908 | 2 |
| 112 | 505126.7600 | 4037983.0417 | 316.5265 | 2 |
| 113 | 505223.9875 | 4037977.7811 | 318.7832 | 2 |
| 114 | 506641.3208 | 4038163.0532 | 320.4882 | 2 |
| 115 | 506645.9221 | 4038145.8147 | 320.9463 | 2 |
| 116 | 506679.4886 | 4038137.9756 | 320.9051 | 2 |
| 117 | 507158.7166 | 4038141.0541 | 323.0002 | 2 |
| 118 | 507200.6823 | 4038132.4673 | 323.3315 | 2 |
| 119 | 507170.8458 | 4038065.8791 | 323.0931 | 2 |
| 120 | 504676.9156 | 4037575.6531 | 316.7783 | 2 |
| 121 | 504784.8282 | 4037523.2997 | 316.5809 | 2 |
| 122 | 504952.8350 | 4037692.3603 | 317.6637 | 2 |

|     |             |              |          |   |
|-----|-------------|--------------|----------|---|
| 123 | 505358.9018 | 4037567.2729 | 318.7764 | 2 |
| 124 | 506718.2182 | 4037838.0753 | 322.8088 | 2 |
| 125 | 506778.0329 | 4037829.2483 | 323.0733 | 2 |
| 126 | 506722.0867 | 4037785.5714 | 323.4384 | 2 |
| 127 | 506755.3953 | 4037784.7947 | 323.0057 | 2 |
| 128 | 507031.3469 | 4037734.7091 | 323.7049 | 2 |
| 129 | 507021.2400 | 4037670.5824 | 322.0531 | 2 |
| 130 | 504370.9756 | 4037253.8647 | 314.2308 | 2 |
| 131 | 504869.4258 | 4037379.0524 | 317.1583 | 2 |
| 132 | 504890.1838 | 4037276.9226 | 314.8565 | 2 |
| 133 | 504931.3408 | 4037281.6993 | 314.9588 | 2 |
| 134 | 504886.2986 | 4037102.5153 | 314.0449 | 2 |
| 135 | 505351.1581 | 4037424.0188 | 318.7301 | 2 |
| 136 | 505352.8953 | 4037393.9679 | 315.7363 | 2 |
| 137 | 505339.7050 | 4037330.4479 | 317.1369 | 2 |
| 138 | 505314.6873 | 4037322.3008 | 316.6485 | 2 |
| 139 | 505354.8671 | 4037181.5031 | 317.0025 | 2 |
| 140 | 506834.9852 | 4037594.5942 | 321.9248 | 2 |
| 141 | 506918.6477 | 4037597.0236 | 323.1630 | 2 |
| 142 | 506890.8359 | 4037526.0696 | 322.9628 | 2 |
| 143 | 506817.7388 | 4037499.5166 | 322.9622 | 2 |
| 144 | 506896.0845 | 4037593.6549 | 322.7673 | 2 |
| 145 | 503984.5359 | 4036819.3483 | 308.1492 | 2 |
| 146 | 504482.9746 | 4037014.9861 | 311.0539 | 2 |
| 147 | 504974.4961 | 4037058.2002 | 314.9973 | 2 |
| 148 | 505228.3233 | 4037112.4304 | 316.4822 | 2 |
| 149 | 505228.1297 | 4037037.0300 | 316.2140 | 2 |
| 150 | 505372.4038 | 4037154.4149 | 317.1772 | 2 |
| 151 | 505409.6507 | 4037159.8573 | 317.2778 | 2 |
| 152 | 505378.2928 | 4037095.9118 | 316.7924 | 2 |
| 153 | 505438.0154 | 4037016.3082 | 318.0058 | 2 |
| 154 | 506941.3174 | 4037177.7846 | 325.2214 | 2 |
| 155 | 506902.8987 | 4037143.1990 | 325.5101 | 2 |
| 156 | 506930.6520 | 4037141.6539 | 325.9462 | 2 |
| 157 | 504147.1110 | 4036716.3116 | 309.2092 | 2 |
| 158 | 504259.7599 | 4036450.8079 | 308.7855 | 2 |
| 159 | 505237.1813 | 4036773.3686 | 315.7677 | 2 |
| 160 | 505496.2235 | 4036684.4155 | 318.4562 | 2 |
| 161 | 506940.8794 | 4037017.1356 | 325.9119 | 2 |
| 162 | 507092.1578 | 4036913.0438 | 327.6149 | 2 |
| 163 | 507149.6208 | 4036900.8480 | 328.3797 | 2 |
| 164 | 507249.8744 | 4036845.5900 | 329.5260 | 2 |
| 165 | 504177.7426 | 4038972.9432 | 321.4248 | 2 |
| 166 | 504560.2097 | 4038881.6506 | 320.1821 | 2 |
| 167 | 506675.3761 | 4037946.1294 | 322.0513 | 2 |
| 168 | 506825.7927 | 4037723.0123 | 323.6744 | 2 |
| 169 | 504118.4226 | 4038934.7831 | 321.6330 | 2 |
| 170 | 504503.7185 | 4038845.4042 | 320.9124 | 2 |
| 171 | 506514.8619 | 4039100.6220 | 316.4975 | 2 |
| 172 | 504883.0470 | 4038740.9082 | 318.8539 | 2 |
| 173 | 504877.9728 | 4038403.7512 | 319.1910 | 2 |
| 174 | 504841.7382 | 4038283.6076 | 318.2352 | 2 |
| 175 | 504883.3798 | 4038012.4251 | 317.4795 | 2 |
| 176 | 505164.8787 | 4038071.2606 | 318.7569 | 2 |
| 177 | 505197.3145 | 4038074.8356 | 319.0234 | 2 |
| 178 | 505888.8443 | 4038260.5024 | 317.9071 | 2 |
| 179 | 506647.0337 | 4038317.5030 | 320.0318 | 2 |
| 180 | 506722.2472 | 4038405.5797 | 318.4344 | 2 |
| 181 | 506713.9813 | 4037991.0940 | 322.3658 | 2 |
| 182 | 507251.5753 | 4038095.8927 | 323.3740 | 2 |

|     |             |              |          |   |
|-----|-------------|--------------|----------|---|
| 183 | 507005.3250 | 4037907.6339 | 324.1234 | 2 |
| 184 | 505031.4957 | 4037333.7021 | 315.7032 | 2 |
| 185 | 505359.7088 | 4037183.6582 | 316.8954 | 2 |
| 186 | 506829.9074 | 4037625.0925 | 321.9588 | 2 |
| 187 | 506874.6845 | 4037424.7647 | 323.7426 | 2 |
| 188 | 506843.0641 | 4037324.1109 | 324.1128 | 2 |
| 189 | 506871.1415 | 4037188.2908 | 324.9464 | 2 |
| 190 | 505274.3166 | 4036778.7971 | 315.9183 | 2 |
| 191 | 505371.8747 | 4036749.4915 | 316.2406 | 2 |
| 192 | 504657.4408 | 4038339.2209 | 318.1147 | 2 |
| 193 | 505100.4935 | 4037378.1420 | 317.7202 | 2 |
| 194 | 505472.7734 | 4037230.1616 | 317.8392 | 2 |
| 195 | 506617.2902 | 4038233.3222 | 320.4353 | 2 |
| 196 | 504951.1759 | 4037237.1950 | 315.5940 | 2 |
| 197 | 506862.9723 | 4037360.6643 | 323.6032 | 2 |
| 198 | 503860.8047 | 4038779.3336 | 320.4215 | 2 |
| 199 | 504409.1302 | 4038764.5420 | 320.3323 | 2 |
| 200 | 504522.1161 | 4038860.5375 | 321.6612 | 2 |
| 201 | 506543.8277 | 4038941.5340 | 317.0356 | 2 |
| 202 | 506509.0996 | 4038921.6156 | 317.0205 | 2 |
| 203 | 504957.8476 | 4038213.7505 | 318.2419 | 2 |
| 204 | 505025.5857 | 4038142.6537 | 318.4943 | 2 |
| 205 | 505009.8870 | 4038121.2496 | 318.7210 | 2 |
| 206 | 504874.4895 | 4037427.0805 | 317.4459 | 2 |
| 207 | 504924.8265 | 4037687.1246 | 317.1757 | 2 |
| 208 | 505217.7916 | 4037596.5148 | 319.7951 | 2 |
| 209 | 505184.3825 | 4037551.9278 | 317.9485 | 2 |
| 210 | 504907.1640 | 4037156.0131 | 314.5782 | 2 |
| 211 | 505213.9548 | 4037163.0691 | 316.6467 | 2 |
| 212 | 506213.7207 | 4037314.4302 | 319.2143 | 2 |
| 213 | 505387.8563 | 4036660.9771 | 316.9735 | 2 |
| 214 | 506429.2889 | 4036746.8597 | 322.5429 | 2 |
| 215 | 505132.5354 | 4037522.0212 | 316.4715 | 2 |
| 216 | 506872.1405 | 4037608.5750 | 322.7423 | 2 |
| 217 | 506995.5123 | 4037692.3913 | 322.6109 | 2 |
| 218 | 506537.3995 | 4039066.4971 | 316.3429 | 2 |
| 219 | 505407.4560 | 4036753.6409 | 317.2156 | 2 |
| 220 | 506973.2590 | 4037124.2545 | 325.5907 | 2 |
| 221 | 506998.8885 | 4039301.7123 | 314.8994 | 2 |
| 222 | 506472.2521 | 4038868.2714 | 316.6954 | 2 |
| 223 | 506705.0160 | 4038644.7631 | 318.2278 | 2 |
| 224 | 505296.8150 | 4037640.7256 | 312.0804 | 2 |
| 225 | 506806.8139 | 4037732.3789 | 323.4858 | 2 |
| 226 | 505232.3744 | 4037196.3036 | 315.5008 | 2 |
| 227 | 506448.0185 | 4036783.7484 | 322.8420 | 2 |
| 228 | 505631.9313 | 4036655.8037 | 317.7692 | 2 |
| 229 | 505909.3802 | 4038777.7243 | 316.6031 | 2 |
| 230 | 507067.1020 | 4038692.4944 | 319.1178 | 2 |
| 231 | 506939.7060 | 4039112.9998 | 316.0274 | 2 |
| 232 | 504298.0696 | 4038665.7222 | 320.0908 | 2 |
| 233 | 506658.5930 | 4038399.4026 | 319.7183 | 2 |
| 234 | 505060.8605 | 4037722.2691 | 317.9347 | 2 |
| 235 | 504888.9683 | 4037621.5436 | 318.2078 | 2 |
| 236 | 505224.3186 | 4037556.2163 | 318.0633 | 2 |
| 237 | 506936.2520 | 4037722.2397 | 323.8432 | 2 |
| 238 | 506794.7865 | 4037666.3193 | 322.1908 | 2 |
| 239 | 506940.4572 | 4037703.8159 | 322.8869 | 2 |
| 240 | 507295.5484 | 4036797.9456 | 330.0114 | 2 |
| 241 | 504694.4794 | 4038156.5293 | 317.5652 | 2 |
| 242 | 507003.7137 | 4037987.4024 | 322.2611 | 2 |

|     |             |              |          |   |
|-----|-------------|--------------|----------|---|
| 243 | 506967.0282 | 4037712.4768 | 315.5857 | 2 |
| 244 | 504147.4926 | 4036713.9980 | 309.2076 | 2 |
| 245 | 506412.0166 | 4039136.9817 | 316.5655 | 2 |
| 246 | 504926.1011 | 4038739.7409 | 319.2828 | 2 |
| 247 | 506741.8090 | 4038732.7239 | 318.4673 | 2 |
| 248 | 504731.8896 | 4037515.6173 | 316.0402 | 2 |
| 249 | 506783.3060 | 4037798.9575 | 309.9281 | 2 |
| 250 | 505026.5589 | 4036895.6174 | 267.9588 | 2 |
| 251 | 505432.0077 | 4037031.0512 | 317.6451 | 2 |
| 252 | 506882.1718 | 4037261.6148 | 324.3609 | 2 |
| 253 | 504011.2885 | 4036596.2671 | 306.3991 | 2 |
| 254 | 507217.1078 | 4036882.6080 | 329.3633 | 2 |
| 255 | 506849.5447 | 4039014.9190 | 315.9370 | 2 |
| 256 | 505942.1834 | 4037825.1008 | 317.8201 | 2 |
| 257 | 505312.2208 | 4037322.3373 | 321.0007 | 2 |
| 258 | 504095.1286 | 4036409.5062 | 305.9175 | 2 |
| 259 | 506646.4053 | 4038019.5715 | 320.2800 | 2 |
| 260 | 505398.7748 | 4037483.5694 | 318.1728 | 2 |
| 261 | 504968.3628 | 4039134.9284 | 308.5868 | 2 |
| 262 | 505891.6732 | 4038831.2768 | 314.2652 | 2 |
| 263 | 506817.5122 | 4038882.5068 | 332.2422 | 2 |
| 264 | 505001.1387 | 4038545.7233 | 315.6698 | 2 |
| 265 | 504103.1865 | 4036617.6229 | 363.5526 | 2 |
| 266 | 504870.0135 | 4038316.3410 | 315.7135 | 2 |
| 267 | 506513.3137 | 4038603.1763 | 317.4795 | 2 |
| 268 | 505915.7034 | 4037861.1149 | 311.9026 | 2 |
| 269 | 505184.4898 | 4037197.4582 | 312.8917 | 2 |
| 270 | 504698.4655 | 4037530.4738 | 334.2671 | 2 |
| 271 | 505433.3822 | 4036710.1410 | 315.2334 | 2 |

The total object points = 271

The residuals of image points

|       |       |         |        |   |   |        |       |
|-------|-------|---------|--------|---|---|--------|-------|
| Point | Image | Vx      | Vy     | 7 | 2 | -1.248 | 1.543 |
| 1     | 1     | -13.964 | -4.934 |   |   |        |       |
| 1     | 2     | -3.959  | 3.272  |   |   |        |       |
| Point | Image | Vx      | Vy     |   |   |        |       |
| 2     | 1     | -15.229 | -5.096 |   |   |        |       |
| 2     | 2     | -5.701  | 4.128  |   |   |        |       |
| Point | Image | Vx      | Vy     |   |   |        |       |
| 3     | 1     | -4.875  | -3.415 |   |   |        |       |
| 3     | 2     | -1.972  | -1.154 |   |   |        |       |
| Point | Image | Vx      | Vy     |   |   |        |       |
| 4     | 1     | 0.943   | -1.997 |   |   |        |       |
| 4     | 2     | -1.520  | -1.897 |   |   |        |       |
| Point | Image | Vx      | Vy     |   |   |        |       |
| 5     | 1     | -0.137  | -1.369 |   |   |        |       |
| 5     | 2     | -1.643  | 0.298  |   |   |        |       |
| Point | Image | Vx      | Vy     |   |   |        |       |
| 6     | 1     | -0.628  | -1.972 |   |   |        |       |
| 6     | 2     | -3.489  | -0.121 |   |   |        |       |
| Point | Image | Vx      | Vy     |   |   |        |       |
| 7     | 1     | 3.784   | -1.173 |   |   |        |       |
| Point | Image | Vx      | Vy     |   |   |        |       |
| 8     | 1     | -1.095  | -2.249 |   |   |        |       |
| 8     | 2     | -1.971  | 0.172  |   |   |        |       |
| Point | Image | Vx      | Vy     |   |   |        |       |
| 9     | 1     | -1.478  | 5.094  |   |   |        |       |
| 9     | 2     | -2.737  | 7.546  |   |   |        |       |
| Point | Image | Vx      | Vy     |   |   |        |       |
| 10    | 1     | -3.934  | -2.465 |   |   |        |       |
| 10    | 2     | -2.791  | -2.088 |   |   |        |       |
| Point | Image | Vx      | Vy     |   |   |        |       |
| 11    | 1     | -1.186  | -4.500 |   |   |        |       |
| 11    | 2     | -3.069  | 0.619  |   |   |        |       |
| Point | Image | Vx      | Vy     |   |   |        |       |
| 12    | 1     | 0.840   | -5.944 |   |   |        |       |
| 12    | 2     | -2.224  | -0.420 |   |   |        |       |
| Point | Image | Vx      | Vy     |   |   |        |       |
| 13    | 1     | 1.606   | -2.922 |   |   |        |       |
| 13    | 2     | -3.964  | 1.788  |   |   |        |       |



| Point | Image | Vx     | Vy     |
|-------|-------|--------|--------|
| 14    | 1     | 1.105  | -3.689 |
| 14    | 2     | -4.412 | 0.500  |

| Point | Image | Vx     | Vy     |
|-------|-------|--------|--------|
| 15    | 1     | 5.364  | -1.284 |
| 15    | 2     | -1.667 | 1.752  |

| Point | Image | Vx    | Vy      |
|-------|-------|-------|---------|
| 16    | 1     | 0.704 | -12.773 |
| 16    | 2     | 1.538 | 2.999   |

| Point | Image | Vx     | Vy     |
|-------|-------|--------|--------|
| 17    | 1     | 0.463  | -0.447 |
| 17    | 2     | -1.303 | -1.091 |

| Point | Image | Vx     | Vy    |
|-------|-------|--------|-------|
| 18    | 1     | -1.920 | 4.085 |
| 18    | 2     | -3.502 | 1.629 |

| Point | Image | Vx     | Vy     |
|-------|-------|--------|--------|
| 19    | 1     | 1.276  | 7.694  |
| 19    | 2     | -2.169 | -0.165 |

| Point | Image | Vx     | Vy    |
|-------|-------|--------|-------|
| 20    | 1     | 3.135  | 7.605 |
| 20    | 2     | -4.013 | 1.861 |

| Point | Image | Vx     | Vy    |
|-------|-------|--------|-------|
| 21    | 1     | 12.199 | 6.735 |
| 21    | 2     | 4.129  | 3.561 |

| Point | Image | Vx     | Vy    |
|-------|-------|--------|-------|
| 22    | 1     | -0.096 | 6.241 |
| 22    | 2     | -1.439 | 2.777 |

| Point | Image | Vx    | Vy    |
|-------|-------|-------|-------|
| 23    | 1     | 9.524 | 4.871 |
| 23    | 2     | 7.022 | 1.018 |

| Point | Image | Vx     | Vy     |
|-------|-------|--------|--------|
| 24    | 1     | -0.342 | 2.436  |
| 24    | 2     | -1.221 | -0.949 |

| Point | Image | Vx     | Vy    |
|-------|-------|--------|-------|
| 25    | 1     | -0.801 | 2.537 |
| 25    | 2     | -2.462 | 0.532 |

| Point | Image | Vx     | Vy     |
|-------|-------|--------|--------|
| 26    | 1     | 2.053  | -0.154 |
| 26    | 2     | -0.734 | -0.369 |

| Point | Image | Vx     | Vy     |
|-------|-------|--------|--------|
| 27    | 1     | -5.107 | -7.052 |
| 27    | 2     | -8.341 | -6.686 |

| Point | Image | Vx     | Vy     |
|-------|-------|--------|--------|
| 28    | 1     | 0.042  | -2.125 |
| 28    | 2     | -1.436 | -2.461 |

| Point | Image | Vx     | Vy     |
|-------|-------|--------|--------|
| 29    | 1     | -2.760 | -0.640 |
| 29    | 2     | -1.930 | -0.294 |

| Point | Image | Vx     | Vy     |
|-------|-------|--------|--------|
| 30    | 1     | -9.642 | -1.047 |
| 30    | 2     | -5.958 | -0.084 |

| Point | Image | Vx    | Vy    |
|-------|-------|-------|-------|
| 31    | 1     | 7.529 | 9.239 |
| 31    | 2     | 2.519 | 3.749 |

| Point | Image | Vx    | Vy    |
|-------|-------|-------|-------|
| 32    | 1     | 3.364 | 2.260 |
| 32    | 2     | 0.524 | 1.253 |

| Point | Image | Vx     | Vy     |
|-------|-------|--------|--------|
| 33    | 1     | -2.149 | 1.778  |
| 33    | 2     | -5.600 | -2.830 |

| Point | Image | Vx    | Vy    |
|-------|-------|-------|-------|
| 34    | 1     | 9.784 | 0.910 |
| 34    | 2     | 3.022 | 5.165 |

| Point | Image | Vx     | Vy    |
|-------|-------|--------|-------|
| 35    | 1     | 10.802 | 0.942 |
| 35    | 2     | 6.782  | 1.027 |

| Point | Image | Vx     | Vy    |
|-------|-------|--------|-------|
| 36    | 1     | 1.099  | 2.648 |
| 36    | 2     | -0.462 | 5.194 |

| Point | Image | Vx    | Vy     |
|-------|-------|-------|--------|
| 37    | 1     | 2.717 | -0.653 |
| 37    | 2     | 1.427 | 0.547  |

| Point | Image | Vx     | Vy    |
|-------|-------|--------|-------|
| 38    | 1     | 10.881 | 7.521 |
| 38    | 2     | 1.556  | 2.323 |

| Point | Image | Vx     | Vy     |
|-------|-------|--------|--------|
| 39    | 1     | -3.206 | -2.252 |
| 39    | 2     | -0.036 | -1.470 |

| Point | Image | Vx     | Vy     |
|-------|-------|--------|--------|
| 40    | 1     | -2.836 | -8.738 |
| 40    | 2     | -2.938 | -7.685 |

| Point | Image | Vx     | Vy     |
|-------|-------|--------|--------|
| 41    | 1     | -3.892 | -0.894 |
| 41    | 2     | -0.941 | -0.097 |

| Point | Image | Vx    | Vy     |
|-------|-------|-------|--------|
| 42    | 1     | 5.338 | -6.726 |
| 42    | 2     | 4.536 | -6.677 |

| Point | Image | Vx    | Vy     |
|-------|-------|-------|--------|
| 43    | 1     | 0.360 | -0.893 |
| 43    | 2     | 1.065 | -0.063 |

| Point | Image | Vx    | Vy     |
|-------|-------|-------|--------|
| 44    | 1     | 2.458 | 2.669  |
| 44    | 2     | 1.685 | -0.443 |

| Point | Image | Vx    | Vy     |
|-------|-------|-------|--------|
| 45    | 1     | 2.218 | 2.868  |
| 45    | 2     | 2.975 | -0.667 |

| Point | Image | Vx     | Vy    |
|-------|-------|--------|-------|
| 46    | 1     | -2.713 | 9.102 |
| 46    | 2     | -2.574 | 7.485 |

| Point | Image | Vx     | Vy     |
|-------|-------|--------|--------|
| 47    | 1     | -0.555 | -1.102 |
| 47    | 2     | -1.747 | -1.590 |

| Point | Image | Vx     | Vy     |
|-------|-------|--------|--------|
| 48    | 1     | 0.940  | -1.866 |
| 48    | 2     | -1.762 | -1.356 |

| Point | Image | Vx     | Vy    |
|-------|-------|--------|-------|
| 49    | 1     | -2.168 | 0.872 |
| 49    | 2     | -4.127 | 1.337 |

| Point | Image | Vx     | Vy     |
|-------|-------|--------|--------|
| 50    | 1     | -0.554 | -1.572 |
| 50    | 2     | -0.831 | -4.530 |

| Point | Image | Vx     | Vy     |
|-------|-------|--------|--------|
| 51    | 1     | 2.320  | -0.878 |
| 51    | 2     | -2.356 | 1.491  |

| Point | Image | Vx     | Vy    |
|-------|-------|--------|-------|
| 52    | 1     | -1.106 | 2.178 |
| 52    | 2     | -1.894 | 3.201 |

| Point | Image | Vx      | Vy     |
|-------|-------|---------|--------|
| 53    | 1     | -14.426 | -2.856 |
| 53    | 2     | -3.989  | -4.542 |

| Point | Image | Vx    | Vy     |
|-------|-------|-------|--------|
| 54    | 1     | 9.007 | -0.472 |
| 54    | 2     | 2.590 | -3.106 |

| Point | Image | Vx      | Vy      |
|-------|-------|---------|---------|
| 55    | 1     | -15.690 | -19.894 |
| 55    | 2     | -2.575  | 18.627  |

| Point | Image | Vx    | Vy     |
|-------|-------|-------|--------|
| 56    | 1     | 1.709 | -5.485 |
| 56    | 2     | 4.379 | -5.694 |

| Point | Image | Vx     | Vy     |
|-------|-------|--------|--------|
| 57    | 1     | -0.033 | 0.838  |
| 57    | 2     | -1.512 | -4.132 |

| Point | Image | Vx     | Vy     |
|-------|-------|--------|--------|
| 58    | 1     | -0.027 | 0.713  |
| 58    | 2     | -1.050 | -3.765 |

| Point | Image | Vx     | Vy     |
|-------|-------|--------|--------|
| 59    | 1     | -0.013 | 0.411  |
| 59    | 2     | -2.136 | -3.667 |

| Point | Image | Vx     | Vy     |
|-------|-------|--------|--------|
| 60    | 1     | -0.062 | 1.453  |
| 60    | 2     | 0.448  | -3.795 |

| Point | Image | Vx     | Vy     |
|-------|-------|--------|--------|
| 61    | 1     | -0.051 | 1.222  |
| 61    | 2     | 0.953  | -3.179 |

| Point | Image | Vx     | Vy     |
|-------|-------|--------|--------|
| 62    | 1     | -0.045 | 1.101  |
| 62    | 2     | 0.791  | -3.104 |

| Point | Image | Vx     | Vy     |
|-------|-------|--------|--------|
| 63    | 1     | -0.049 | 1.184  |
| 63    | 2     | 1.679  | -2.633 |

| Point | Image | Vx     | Vy    |
|-------|-------|--------|-------|
| 64    | 1     | -0.049 | 1.182 |
| 64    | 2     | 1.252  | 2.389 |

| Point | Image | Vx     | Vy    |
|-------|-------|--------|-------|
| 65    | 1     | -0.040 | 0.981 |
| 65    | 2     | 0.360  | 2.633 |

| Point | Image | Vx     | Vy    |
|-------|-------|--------|-------|
| 66    | 1     | -0.034 | 0.868 |
| 66    | 2     | 0.475  | 2.561 |

| Point | Image | Vx     | Vy    |
|-------|-------|--------|-------|
| 67    | 1     | -0.027 | 0.706 |
| 67    | 2     | -2.229 | 4.007 |

| Point | Image | Vx     | Vy    |
|-------|-------|--------|-------|
| 68    | 1     | -0.041 | 1.007 |
| 68    | 2     | -1.515 | 3.178 |

| Point | Image | Vx     | Vy     |
|-------|-------|--------|--------|
| 69    | 1     | -0.010 | 0.327  |
| 69    | 2     | -0.874 | -2.758 |

| Point | Image | Vx     | Vy     |
|-------|-------|--------|--------|
| 70    | 1     | -0.034 | 0.872  |
| 70    | 2     | 0.589  | -2.762 |

| Point | Image | Vx    | Vy     |
|-------|-------|-------|--------|
| 71    | 1     | 0.004 | 0.016  |
| 71    | 2     | 0.900 | -1.587 |

| Point | Image | Vx     | Vy     |
|-------|-------|--------|--------|
| 72    | 1     | -0.026 | 0.700  |
| 72    | 2     | 1.922  | -1.828 |

| Point | Image | Vx     | Vy     |
|-------|-------|--------|--------|
| 73    | 1     | -0.028 | 0.752  |
| 73    | 2     | 1.668  | -2.050 |

| Point | Image | Vx     | Vy     |
|-------|-------|--------|--------|
| 74    | 1     | -0.019 | 0.534  |
| 74    | 2     | 1.733  | -1.722 |

| Point | Image | Vx     | Vy     |
|-------|-------|--------|--------|
| 75    | 1     | -0.021 | 0.565  |
| 75    | 2     | 1.373  | -1.866 |

| Point | Image | Vx     | Vy     |
|-------|-------|--------|--------|
| 76    | 1     | -0.019 | 0.531  |
| 76    | 2     | 1.223  | -1.849 |

| Point | Image | Vx     | Vy     |
|-------|-------|--------|--------|
| 77    | 1     | -0.001 | 0.124  |
| 77    | 2     | 1.813  | -1.144 |

| Point | Image | Vx    | Vy     |
|-------|-------|-------|--------|
| 78    | 1     | 0.024 | -0.415 |
| 78    | 2     | 2.404 | -0.228 |

| Point | Image | Vx     | Vy    |
|-------|-------|--------|-------|
| 79    | 1     | -0.028 | 0.726 |
| 79    | 2     | 0.667  | 2.109 |

| Point | Image | Vx     | Vy    |
|-------|-------|--------|-------|
| 80    | 1     | -0.020 | 0.557 |
| 80    | 2     | 0.586  | 1.942 |

| Point | Image | Vx     | Vy    |
|-------|-------|--------|-------|
| 81    | 1     | -0.028 | 0.743 |
| 81    | 2     | 0.082  | 2.530 |

| Point | Image | Vx     | Vy    |
|-------|-------|--------|-------|
| 82    | 1     | -0.022 | 0.613 |
| 82    | 2     | 0.194  | 2.367 |

| Point | Image | Vx     | Vy    |
|-------|-------|--------|-------|
| 83    | 1     | -0.013 | 0.406 |
| 83    | 2     | 0.357  | 2.048 |

| Point | Image | Vx     | Vy    |
|-------|-------|--------|-------|
| 84    | 1     | -0.021 | 0.570 |
| 84    | 2     | -1.206 | 3.309 |

| Point | Image | Vx     | Vy    |
|-------|-------|--------|-------|
| 85    | 1     | -0.016 | 0.461 |
| 85    | 2     | -5.522 | 4.707 |

| Point | Image | Vx     | Vy    |
|-------|-------|--------|-------|
| 86    | 1     | -0.000 | 0.098 |
| 86    | 2     | -4.760 | 3.476 |

| Point | Image | Vx     | Vy     |
|-------|-------|--------|--------|
| 87    | 1     | -0.004 | 0.145  |
| 87    | 2     | -0.596 | -1.900 |

| Point | Image | Vx     | Vy     |
|-------|-------|--------|--------|
| 88    | 1     | -0.006 | 0.199  |
| 88    | 2     | 0.416  | -1.588 |

| Point | Image | Vx     | Vy     |
|-------|-------|--------|--------|
| 89    | 1     | -0.000 | 0.067  |
| 89    | 2     | -0.266 | -1.607 |

| Point | Image | Vx     | Vy     |
|-------|-------|--------|--------|
| 90    | 1     | -0.004 | 0.132  |
| 90    | 2     | -0.344 | -1.602 |

| Point | Image | Vx    | Vy     |
|-------|-------|-------|--------|
| 91    | 1     | 0.004 | -0.053 |
| 91    | 2     | 0.724 | -0.962 |

| Point | Image | Vx     | Vy     |
|-------|-------|--------|--------|
| 92    | 1     | -0.011 | 0.329  |
| 92    | 2     | 1.340  | -1.493 |

| Point | Image | Vx    | Vy     |
|-------|-------|-------|--------|
| 93    | 1     | 0.008 | -0.100 |
| 93    | 2     | 2.072 | -0.700 |

| Point | Image | Vx    | Vy     |
|-------|-------|-------|--------|
| 94    | 1     | 0.026 | -0.551 |
| 94    | 2     | 2.247 | -0.072 |

| Point | Image | Vx    | Vy     |
|-------|-------|-------|--------|
| 95    | 1     | 0.035 | -0.770 |
| 95    | 2     | 2.326 | 0.214  |

| Point | Image | Vx    | Vy     |
|-------|-------|-------|--------|
| 96    | 1     | 0.037 | -0.831 |
| 96    | 2     | 2.310 | 0.283  |

| Point | Image | Vx    | Vy     |
|-------|-------|-------|--------|
| 97    | 1     | 0.004 | -0.008 |
| 97    | 2     | 0.528 | 1.108  |

| Point | Image | Vx     | Vy     |
|-------|-------|--------|--------|
| 98    | 1     | 0.005  | -0.031 |
| 98    | 2     | -0.510 | 1.602  |

| Point | Image | Vx     | Vy     |
|-------|-------|--------|--------|
| 99    | 1     | 0.007  | -0.103 |
| 99    | 2     | -0.264 | 1.061  |

| Point | Image | Vx     | Vy     |
|-------|-------|--------|--------|
| 100   | 1     | 0.033  | -0.791 |
| 100   | 2     | -0.764 | -0.447 |

| Point | Image | Vx     | Vy     |
|-------|-------|--------|--------|
| 101   | 1     | -0.000 | 0.039  |
| 101   | 2     | 0.822  | -0.950 |

| Point | Image | Vx    | Vy     |
|-------|-------|-------|--------|
| 102   | 1     | 0.004 | -0.063 |
| 102   | 2     | 1.318 | -0.733 |

| Point | Image | Vx    | Vy     |
|-------|-------|-------|--------|
| 103   | 1     | 0.036 | -0.814 |
| 103   | 2     | 2.279 | 0.272  |

| Point | Image | Vx    | Vy     |
|-------|-------|-------|--------|
| 104   | 1     | 0.018 | -0.426 |
| 104   | 2     | 2.132 | -0.087 |

| Point | Image | Vx    | Vy     |
|-------|-------|-------|--------|
| 105   | 1     | 0.015 | -0.296 |
| 105   | 2     | 0.156 | 0.915  |

| Point | Image | Vx    | Vy     |
|-------|-------|-------|--------|
| 106   | 1     | 0.016 | -0.357 |
| 106   | 2     | 0.165 | 0.375  |

| Point | Image | Vx     | Vy     |
|-------|-------|--------|--------|
| 107   | 1     | 0.008  | -0.124 |
| 107   | 2     | -0.090 | 0.628  |

| Point | Image | Vx     | Vy     |
|-------|-------|--------|--------|
| 108   | 1     | 0.022  | -0.504 |
| 108   | 2     | -3.563 | 0.618  |

| Point | Image | Vx     | Vy     |
|-------|-------|--------|--------|
| 109   | 1     | 0.024  | -0.531 |
| 109   | 2     | -4.075 | 1.357  |

| Point | Image | Vx     | Vy     |
|-------|-------|--------|--------|
| 110   | 1     | 0.013  | -0.426 |
| 110   | 2     | -0.190 | 0.625  |

| Point | Image | Vx     | Vy    |
|-------|-------|--------|-------|
| 111   | 1     | -0.003 | 0.025 |
| 111   | 2     | 0.927  | 0.038 |

| Point | Image | Vx    | Vy     |
|-------|-------|-------|--------|
| 112   | 1     | 0.012 | -0.298 |
| 112   | 2     | 2.102 | -0.113 |

| Point | Image | Vx    | Vy     |
|-------|-------|-------|--------|
| 113   | 1     | 0.011 | -0.266 |
| 113   | 2     | 2.279 | -0.128 |

| Point | Image | Vx    | Vy     |
|-------|-------|-------|--------|
| 114   | 1     | 0.012 | -0.270 |
| 114   | 2     | 0.252 | -0.007 |

| Point | Image | Vx    | Vy     |
|-------|-------|-------|--------|
| 115   | 1     | 0.017 | -0.405 |
| 115   | 2     | 0.239 | 0.075  |

| Point | Image | Vx    | Vy     |
|-------|-------|-------|--------|
| 116   | 1     | 0.013 | -0.292 |
| 116   | 2     | 0.095 | -0.073 |

| Point | Image | Vx     | Vy     |
|-------|-------|--------|--------|
| 117   | 1     | 0.012  | -0.290 |
| 117   | 2     | -2.629 | -0.291 |

| Point | Image | Vx     | Vy     |
|-------|-------|--------|--------|
| 118   | 1     | 0.015  | -0.350 |
| 118   | 2     | -2.904 | -0.293 |

| Point | Image | Vx     | Vy     |
|-------|-------|--------|--------|
| 119   | 1     | 0.009  | -0.221 |
| 119   | 2     | -2.610 | -0.676 |

| Point | Image | Vx    | Vy     |
|-------|-------|-------|--------|
| 120   | 1     | 0.000 | -0.090 |
| 120   | 2     | 0.224 | 0.484  |

| Point | Image | Vx     | Vy     |
|-------|-------|--------|--------|
| 121   | 1     | -0.001 | -0.049 |
| 121   | 2     | 0.617  | 0.526  |

| Point | Image | Vx    | Vy     |
|-------|-------|-------|--------|
| 122   | 1     | 0.002 | -0.089 |
| 122   | 2     | 1.393 | 0.086  |

| Point | Image | Vx    | Vy     |
|-------|-------|-------|--------|
| 123   | 1     | 0.003 | -0.128 |
| 123   | 2     | 2.240 | 0.072  |

| Point | Image | Vx    | Vy     |
|-------|-------|-------|--------|
| 124   | 1     | 0.007 | -0.199 |
| 124   | 2     | 0.169 | -1.016 |

| Point | Image | Vx     | Vy     |
|-------|-------|--------|--------|
| 125   | 1     | 0.023  | -0.631 |
| 125   | 2     | -0.116 | -0.669 |

| Point | Image | Vx     | Vy     |
|-------|-------|--------|--------|
| 126   | 1     | -0.006 | 0.157  |
| 126   | 2     | 0.211  | -1.498 |

| Point | Image | Vx    | Vy     |
|-------|-------|-------|--------|
| 127   | 1     | 0.009 | -0.270 |
| 127   | 2     | 0.044 | -1.113 |

| Point | Image | Vx     | Vy     |
|-------|-------|--------|--------|
| 128   | 1     | 0.006  | -0.181 |
| 128   | 2     | -1.327 | -1.693 |

| Point | Image | Vx     | Vy     |
|-------|-------|--------|--------|
| 129   | 1     | 0.002  | -0.098 |
| 129   | 2     | -1.195 | -1.941 |

| Point | Image | Vx     | Vy     |
|-------|-------|--------|--------|
| 130   | 1     | 0.001  | -0.193 |
| 130   | 2     | -1.826 | 1.972  |

| Point | Image | Vx     | Vy    |
|-------|-------|--------|-------|
| 131   | 1     | -0.018 | 0.406 |
| 131   | 2     | 0.805  | 0.405 |

| Point | Image | Vx     | Vy    |
|-------|-------|--------|-------|
| 132   | 1     | -0.022 | 0.525 |
| 132   | 2     | 0.787  | 0.565 |

| Point | Image | Vx     | Vy    |
|-------|-------|--------|-------|
| 133   | 1     | -0.019 | 0.443 |
| 133   | 2     | 0.943  | 0.579 |

| Point | Image | Vx     | Vy    |
|-------|-------|--------|-------|
| 134   | 1     | -0.031 | 0.780 |
| 134   | 2     | 0.606  | 0.895 |

| Point | Image | Vx    | Vy     |
|-------|-------|-------|--------|
| 135   | 1     | 0.007 | -0.295 |
| 135   | 2     | 2.144 | 0.465  |

| Point | Image | Vx    | Vy     |
|-------|-------|-------|--------|
| 136   | 1     | 0.001 | -0.128 |
| 136   | 2     | 2.139 | 0.342  |

| Point | Image | Vx    | Vy     |
|-------|-------|-------|--------|
| 137   | 1     | 0.002 | -0.154 |
| 137   | 2     | 2.079 | 0.508  |

| Point | Image | Vx    | Vy     |
|-------|-------|-------|--------|
| 138   | 1     | 0.001 | -0.130 |
| 138   | 2     | 2.028 | 0.534  |

| Point | Image | Vx     | Vy     |
|-------|-------|--------|--------|
| 139   | 1     | -0.026 | 0.665  |
| 139   | 2     | 2.057  | -0.017 |

| Point | Image | Vx     | Vy     |
|-------|-------|--------|--------|
| 140   | 1     | -0.004 | 0.083  |
| 140   | 2     | -0.138 | -2.000 |

| Point | Image | Vx     | Vy     |
|-------|-------|--------|--------|
| 141   | 1     | -0.006 | 0.145  |
| 141   | 2     | -0.549 | -2.193 |

| Point | Image | Vx     | Vy     |
|-------|-------|--------|--------|
| 142   | 1     | -0.006 | 0.132  |
| 142   | 2     | -0.334 | -2.282 |

| Point | Image | Vx     | Vy     |
|-------|-------|--------|--------|
| 143   | 1     | -0.012 | 0.304  |
| 143   | 2     | 0.047  | -2.369 |

| Point | Image | Vx     | Vy     |
|-------|-------|--------|--------|
| 144   | 1     | -0.008 | 0.190  |
| 144   | 2     | -0.430 | -2.209 |

| Point | Image | Vx     | Vy    |
|-------|-------|--------|-------|
| 145   | 1     | -0.010 | 0.024 |
| 145   | 2     | -5.293 | 4.605 |

| Point | Image | Vx     | Vy    |
|-------|-------|--------|-------|
| 146   | 1     | -0.035 | 0.867 |
| 146   | 2     | -1.473 | 1.831 |

| Point | Image | Vx     | Vy    |
|-------|-------|--------|-------|
| 147   | 1     | -0.026 | 0.646 |
| 147   | 2     | 0.898  | 1.035 |

| Point | Image | Vx     | Vy    |
|-------|-------|--------|-------|
| 148   | 1     | -0.028 | 0.712 |
| 148   | 2     | 1.733  | 0.338 |

| Point | Image | Vx     | Vy    |
|-------|-------|--------|-------|
| 149   | 1     | -0.033 | 0.867 |
| 149   | 2     | 1.690  | 0.400 |

| Point | Image | Vx     | Vy    |
|-------|-------|--------|-------|
| 150   | 1     | -0.025 | 0.653 |
| 150   | 2     | 2.076  | 0.027 |

| Point | Image | Vx     | Vy     |
|-------|-------|--------|--------|
| 151   | 1     | -0.030 | 0.793  |
| 151   | 2     | 2.151  | -0.193 |

| Point | Image | Vx     | Vy    |
|-------|-------|--------|-------|
| 152   | 1     | -0.028 | 0.724 |
| 152   | 2     | 2.061  | 0.085 |

| Point | Image | Vx     | Vy    |
|-------|-------|--------|-------|
| 153   | 1     | -0.031 | 0.836 |
| 153   | 2     | 2.140  | 0.056 |

| Point | Image | Vx     | Vy     |
|-------|-------|--------|--------|
| 154   | 1     | -0.031 | 0.896  |
| 154   | 2     | -0.162 | -3.707 |

| Point | Image | Vx     | Vy     |
|-------|-------|--------|--------|
| 155   | 1     | -0.034 | 1.008  |
| 155   | 2     | 0.061  | -3.754 |

| Point | Image | Vx     | Vy     |
|-------|-------|--------|--------|
| 156   | 1     | -0.036 | 1.056  |
| 156   | 2     | -0.063 | -3.877 |

| Point | Image | Vx     | Vy    |
|-------|-------|--------|-------|
| 157   | 1     | -0.022 | 0.414 |
| 157   | 2     | -4.198 | 4.542 |

| Point | Image | Vx     | Vy    |
|-------|-------|--------|-------|
| 158   | 1     | -0.043 | 1.165 |
| 158   | 2     | -3.779 | 5.214 |

| Point | Image | Vx     | Vy    |
|-------|-------|--------|-------|
| 159   | 1     | -0.053 | 1.594 |
| 159   | 2     | 1.574  | 0.520 |

| Point | Image | Vx     | Vy     |
|-------|-------|--------|--------|
| 160   | 1     | -0.061 | 1.932  |
| 160   | 2     | 2.156  | -0.220 |

| Point | Image | Vx     | Vy     |
|-------|-------|--------|--------|
| 161   | 1     | -0.045 | 1.387  |
| 161   | 2     | 0.043  | -4.354 |

| Point | Image | Vx     | Vy     |
|-------|-------|--------|--------|
| 162   | 1     | -0.053 | 1.694  |
| 162   | 2     | -0.548 | -5.217 |

| Point | Image | Vx     | Vy     |
|-------|-------|--------|--------|
| 163   | 1     | -0.051 | 1.632  |
| 163   | 2     | -0.832 | -5.354 |

| Point | Image | Vx     | Vy     |
|-------|-------|--------|--------|
| 164   | 1     | -0.054 | 1.777  |
| 164   | 2     | -1.299 | -5.895 |

| Point | Image | Vx     | Vy     |
|-------|-------|--------|--------|
| 165   | 1     | -0.051 | 1.237  |
| 165   | 2     | 0.123  | -3.691 |

| Point | Image | Vx     | Vy     |
|-------|-------|--------|--------|
| 166   | 1     | -0.029 | 0.772  |
| 166   | 2     | 1.600  | -2.176 |

| Point | Image | Vx    | Vy     |
|-------|-------|-------|--------|
| 167   | 1     | 0.002 | -0.051 |
| 167   | 2     | 0.276 | -0.857 |

| Point | Image | Vx     | Vy     |
|-------|-------|--------|--------|
| 168   | 1     | 0.003  | -0.089 |
| 168   | 2     | -0.223 | -1.527 |

| Point | Image | Vx     | Vy     |
|-------|-------|--------|--------|
| 169   | 1     | -0.045 | 1.078  |
| 169   | 2     | -0.270 | -3.686 |

| Point | Image | Vx     | Vy     |
|-------|-------|--------|--------|
| 170   | 1     | -0.037 | 0.922  |
| 170   | 2     | 1.340  | -2.473 |

| Point | Image | Vx     | Vy    |
|-------|-------|--------|-------|
| 171   | 1     | -0.037 | 0.915 |
| 171   | 2     | 0.323  | 2.607 |

| Point | Image | Vx     | Vy     |
|-------|-------|--------|--------|
| 172   | 1     | -0.010 | 0.319  |
| 172   | 2     | 2.343  | -1.051 |

| Point | Image | Vx    | Vy     |
|-------|-------|-------|--------|
| 173   | 1     | 0.002 | 0.007  |
| 173   | 2     | 1.928 | -0.813 |

| Point | Image | Vx    | Vy     |
|-------|-------|-------|--------|
| 174   | 1     | 0.011 | -0.214 |
| 174   | 2     | 1.680 | -0.578 |

| Point | Image | Vx    | Vy     |
|-------|-------|-------|--------|
| 175   | 1     | 0.011 | -0.270 |
| 175   | 2     | 1.502 | -0.238 |

| Point | Image | Vx    | Vy     |
|-------|-------|-------|--------|
| 176   | 1     | 0.033 | -0.825 |
| 176   | 2     | 2.224 | 0.369  |

| Point | Image | Vx    | Vy     |
|-------|-------|-------|--------|
| 177   | 1     | 0.037 | -0.920 |
| 177   | 2     | 2.279 | 0.473  |

| Point | Image | Vx    | Vy     |
|-------|-------|-------|--------|
| 178   | 1     | 0.030 | -0.683 |
| 178   | 2     | 2.450 | 0.600  |

| Point | Image | Vx    | Vy     |
|-------|-------|-------|--------|
| 179   | 1     | 0.017 | -0.355 |
| 179   | 2     | 0.108 | 0.586  |

| Point | Image | Vx     | Vy     |
|-------|-------|--------|--------|
| 180   | 1     | 0.010  | -0.171 |
| 180   | 2     | -0.324 | 0.739  |

| Point | Image | Vx    | Vy     |
|-------|-------|-------|--------|
| 181   | 1     | 0.012 | -0.304 |
| 181   | 2     | 0.054 | -0.510 |

| Point | Image | Vx     | Vy     |
|-------|-------|--------|--------|
| 182   | 1     | 0.019  | -0.454 |
| 182   | 2     | -3.213 | -0.381 |

| Point | Image | Vx     | Vy     |
|-------|-------|--------|--------|
| 183   | 1     | 0.014  | -0.363 |
| 183   | 2     | -1.386 | -0.953 |

| Point | Image | Vx    | Vy     |
|-------|-------|-------|--------|
| 184   | 1     | 0.012 | -0.473 |
| 184   | 2     | 1.298 | 1.224  |

| Point | Image | Vx     | Vy     |
|-------|-------|--------|--------|
| 185   | 1     | -0.026 | 0.670  |
| 185   | 2     | 2.067  | -0.037 |

| Point | Image | Vx     | Vy     |
|-------|-------|--------|--------|
| 186   | 1     | -0.003 | 0.066  |
| 186   | 2     | -0.145 | -1.912 |

| Point | Image | Vx     | Vy     |
|-------|-------|--------|--------|
| 187   | 1     | -0.015 | 0.400  |
| 187   | 2     | -0.138 | -2.704 |

| Point | Image | Vx     | Vy     |
|-------|-------|--------|--------|
| 188   | 1     | -0.019 | 0.526  |
| 188   | 2     | 0.119  | -2.914 |

| Point | Image | Vx     | Vy     |
|-------|-------|--------|--------|
| 189   | 1     | -0.031 | 0.918  |
| 189   | 2     | 0.151  | -3.537 |

| Point | Image | Vx     | Vy    |
|-------|-------|--------|-------|
| 190   | 1     | -0.050 | 1.485 |
| 190   | 2     | 1.677  | 0.511 |

| Point | Image | Vx     | Vy    |
|-------|-------|--------|-------|
| 191   | 1     | -0.055 | 1.653 |
| 191   | 2     | 1.913  | 0.185 |

| Point | Image | Vx     | Vy     |
|-------|-------|--------|--------|
| 192   | 1     | -0.000 | 0.056  |
| 192   | 2     | 1.147  | -1.098 |

| Point | Image | Vx    | Vy     |
|-------|-------|-------|--------|
| 193   | 1     | 0.056 | -1.724 |
| 193   | 2     | 1.496 | 2.285  |

| Point | Image | Vx     | Vy    |
|-------|-------|--------|-------|
| 194   | 1     | -0.014 | 0.306 |
| 194   | 2     | 2.264  | 0.036 |

| Point | Image | Vx    | Vy     |
|-------|-------|-------|--------|
| 195   | 1     | 0.021 | -0.490 |
| 195   | 2     | 0.301 | 0.439  |

| Point | Image | Vx     | Vy    |
|-------|-------|--------|-------|
| 196   | 1     | -0.020 | 0.452 |
| 196   | 2     | 0.971  | 0.679 |

| Point | Image | Vx     | Vy     |
|-------|-------|--------|--------|
| 197   | 1     | -0.018 | 0.475  |
| 197   | 2     | -0.013 | -2.857 |

| Point | Image | Vx     | Vy     |
|-------|-------|--------|--------|
| 198   | 1     | -0.022 | 0.573  |
| 198   | 2     | -2.163 | -3.723 |

| Point | Image | Vx     | Vy     |
|-------|-------|--------|--------|
| 199   | 1     | -0.034 | 0.840  |
| 199   | 2     | 0.822  | -2.602 |

| Point | Image | Vx     | Vy     |
|-------|-------|--------|--------|
| 200   | 1     | -0.041 | 1.003  |
| 200   | 2     | 1.434  | -2.509 |

| Point | Image | Vx     | Vy    |
|-------|-------|--------|-------|
| 201   | 1     | -0.017 | 0.486 |
| 201   | 2     | 0.242  | 2.280 |

| Point | Image | Vx     | Vy    |
|-------|-------|--------|-------|
| 202   | 1     | -0.020 | 0.547 |
| 202   | 2     | 0.425  | 2.071 |

| Point | Image | Vx    | Vy     |
|-------|-------|-------|--------|
| 203   | 1     | 0.010 | -0.218 |
| 203   | 2     | 1.925 | -0.428 |

| Point | Image | Vx    | Vy     |
|-------|-------|-------|--------|
| 204   | 1     | 0.019 | -0.448 |
| 204   | 2     | 2.011 | -0.111 |

| Point | Image | Vx    | Vy     |
|-------|-------|-------|--------|
| 205   | 1     | 0.014 | -0.338 |
| 205   | 2     | 1.957 | -0.216 |

| Point | Image | Vx     | Vy    |
|-------|-------|--------|-------|
| 206   | 1     | -0.005 | 0.038 |
| 206   | 2     | 0.861  | 0.630 |

| Point | Image | Vx     | Vy     |
|-------|-------|--------|--------|
| 207   | 1     | -0.005 | 0.086  |
| 207   | 2     | 1.305  | -0.069 |

| Point | Image | Vx    | Vy     |
|-------|-------|-------|--------|
| 208   | 1     | 0.055 | -1.571 |
| 208   | 2     | 1.948 | 1.589  |

| Point | Image | Vx    | Vy     |
|-------|-------|-------|--------|
| 209   | 1     | 0.157 | -4.485 |
| 209   | 2     | 1.741 | 4.605  |

| Point | Image | Vx     | Vy    |
|-------|-------|--------|-------|
| 210   | 1     | -0.022 | 0.510 |
| 210   | 2     | 0.731  | 0.945 |

| Point | Image | Vx     | Vy    |
|-------|-------|--------|-------|
| 211   | 1     | -0.027 | 0.690 |
| 211   | 2     | 1.728  | 0.246 |

| Point | Image | Vx    | Vy     |
|-------|-------|-------|--------|
| 212   | 1     | 0.003 | -0.170 |
| 212   | 2     | 2.088 | -0.920 |

| Point | Image | Vx     | Vy    |
|-------|-------|--------|-------|
| 213   | 1     | -0.054 | 1.670 |
| 213   | 2     | 1.910  | 0.433 |

| Point | Image | Vx     | Vy     |
|-------|-------|--------|--------|
| 214   | 1     | -0.033 | 1.013  |
| 214   | 2     | 1.994  | -2.345 |

| Point | Image | Vx    | Vy     |
|-------|-------|-------|--------|
| 215   | 1     | 0.154 | -4.424 |
| 215   | 2     | 1.598 | 4.641  |

| Point | Image | Vx     | Vy     |
|-------|-------|--------|--------|
| 216   | 1     | -0.006 | 0.157  |
| 216   | 2     | -0.328 | -2.105 |

| Point | Image | Vx     | Vy     |
|-------|-------|--------|--------|
| 217   | 1     | 0.001  | -0.033 |
| 217   | 2     | -1.073 | -1.909 |

| Point | Image | Vx     | Vy    |
|-------|-------|--------|-------|
| 218   | 1     | -0.031 | 0.794 |
| 218   | 2     | 0.222  | 2.595 |

| Point | Image | Vx     | Vy    |
|-------|-------|--------|-------|
| 219   | 1     | -0.055 | 1.712 |
| 219   | 2     | 1.996  | 0.015 |

| Point | Image | Vx     | Vy     |
|-------|-------|--------|--------|
| 220   | 1     | -0.036 | 1.081  |
| 220   | 2     | -0.246 | -4.044 |

| Point | Image | Vx     | Vy    |
|-------|-------|--------|-------|
| 221   | 1     | -0.050 | 1.158 |
| 221   | 2     | -2.778 | 4.551 |

| Point | Image | Vx     | Vy    |
|-------|-------|--------|-------|
| 222   | 1     | -0.032 | 0.819 |
| 222   | 2     | 0.636  | 1.500 |

| Point | Image | Vx     | Vy    |
|-------|-------|--------|-------|
| 223   | 1     | -0.001 | 0.112 |
| 223   | 2     | -0.407 | 1.450 |

| Point | Image | Vx    | Vy     |
|-------|-------|-------|--------|
| 224   | 1     | 0.115 | -3.239 |
| 224   | 2     | 2.074 | 3.128  |

| Point | Image | Vx     | Vy     |
|-------|-------|--------|--------|
| 225   | 1     | -0.001 | 0.019  |
| 225   | 2     | -0.138 | -1.589 |

| Point | Image | Vx     | Vy    |
|-------|-------|--------|-------|
| 226   | 1     | -0.019 | 0.473 |
| 226   | 2     | 1.790  | 0.340 |

| Point | Image | Vx     | Vy     |
|-------|-------|--------|--------|
| 227   | 1     | -0.017 | 0.454  |
| 227   | 2     | 1.913  | -1.881 |

| Point | Image | Vx     | Vy     |
|-------|-------|--------|--------|
| 228   | 1     | -0.056 | 1.829  |
| 228   | 2     | 2.362  | -0.445 |

| Point | Image | Vx    | Vy     |
|-------|-------|-------|--------|
| 229   | 1     | 0.045 | -0.918 |
| 229   | 2     | 2.443 | 2.070  |

| Point | Image | Vx     | Vy    |
|-------|-------|--------|-------|
| 230   | 1     | -0.023 | 0.603 |
| 230   | 2     | -2.640 | 1.457 |

| Point | Image | Vx     | Vy    |
|-------|-------|--------|-------|
| 231   | 1     | -0.030 | 0.752 |
| 231   | 2     | -2.199 | 3.609 |

| Point | Image | Vx     | Vy     |
|-------|-------|--------|--------|
| 232   | 1     | -0.019 | 0.498  |
| 232   | 2     | 0.127  | -2.446 |

| Point | Image | Vx     | Vy     |
|-------|-------|--------|--------|
| 233   | 1     | 0.010  | -0.188 |
| 233   | 2     | -0.001 | 0.718  |

| Point | Image | Vx    | Vy     |
|-------|-------|-------|--------|
| 234   | 1     | 0.007 | -0.227 |
| 234   | 2     | 1.725 | 0.130  |

| Point | Image | Vx     | Vy    |
|-------|-------|--------|-------|
| 235   | 1     | -0.002 | 0.007 |
| 235   | 2     | 1.112  | 0.164 |

| Point | Image | Vx    | Vy     |
|-------|-------|-------|--------|
| 236   | 1     | 0.128 | -3.650 |
| 236   | 2     | 1.861 | 3.727  |

| Point | Image | Vx     | Vy     |
|-------|-------|--------|--------|
| 237   | 1     | -0.002 | 0.053  |
| 237   | 2     | -0.779 | -1.825 |

| Point | Image | Vx     | Vy     |
|-------|-------|--------|--------|
| 238   | 1     | -0.007 | 0.182  |
| 238   | 2     | -0.015 | -1.888 |

| Point | Image | Vx     | Vy     |
|-------|-------|--------|--------|
| 239   | 1     | -0.004 | 0.092  |
| 239   | 2     | -0.782 | -1.921 |

| Point | Image | Vx     | Vy     |
|-------|-------|--------|--------|
| 240   | 1     | -0.054 | 1.836  |
| 240   | 2     | -1.487 | -6.171 |

| Point | Image | Vx    | Vy     |
|-------|-------|-------|--------|
| 241   | 1     | 0.009 | -0.207 |
| 241   | 2     | 1.032 | -0.594 |

| Point | Image | Vx     | Vy     |
|-------|-------|--------|--------|
| 242   | 1     | -0.001 | 0.038  |
| 242   | 2     | -1.457 | -1.090 |

| Point | Image | Vx     | Vy     |
|-------|-------|--------|--------|
| 243   | 1     | -0.037 | 1.009  |
| 243   | 2     | -0.918 | -2.876 |

| Point | Image | Vx     | Vy    |
|-------|-------|--------|-------|
| 244   | 1     | -0.020 | 0.440 |
| 244   | 2     | -4.200 | 4.521 |

| Point | Image | Vx     | Vy    |
|-------|-------|--------|-------|
| 245   | 1     | -0.051 | 1.180 |
| 245   | 2     | 0.812  | 2.334 |

| Point | Image | Vx    | Vy     |
|-------|-------|-------|--------|
| 246   | 1     | 0.021 | -0.400 |
| 246   | 2     | 2.404 | -0.246 |

| Point | Image | Vx     | Vy    |
|-------|-------|--------|-------|
| 247   | 1     | 0.002  | 0.027 |
| 247   | 2     | -0.679 | 1.976 |

| Point | Image | Vx    | Vy     |
|-------|-------|-------|--------|
| 248   | 1     | 0.003 | -0.126 |
| 248   | 2     | 0.387 | 0.655  |

| Point | Image | Vx     | Vy     |
|-------|-------|--------|--------|
| 249   | 1     | -0.069 | 1.867  |
| 249   | 2     | -0.044 | -3.282 |

| Point | Image | Vx    | Vy     |
|-------|-------|-------|--------|
| 250   | 1     | 0.066 | -2.400 |
| 250   | 2     | 0.908 | 4.394  |

| Point | Image | Vx     | Vy    |
|-------|-------|--------|-------|
| 251   | 1     | -0.023 | 0.673 |
| 251   | 2     | 2.131  | 0.187 |

| Point | Image | Vx     | Vy     |
|-------|-------|--------|--------|
| 252   | 1     | -0.023 | 0.681  |
| 252   | 2     | 0.014  | -3.244 |

| Point | Image | Vx     | Vy    |
|-------|-------|--------|-------|
| 253   | 1     | -0.014 | 0.315 |
| 253   | 2     | -5.484 | 5.704 |



| Point | Image | Vx     | Vy     |
|-------|-------|--------|--------|
| 254   | 1     | -0.055 | 1.816  |
| 254   | 2     | -1.166 | -5.786 |

| Point | Image | Vx     | Vy    |
|-------|-------|--------|-------|
| 255   | 1     | -0.015 | 0.416 |
| 255   | 2     | -1.535 | 3.214 |

| Point | Image | Vx    | Vy     |
|-------|-------|-------|--------|
| 256   | 1     | 0.024 | -0.641 |
| 256   | 2     | 2.378 | 0.049  |

| Point | Image | Vx    | Vy     |
|-------|-------|-------|--------|
| 257   | 1     | 0.018 | -0.571 |
| 257   | 2     | 2.004 | 0.986  |

| Point | Image | Vx     | Vy    |
|-------|-------|--------|-------|
| 258   | 1     | -0.038 | 1.205 |
| 258   | 2     | -5.112 | 5.893 |

| Point | Image | Vx     | Vy     |
|-------|-------|--------|--------|
| 259   | 1     | 0.002  | -0.033 |
| 259   | 2     | -0.001 | 0.032  |

| Point | Image | Vx     | Vy     |
|-------|-------|--------|--------|
| 260   | 1     | 0.361  | -8.893 |
| 260   | 2     | -0.338 | 8.894  |

| Point | Image | Vx     | Vy     |
|-------|-------|--------|--------|
| 261   | 1     | 0.128  | -3.521 |
| 261   | 2     | -0.152 | 3.511  |

| Point | Image | Vx     | Vy     |
|-------|-------|--------|--------|
| 262   | 1     | -0.129 | 3.535  |
| 262   | 2     | 0.152  | -3.547 |

| Point | Image | Vx     | Vy     |
|-------|-------|--------|--------|
| 263   | 1     | 0.320  | -8.635 |
| 263   | 2     | -0.368 | 8.703  |

| Point | Image | Vx     | Vy     |
|-------|-------|--------|--------|
| 264   | 1     | -0.011 | 0.319  |
| 264   | 2     | 0.014  | -0.319 |

| Point | Image | Vx     | Vy     |
|-------|-------|--------|--------|
| 265   | 1     | -0.031 | 0.656  |
| 265   | 2     | 0.021  | -0.645 |

| Point | Image | Vx     | Vy     |
|-------|-------|--------|--------|
| 266   | 1     | -0.012 | 0.338  |
| 266   | 2     | 0.015  | -0.337 |

| Point | Image | Vx     | Vy     |
|-------|-------|--------|--------|
| 267   | 1     | 0.026  | -0.653 |
| 267   | 2     | -0.027 | 0.655  |

| Point | Image | Vx     | Vy     |
|-------|-------|--------|--------|
| 268   | 1     | 0.000  | -0.016 |
| 268   | 2     | -0.001 | 0.015  |

| Point | Image | Vx     | Vy     |
|-------|-------|--------|--------|
| 269   | 1     | -0.013 | 0.264  |
| 269   | 2     | 0.009  | -0.262 |

| Point | Image | Vx     | Vy     |
|-------|-------|--------|--------|
| 270   | 1     | -0.275 | 6.729  |
| 270   | 2     | 0.260  | -6.701 |

| Point | Image | Vx     | Vy     |
|-------|-------|--------|--------|
| 271   | 1     | 0.118  | -2.709 |
| 271   | 2     | -0.097 | 2.708  |

Total mean error of 542 image points: ax=-0.000, ay=-0.000

Total RMSE of 542 image points: mx=2.415, my=2.753

The image residuals of the control points

| The image ID = 1 |         |         |  |
|------------------|---------|---------|--|
| Point ID         | Vx      | Vy      |  |
| 1                | -13.964 | -4.934  |  |
| 2                | -15.229 | -5.096  |  |
| 3                | -4.875  | -3.415  |  |
| 4                | 0.943   | -1.997  |  |
| 5                | -0.137  | -1.369  |  |
| 6                | -0.628  | -1.972  |  |
| 7                | 3.784   | -1.173  |  |
| 8                | -1.095  | -2.249  |  |
| 9                | -1.478  | 5.094   |  |
| 10               | -3.934  | -2.465  |  |
| 11               | -1.186  | -4.500  |  |
| 12               | 0.840   | -5.944  |  |
| 13               | 1.606   | -2.922  |  |
| 14               | 1.105   | -3.689  |  |
| 15               | 5.364   | -1.284  |  |
| 16               | 0.704   | -12.773 |  |
| 17               | 0.463   | -0.447  |  |
| 18               | -1.920  | 4.085   |  |
| 19               | 1.276   | 7.694   |  |
| 20               | 3.135   | 7.605   |  |
| 21               | 12.199  | 6.735   |  |
| 22               | -0.096  | 6.241   |  |
| 23               | 9.524   | 4.871   |  |
| 24               | -0.342  | 2.436   |  |
| 25               | -0.801  | 2.537   |  |
| 26               | 2.053   | -0.154  |  |
| 27               | -5.107  | -7.052  |  |
| 28               | 0.042   | -2.125  |  |

|    |         |         |     |        |        |
|----|---------|---------|-----|--------|--------|
| 29 | -2.760  | -0.640  | 89  | -0.000 | 0.067  |
| 30 | -9.642  | -1.047  | 90  | -0.004 | 0.132  |
| 31 | 7.529   | 9.239   | 91  | 0.004  | -0.053 |
| 32 | 3.364   | 2.260   | 92  | -0.011 | 0.329  |
| 33 | -2.149  | 1.778   | 93  | 0.008  | -0.100 |
| 34 | 9.784   | 0.910   | 94  | 0.026  | -0.551 |
| 35 | 10.802  | 0.942   | 95  | 0.035  | -0.770 |
| 36 | 1.099   | 2.648   | 96  | 0.037  | -0.831 |
| 37 | 2.717   | -0.653  | 97  | 0.004  | -0.008 |
| 38 | 10.881  | 7.521   | 98  | 0.005  | -0.031 |
| 39 | -3.206  | -2.252  | 99  | 0.007  | -0.103 |
| 40 | -2.836  | -8.738  | 100 | 0.033  | -0.791 |
| 41 | -3.892  | -0.894  | 101 | -0.000 | 0.039  |
| 42 | 5.338   | -6.726  | 102 | 0.004  | -0.063 |
| 43 | 0.360   | -0.893  | 103 | 0.036  | -0.814 |
| 44 | 2.458   | 2.669   | 104 | 0.018  | -0.426 |
| 45 | 2.218   | 2.868   | 105 | 0.015  | -0.296 |
| 46 | -2.713  | 9.102   | 106 | 0.016  | -0.357 |
| 47 | -0.555  | -1.102  | 107 | 0.008  | -0.124 |
| 48 | 0.940   | -1.866  | 108 | 0.022  | -0.504 |
| 49 | -2.168  | 0.872   | 109 | 0.024  | -0.531 |
| 50 | -0.554  | -1.572  | 110 | 0.013  | -0.426 |
| 51 | 2.320   | -0.878  | 111 | -0.003 | 0.025  |
| 52 | -1.106  | 2.178   | 112 | 0.012  | -0.298 |
| 53 | -14.426 | -2.856  | 113 | 0.011  | -0.266 |
| 54 | 9.007   | -0.472  | 114 | 0.012  | -0.270 |
| 55 | -15.690 | -19.894 | 115 | 0.017  | -0.405 |
| 56 | 1.709   | -5.485  | 116 | 0.013  | -0.292 |
| 57 | -0.033  | 0.838   | 117 | 0.012  | -0.290 |
| 58 | -0.027  | 0.713   | 118 | 0.015  | -0.350 |
| 59 | -0.013  | 0.411   | 119 | 0.009  | -0.221 |
| 60 | -0.062  | 1.453   | 120 | 0.000  | -0.090 |
| 61 | -0.051  | 1.222   | 121 | -0.001 | -0.049 |
| 62 | -0.045  | 1.101   | 122 | 0.002  | -0.089 |
| 63 | -0.049  | 1.184   | 123 | 0.003  | -0.128 |
| 64 | -0.049  | 1.182   | 124 | 0.007  | -0.199 |
| 65 | -0.040  | 0.981   | 125 | 0.023  | -0.631 |
| 66 | -0.034  | 0.868   | 126 | -0.006 | 0.157  |
| 67 | -0.027  | 0.706   | 127 | 0.009  | -0.270 |
| 68 | -0.041  | 1.007   | 128 | 0.006  | -0.181 |
| 69 | -0.010  | 0.327   | 129 | 0.002  | -0.098 |
| 70 | -0.034  | 0.872   | 130 | 0.001  | -0.193 |
| 71 | 0.004   | 0.016   | 131 | -0.018 | 0.406  |
| 72 | -0.026  | 0.700   | 132 | -0.022 | 0.525  |
| 73 | -0.028  | 0.752   | 133 | -0.019 | 0.443  |
| 74 | -0.019  | 0.534   | 134 | -0.031 | 0.780  |
| 75 | -0.021  | 0.565   | 135 | 0.007  | -0.295 |
| 76 | -0.019  | 0.531   | 136 | 0.001  | -0.128 |
| 77 | -0.001  | 0.124   | 137 | 0.002  | -0.154 |
| 78 | 0.024   | -0.415  | 138 | 0.001  | -0.130 |
| 79 | -0.028  | 0.726   | 139 | -0.026 | 0.665  |
| 80 | -0.020  | 0.557   | 140 | -0.004 | 0.083  |
| 81 | -0.028  | 0.743   | 141 | -0.006 | 0.145  |
| 82 | -0.022  | 0.613   | 142 | -0.006 | 0.132  |
| 83 | -0.013  | 0.406   | 143 | -0.012 | 0.304  |
| 84 | -0.021  | 0.570   | 144 | -0.008 | 0.190  |
| 85 | -0.016  | 0.461   | 145 | -0.010 | 0.024  |
| 86 | -0.000  | 0.098   | 146 | -0.035 | 0.867  |
| 87 | -0.004  | 0.145   | 147 | -0.026 | 0.646  |
| 88 | -0.006  | 0.199   | 148 | -0.028 | 0.712  |

|     |        |        |     |        |        |
|-----|--------|--------|-----|--------|--------|
| 149 | -0.033 | 0.867  | 209 | 0.157  | -4.485 |
| 150 | -0.025 | 0.653  | 210 | -0.022 | 0.510  |
| 151 | -0.030 | 0.793  | 211 | -0.027 | 0.690  |
| 152 | -0.028 | 0.724  | 212 | 0.003  | -0.170 |
| 153 | -0.031 | 0.836  | 213 | -0.054 | 1.670  |
| 154 | -0.031 | 0.896  | 214 | -0.033 | 1.013  |
| 155 | -0.034 | 1.008  | 215 | 0.154  | -4.424 |
| 156 | -0.036 | 1.056  | 216 | -0.006 | 0.157  |
| 157 | -0.022 | 0.414  | 217 | 0.001  | -0.033 |
| 158 | -0.043 | 1.165  | 218 | -0.031 | 0.794  |
| 159 | -0.053 | 1.594  | 219 | -0.055 | 1.712  |
| 160 | -0.061 | 1.932  | 220 | -0.036 | 1.081  |
| 161 | -0.045 | 1.387  | 221 | -0.050 | 1.158  |
| 162 | -0.053 | 1.694  | 222 | -0.032 | 0.819  |
| 163 | -0.051 | 1.632  | 223 | -0.001 | 0.112  |
| 164 | -0.054 | 1.777  | 224 | 0.115  | -3.239 |
| 165 | -0.051 | 1.237  | 225 | -0.001 | 0.019  |
| 166 | -0.029 | 0.772  | 226 | -0.019 | 0.473  |
| 167 | 0.002  | -0.051 | 227 | -0.017 | 0.454  |
| 168 | 0.003  | -0.089 | 228 | -0.056 | 1.829  |
| 169 | -0.045 | 1.078  | 229 | 0.045  | -0.918 |
| 170 | -0.037 | 0.922  | 230 | -0.023 | 0.603  |
| 171 | -0.037 | 0.915  | 231 | -0.030 | 0.752  |
| 172 | -0.010 | 0.319  | 232 | -0.019 | 0.498  |
| 173 | 0.002  | 0.007  | 233 | 0.010  | -0.188 |
| 174 | 0.011  | -0.214 | 234 | 0.007  | -0.227 |
| 175 | 0.011  | -0.270 | 235 | -0.002 | 0.007  |
| 176 | 0.033  | -0.825 | 236 | 0.128  | -3.650 |
| 177 | 0.037  | -0.920 | 237 | -0.002 | 0.053  |
| 178 | 0.030  | -0.683 | 238 | -0.007 | 0.182  |
| 179 | 0.017  | -0.355 | 239 | -0.004 | 0.092  |
| 180 | 0.010  | -0.171 | 240 | -0.054 | 1.836  |
| 181 | 0.012  | -0.304 | 241 | 0.009  | -0.207 |
| 182 | 0.019  | -0.454 | 242 | -0.001 | 0.038  |
| 183 | 0.014  | -0.363 | 243 | -0.037 | 1.009  |
| 184 | 0.012  | -0.473 | 244 | -0.020 | 0.440  |
| 185 | -0.026 | 0.670  | 245 | -0.051 | 1.180  |
| 186 | -0.003 | 0.066  | 246 | 0.021  | -0.400 |
| 187 | -0.015 | 0.400  | 247 | 0.002  | 0.027  |
| 188 | -0.019 | 0.526  | 248 | 0.003  | -0.126 |
| 189 | -0.031 | 0.918  | 249 | -0.069 | 1.867  |
| 190 | -0.050 | 1.485  | 250 | 0.066  | -2.400 |
| 191 | -0.055 | 1.653  | 251 | -0.023 | 0.673  |
| 192 | -0.000 | 0.056  | 252 | -0.023 | 0.681  |
| 193 | 0.056  | -1.724 | 253 | -0.014 | 0.315  |
| 194 | -0.014 | 0.306  | 254 | -0.055 | 1.816  |
| 195 | 0.021  | -0.490 | 255 | -0.015 | 0.416  |
| 196 | -0.020 | 0.452  | 256 | 0.024  | -0.641 |
| 197 | -0.018 | 0.475  | 257 | 0.018  | -0.571 |
| 198 | -0.022 | 0.573  | 258 | -0.038 | 1.205  |
| 199 | -0.034 | 0.840  | 259 | 0.002  | -0.033 |
| 200 | -0.041 | 1.003  | 260 | 0.361  | -8.893 |
| 201 | -0.017 | 0.486  | 261 | 0.128  | -3.521 |
| 202 | -0.020 | 0.547  | 262 | -0.129 | 3.535  |
| 203 | 0.010  | -0.218 | 263 | 0.320  | -8.635 |
| 204 | 0.019  | -0.448 | 264 | -0.011 | 0.319  |
| 205 | 0.014  | -0.338 | 265 | -0.031 | 0.656  |
| 206 | -0.005 | 0.038  | 266 | -0.012 | 0.338  |
| 207 | -0.005 | 0.086  | 267 | 0.026  | -0.653 |
| 208 | 0.055  | -1.571 | 268 | 0.000  | -0.016 |

269 -0.013 0.264  
 270 -0.275 6.729  
 RMSE of 271 points: mx=2.683, my=2.653

271 0.118 -2.709

The image ID = 2

| Point ID | Vx     | Vy     |
|----------|--------|--------|
| 1        | -3.959 | 3.272  |
| 2        | -5.701 | 4.128  |
| 3        | -1.972 | -1.154 |
| 4        | -1.520 | -1.897 |
| 5        | -1.643 | 0.298  |
| 6        | -3.489 | -0.121 |
| 7        | -1.248 | 1.543  |
| 8        | -1.971 | 0.172  |
| 9        | -2.737 | 7.546  |
| 10       | -2.791 | -2.088 |
| 11       | -3.069 | 0.619  |
| 12       | -2.224 | -0.420 |
| 13       | -3.964 | 1.788  |
| 14       | -4.412 | 0.500  |
| 15       | -1.667 | 1.752  |
| 16       | 1.538  | 2.999  |
| 17       | -1.303 | -1.091 |
| 18       | -3.502 | 1.629  |
| 19       | -2.169 | -0.165 |
| 20       | -4.013 | 1.861  |
| 21       | 4.129  | 3.561  |
| 22       | -1.439 | 2.777  |
| 23       | 7.022  | 1.018  |
| 24       | -1.221 | -0.949 |
| 25       | -2.462 | 0.532  |
| 26       | -0.734 | -0.369 |
| 27       | -8.341 | -6.686 |
| 28       | -1.436 | -2.461 |
| 29       | -1.930 | -0.294 |
| 30       | -5.958 | -0.084 |
| 31       | 2.519  | 3.749  |
| 32       | 0.524  | 1.253  |
| 33       | -5.600 | -2.830 |
| 34       | 3.022  | 5.165  |
| 35       | 6.782  | 1.027  |
| 36       | -0.462 | 5.194  |
| 37       | 1.427  | 0.547  |
| 38       | 1.556  | 2.323  |
| 39       | -0.036 | -1.470 |
| 40       | -2.938 | -7.685 |
| 41       | -0.941 | -0.097 |
| 42       | 4.536  | -6.677 |
| 43       | 1.065  | -0.063 |
| 44       | 1.685  | -0.443 |
| 45       | 2.975  | -0.667 |
| 46       | -2.574 | 7.485  |
| 47       | -1.747 | -1.590 |
| 48       | -1.762 | -1.356 |
| 49       | -4.127 | 1.337  |
| 50       | -0.831 | -4.530 |
| 51       | -2.356 | 1.491  |
| 52       | -1.894 | 3.201  |
| 53       | -3.989 | -4.542 |
| 54       | 2.590  | -3.106 |

|     |        |        |
|-----|--------|--------|
| 55  | -2.575 | 18.627 |
| 56  | 4.379  | -5.694 |
| 57  | -1.512 | -4.132 |
| 58  | -1.050 | -3.765 |
| 59  | -2.136 | -3.667 |
| 60  | 0.448  | -3.795 |
| 61  | 0.953  | -3.179 |
| 62  | 0.791  | -3.104 |
| 63  | 1.679  | -2.633 |
| 64  | 1.252  | 2.389  |
| 65  | 0.360  | 2.633  |
| 66  | 0.475  | 2.561  |
| 67  | -2.229 | 4.007  |
| 68  | -1.515 | 3.178  |
| 69  | -0.874 | -2.758 |
| 70  | 0.589  | -2.762 |
| 71  | 0.900  | -1.587 |
| 72  | 1.922  | -1.828 |
| 73  | 1.668  | -2.050 |
| 74  | 1.733  | -1.722 |
| 75  | 1.373  | -1.866 |
| 76  | 1.223  | -1.849 |
| 77  | 1.813  | -1.144 |
| 78  | 2.404  | -0.228 |
| 79  | 0.667  | 2.109  |
| 80  | 0.586  | 1.942  |
| 81  | 0.082  | 2.530  |
| 82  | 0.194  | 2.367  |
| 83  | 0.357  | 2.048  |
| 84  | -1.206 | 3.309  |
| 85  | -5.522 | 4.707  |
| 86  | -4.760 | 3.476  |
| 87  | -0.596 | -1.900 |
| 88  | 0.416  | -1.588 |
| 89  | -0.266 | -1.607 |
| 90  | -0.344 | -1.602 |
| 91  | 0.724  | -0.962 |
| 92  | 1.340  | -1.493 |
| 93  | 2.072  | -0.700 |
| 94  | 2.247  | -0.072 |
| 95  | 2.326  | 0.214  |
| 96  | 2.310  | 0.283  |
| 97  | 0.528  | 1.108  |
| 98  | -0.510 | 1.602  |
| 99  | -0.264 | 1.061  |
| 100 | -0.764 | -0.447 |
| 101 | 0.822  | -0.950 |
| 102 | 1.318  | -0.733 |
| 103 | 2.279  | 0.272  |
| 104 | 2.132  | -0.087 |
| 105 | 0.156  | 0.915  |
| 106 | 0.165  | 0.375  |
| 107 | -0.090 | 0.628  |
| 108 | -3.563 | 0.618  |

|     |        |        |     |        |        |
|-----|--------|--------|-----|--------|--------|
| 109 | -4.075 | 1.357  | 169 | -0.270 | -3.686 |
| 110 | -0.190 | 0.625  | 170 | 1.340  | -2.473 |
| 111 | 0.927  | 0.038  | 171 | 0.323  | 2.607  |
| 112 | 2.102  | -0.113 | 172 | 2.343  | -1.051 |
| 113 | 2.279  | -0.128 | 173 | 1.928  | -0.813 |
| 114 | 0.252  | -0.007 | 174 | 1.680  | -0.578 |
| 115 | 0.239  | 0.075  | 175 | 1.502  | -0.238 |
| 116 | 0.095  | -0.073 | 176 | 2.224  | 0.369  |
| 117 | -2.629 | -0.291 | 177 | 2.279  | 0.473  |
| 118 | -2.904 | -0.293 | 178 | 2.450  | 0.600  |
| 119 | -2.610 | -0.676 | 179 | 0.108  | 0.586  |
| 120 | 0.224  | 0.484  | 180 | -0.324 | 0.739  |
| 121 | 0.617  | 0.526  | 181 | 0.054  | -0.510 |
| 122 | 1.393  | 0.086  | 182 | -3.213 | -0.381 |
| 123 | 2.240  | 0.072  | 183 | -1.386 | -0.953 |
| 124 | 0.169  | -1.016 | 184 | 1.298  | 1.224  |
| 125 | -0.116 | -0.669 | 185 | 2.067  | -0.037 |
| 126 | 0.211  | -1.498 | 186 | -0.145 | -1.912 |
| 127 | 0.044  | -1.113 | 187 | -0.138 | -2.704 |
| 128 | -1.327 | -1.693 | 188 | 0.119  | -2.914 |
| 129 | -1.195 | -1.941 | 189 | 0.151  | -3.537 |
| 130 | -1.826 | 1.972  | 190 | 1.677  | 0.511  |
| 131 | 0.805  | 0.405  | 191 | 1.913  | 0.185  |
| 132 | 0.787  | 0.565  | 192 | 1.147  | -1.098 |
| 133 | 0.943  | 0.579  | 193 | 1.496  | 2.285  |
| 134 | 0.606  | 0.895  | 194 | 2.264  | 0.036  |
| 135 | 2.144  | 0.465  | 195 | 0.301  | 0.439  |
| 136 | 2.139  | 0.342  | 196 | 0.971  | 0.679  |
| 137 | 2.079  | 0.508  | 197 | -0.013 | -2.857 |
| 138 | 2.028  | 0.534  | 198 | -2.163 | -3.723 |
| 139 | 2.057  | -0.017 | 199 | 0.822  | -2.602 |
| 140 | -0.138 | -2.000 | 200 | 1.434  | -2.509 |
| 141 | -0.549 | -2.193 | 201 | 0.242  | 2.280  |
| 142 | -0.334 | -2.282 | 202 | 0.425  | 2.071  |
| 143 | 0.047  | -2.369 | 203 | 1.925  | -0.428 |
| 144 | -0.430 | -2.209 | 204 | 2.011  | -0.111 |
| 145 | -5.293 | 4.605  | 205 | 1.957  | -0.216 |
| 146 | -1.473 | 1.831  | 206 | 0.861  | 0.630  |
| 147 | 0.898  | 1.035  | 207 | 1.305  | -0.069 |
| 148 | 1.733  | 0.338  | 208 | 1.948  | 1.589  |
| 149 | 1.690  | 0.400  | 209 | 1.741  | 4.605  |
| 150 | 2.076  | 0.027  | 210 | 0.731  | 0.945  |
| 151 | 2.151  | -0.193 | 211 | 1.728  | 0.246  |
| 152 | 2.061  | 0.085  | 212 | 2.088  | -0.920 |
| 153 | 2.140  | 0.056  | 213 | 1.910  | 0.433  |
| 154 | -0.162 | -3.707 | 214 | 1.994  | -2.345 |
| 155 | 0.061  | -3.754 | 215 | 1.598  | 4.641  |
| 156 | -0.063 | -3.877 | 216 | -0.328 | -2.105 |
| 157 | -4.198 | 4.542  | 217 | -1.073 | -1.909 |
| 158 | -3.779 | 5.214  | 218 | 0.222  | 2.595  |
| 159 | 1.574  | 0.520  | 219 | 1.996  | 0.015  |
| 160 | 2.156  | -0.220 | 220 | -0.246 | -4.044 |
| 161 | 0.043  | -4.354 | 221 | -2.778 | 4.551  |
| 162 | -0.548 | -5.217 | 222 | 0.636  | 1.500  |
| 163 | -0.832 | -5.354 | 223 | -0.407 | 1.450  |
| 164 | -1.299 | -5.895 | 224 | 2.074  | 3.128  |
| 165 | 0.123  | -3.691 | 225 | -0.138 | -1.589 |
| 166 | 1.600  | -2.176 | 226 | 1.790  | 0.340  |
| 167 | 0.276  | -0.857 | 227 | 1.913  | -1.881 |
| 168 | -0.223 | -1.527 | 228 | 2.362  | -0.445 |

|     |        |        |
|-----|--------|--------|
| 229 | 2.443  | 2.070  |
| 230 | -2.640 | 1.457  |
| 231 | -2.199 | 3.609  |
| 232 | 0.127  | -2.446 |
| 233 | -0.001 | 0.718  |
| 234 | 1.725  | 0.130  |
| 235 | 1.112  | 0.164  |
| 236 | 1.861  | 3.727  |
| 237 | -0.779 | -1.825 |
| 238 | -0.015 | -1.888 |
| 239 | -0.782 | -1.921 |
| 240 | -1.487 | -6.171 |
| 241 | 1.032  | -0.594 |
| 242 | -1.457 | -1.090 |
| 243 | -0.918 | -2.876 |
| 244 | -4.200 | 4.521  |
| 245 | 0.812  | 2.334  |
| 246 | 2.404  | -0.246 |
| 247 | -0.679 | 1.976  |
| 248 | 0.387  | 0.655  |
| 249 | -0.044 | -3.282 |
| 250 | 0.908  | 4.394  |

|     |        |        |
|-----|--------|--------|
| 251 | 2.131  | 0.187  |
| 252 | 0.014  | -3.244 |
| 253 | -5.484 | 5.704  |
| 254 | -1.166 | -5.786 |
| 255 | -1.535 | 3.214  |
| 256 | 2.378  | 0.049  |
| 257 | 2.004  | 0.986  |
| 258 | -5.112 | 5.893  |
| 259 | -0.001 | 0.032  |
| 260 | -0.338 | 8.894  |
| 261 | -0.152 | 3.511  |
| 262 | 0.152  | -3.547 |
| 263 | -0.368 | 8.703  |
| 264 | 0.014  | -0.319 |
| 265 | 0.021  | -0.645 |
| 266 | 0.015  | -0.337 |
| 267 | -0.027 | 0.655  |
| 268 | -0.001 | 0.015  |
| 269 | 0.009  | -0.262 |
| 270 | 0.260  | -6.701 |
| 271 | -0.097 | 2.708  |

RMSE of 271 points: mx=2.113, my=2.850

Total number of all control image points = 542

Total rmsex = 2.415, rmsey = 2.753
